# Supplementary material for: Identification of Candidate Therapeutic Target Genes and Profiling of Tumor-Infiltrating Immune Cells in Pancreatic Cancer via Integrated Transcriptomic Analysis
Source: Hindawi journal article supplement (doi:10.1155/2022/3839480), 2022-08-23
Supplement: f1 [file 3839480.f1.docx]

**Supplementary Table S1** The 564 robust DEGs differentially expressed genes.

| Name | pvalue | fdr | logFC |
| --- | --- | --- | --- |
| SERPINI2 | 1.78E-11 | 6.89E-07 | -3.55707 |
| CTRL | 2.55E-10 | 3.49E-06 | -3.34197 |
| ALB | 3.57E-10 | 3.49E-06 | -3.32048 |
| PNLIPRP1 | 4.82E-10 | 3.49E-06 | -3.40983 |
| PNLIPRP2 | 5.54E-10 | 3.49E-06 | -3.45918 |
| GP2 | 6.33E-10 | 3.49E-06 | -3.08747 |
| CELA2B | 6.33E-10 | 3.49E-06 | -2.91024 |
| ERP27 | 1.02E-09 | 4.90E-06 | -2.89664 |
| KLK1 | 1.14E-09 | 4.90E-06 | -2.944 |
| TRHDE | 2.23E-09 | 8.61E-06 | -2.56833 |
| RBPJL | 2.63E-09 | 9.25E-06 | -3.19469 |
| CUZD1 | 3.85E-09 | 1.15E-05 | -3.24753 |
| AQP8 | 3.85E-09 | 1.15E-05 | -3.25848 |
| TMED6 | 5.40E-09 | 1.49E-05 | -2.6583 |
| CPA2 | 6.90E-09 | 1.77E-05 | -2.96244 |
| CLPS | 7.31E-09 | 1.77E-05 | -2.92714 |
| NRG4 | 8.65E-09 | 1.96E-05 | -2.30343 |
| SLC39A5 | 9.13E-09 | 1.96E-05 | -2.23421 |
| GNMT | 9.63E-09 | 1.96E-05 | -2.98112 |
| GABRP | 5.54E-10 | 1.97E-05 | 2.631548 |
| POSTN | 1.02E-09 | 1.97E-05 | 2.851952 |
| CST1 | 1.55E-09 | 1.97E-05 | 2.962468 |
| SULF1 | 2.04E-09 | 1.97E-05 | 2.91143 |
| IAPP | 1.43E-08 | 2.63E-05 | -2.4468 |
| CTRC | 1.49E-08 | 2.63E-05 | -2.4393 |
| NR5A2 | 1.49E-08 | 2.63E-05 | -2.13267 |
| SYCN | 1.63E-08 | 2.63E-05 | -3.13302 |
| EGF | 1.63E-08 | 2.63E-05 | -2.37576 |
| CTSE | 3.58E-09 | 2.77E-05 | 2.621245 |
| PRSS3 | 1.86E-08 | 2.88E-05 | -2.1315 |
| FGL1 | 2.02E-08 | 3.01E-05 | -2.18655 |
| SLC6A14 | 5.40E-09 | 3.48E-05 | 2.684872 |
| COL10A1 | 6.90E-09 | 3.81E-05 | 2.801938 |
| VCAN | 1.01E-08 | 4.82E-05 | 2.650257 |
| FAP | 1.12E-08 | 4.82E-05 | 2.363908 |
| PDIA2 | 3.67E-08 | 5.06E-05 | -2.861 |
| GPHA2 | 3.67E-08 | 5.06E-05 | -2.00725 |
| PLA2G1B | 3.92E-08 | 5.22E-05 | -2.84283 |
| BNIP3 | 4.32E-08 | 5.56E-05 | -1.80519 |
| HOMER2 | 5.36E-08 | 6.66E-05 | -1.74657 |
| MT1G | 5.52E-08 | 6.66E-05 | -1.76354 |
| CDH11 | 1.78E-08 | 6.89E-05 | 2.072456 |
| FNDC1 | 2.02E-08 | 7.11E-05 | 2.076092 |
| SLC4A4 | 6.92E-08 | 8.10E-05 | -1.71353 |
| COL11A1 | 2.66E-08 | 8.57E-05 | 2.422488 |
| TFF1 | 2.97E-08 | 8.84E-05 | 1.98227 |
| ACADL | 8.33E-08 | 9.46E-05 | -1.77968 |
| CEL | 8.76E-08 | 9.64E-05 | -2.34144 |
| CPA1 | 8.99E-08 | 9.64E-05 | -2.63691 |
| COL8A1 | 3.79E-08 | 0.000105 | 1.916298 |
| LAMC2 | 4.18E-08 | 0.000108 | 2.417148 |
| GUCA1C | 1.04E-07 | 0.000109 | -1.67244 |
| COL1A1 | 4.60E-08 | 0.000111 | 2.020712 |
| MT1F | 1.20E-07 | 0.000122 | -1.50477 |
| C5 | 1.31E-07 | 0.000129 | -1.78646 |
| AZGP1 | 1.34E-07 | 0.000129 | -1.70701 |
| IFI27 | 6.55E-08 | 0.000145 | 1.886513 |
| COMP | 6.73E-08 | 0.000145 | 2.390722 |
| SLC30A2 | 1.69E-07 | 0.000159 | -1.93043 |
| CLDN18 | 8.76E-08 | 0.000174 | 1.949376 |
| INHBA | 8.99E-08 | 0.000174 | 2.128487 |
| ITGA2 | 1.02E-07 | 0.000175 | 2.018682 |
| PLAU | 1.02E-07 | 0.000175 | 1.750122 |
| COL3A1 | 1.04E-07 | 0.000175 | 2.141108 |
| CELA3B | 1.94E-07 | 0.000178 | -1.69118 |
| EPHX2 | 2.21E-07 | 0.000193 | -1.58908 |
| P2RX1 | 2.25E-07 | 0.000193 | -1.99421 |
| ANPEP | 2.25E-07 | 0.000193 | -1.74057 |
| GPT2 | 2.34E-07 | 0.000194 | -1.49555 |
| CBS | 2.42E-07 | 0.000194 | -1.61933 |
| PDK4 | 2.42E-07 | 0.000194 | -1.81826 |
| SEL1L | 2.47E-07 | 0.000194 | -1.73398 |
| TMPRSS4 | 1.34E-07 | 0.000215 | 1.934517 |
| GATM | 2.93E-07 | 0.000227 | -1.81745 |
| CEACAM5 | 1.51E-07 | 0.000233 | 2.525208 |
| CHRM3 | 3.19E-07 | 0.000241 | -1.40367 |
| MMP1 | 1.86E-07 | 0.000277 | 2.177832 |
| CP | 1.97E-07 | 0.000283 | 1.80443 |
| LCN2 | 2.13E-07 | 0.000284 | 1.998492 |
| GCNT3 | 2.13E-07 | 0.000284 | 1.752099 |
| AOX1 | 3.86E-07 | 0.000287 | -1.72593 |
| REG1A | 4.10E-07 | 0.000293 | -1.70742 |
| IGFBP2 | 4.10E-07 | 0.000293 | -1.44415 |
| TPST2 | 4.41E-07 | 0.00031 | -1.56682 |
| TDH | 4.61E-07 | 0.000318 | -1.56149 |
| BRSK2 | 4.88E-07 | 0.000331 | -1.68293 |
| LGALS2 | 5.02E-07 | 0.000335 | -1.654 |
| COL5A2 | 2.74E-07 | 0.000348 | 2.203342 |
| S100P | 2.95E-07 | 0.000348 | 2.704483 |
| SULF2 | 2.98E-07 | 0.000348 | 1.677969 |
| CST2 | 3.08E-07 | 0.000348 | 1.538811 |
| KRT19 | 3.13E-07 | 0.000348 | 1.900987 |
| GPRC5A | 3.24E-07 | 0.000348 | 1.825923 |
| ANXA10 | 3.24E-07 | 0.000348 | 1.832094 |
| NQO1 | 3.46E-07 | 0.000361 | 1.560804 |
| KLB | 5.54E-07 | 0.000363 | -1.49654 |
| PLAC8 | 3.57E-07 | 0.000363 | 2.038724 |
| RAB26 | 5.69E-07 | 0.000366 | -1.63826 |
| GRPR | 6.33E-07 | 0.000391 | -1.7717 |
| FAM3B | 6.33E-07 | 0.000391 | -1.57025 |
| IMPA2 | 6.41E-07 | 0.000391 | -1.40965 |
| ABAT | 6.49E-07 | 0.000391 | -1.45004 |
| MKNK1 | 6.58E-07 | 0.000391 | -1.21365 |
| MT1H | 7.28E-07 | 0.000426 | -1.74296 |
| ARHGDIG | 7.74E-07 | 0.000446 | -1.24444 |
| AKAP7 | 8.22E-07 | 0.000467 | -1.18634 |
| SLC41A1 | 8.72E-07 | 0.000482 | -1.35969 |
| SCGN | 8.72E-07 | 0.000482 | -1.36856 |
| GREM1 | 4.95E-07 | 0.000491 | 1.987931 |
| NRCAM | 9.57E-07 | 0.000521 | -1.38031 |
| LAMB3 | 6.00E-07 | 0.00058 | 2.088398 |
| MT1M | 1.08E-06 | 0.00058 | -1.4378 |
| CCL20 | 6.24E-07 | 0.000589 | 1.716718 |
| PNLIP | 1.12E-06 | 0.000591 | -1.68642 |
| EFNB2 | 6.58E-07 | 0.000605 | 1.426958 |
| GATA4 | 1.17E-06 | 0.000609 | -1.14274 |
| OLFML2B | 6.83E-07 | 0.000614 | 1.830583 |
| SLPI | 7.10E-07 | 0.000623 | 1.922622 |
| GMNN | 1.24E-06 | 0.00064 | -1.4196 |
| TCEA3 | 1.31E-06 | 0.00066 | -1.23277 |
| TC2N | 1.35E-06 | 0.00066 | -1.31166 |
| CHAC1 | 1.35E-06 | 0.00066 | -1.25297 |
| CTH | 1.35E-06 | 0.00066 | -1.228 |
| CHGA | 1.40E-06 | 0.000678 | -1.09697 |
| CEACAM6 | 8.32E-07 | 0.000707 | 2.441545 |
| COL1A2 | 8.42E-07 | 0.000707 | 2.208595 |
| LYZ | 8.62E-07 | 0.000709 | 1.390775 |
| TMC5 | 9.03E-07 | 0.000727 | 1.736995 |
| CTNND2 | 1.55E-06 | 0.000739 | -1.32608 |
| IGFBP3 | 9.57E-07 | 0.000754 | 2.014133 |
| ECHDC3 | 1.61E-06 | 0.000757 | -1.18625 |
| CCDC110 | 1.63E-06 | 0.000757 | -1.47642 |
| MFAP5 | 9.90E-07 | 0.000765 | 1.64794 |
| SLC3A1 | 1.67E-06 | 0.000769 | -1.4932 |
| ABCA5 | 1.75E-06 | 0.000793 | -1.07847 |
| PBLD | 1.77E-06 | 0.000793 | -1.30994 |
| SFRP5 | 1.78E-06 | 0.000793 | -1.72736 |
| AEBP1 | 1.05E-06 | 0.000793 | 1.690231 |
| GSTA1 | 1.85E-06 | 0.000811 | -1.21945 |
| MCOLN3 | 1.87E-06 | 0.000811 | -1.20377 |
| DDC | 1.92E-06 | 0.000815 | -1.34957 |
| HPN | 1.92E-06 | 0.000815 | -1.16683 |
| CTHRC1 | 1.12E-06 | 0.00083 | 2.484278 |
| GJB2 | 1.18E-06 | 0.000845 | 2.476367 |
| SERPINB5 | 1.18E-06 | 0.000845 | 2.146572 |
| BCAT1 | 2.03E-06 | 0.000851 | -1.09988 |
| SLC16A10 | 2.08E-06 | 0.000864 | -1.61048 |
| SFN | 1.24E-06 | 0.000866 | 2.288076 |
| THBS2 | 1.26E-06 | 0.000866 | 2.30783 |
| SLC38A5 | 2.15E-06 | 0.000885 | -1.47085 |
| CHAD | 2.27E-06 | 0.000922 | -1.42655 |
| ENTPD1 | 1.40E-06 | 0.000952 | 1.406557 |
| PTGER4 | 2.39E-06 | 0.00096 | -1.20798 |
| BTG2 | 2.59E-06 | 0.001022 | -1.29862 |
| KLF15 | 2.70E-06 | 0.001053 | -1.33285 |
| TGFBI | 1.61E-06 | 0.001072 | 1.366503 |
| RAB31 | 1.66E-06 | 0.001085 | 1.821551 |
| FN1 | 1.70E-06 | 0.001089 | 2.192193 |
| DKK1 | 1.72E-06 | 0.001089 | 1.592593 |
| MSLN | 1.78E-06 | 0.001112 | 1.749029 |
| KIRREL2 | 3.01E-06 | 0.001153 | -1.68879 |
| CDH3 | 2.03E-06 | 0.001242 | 1.610082 |
| STXBP6 | 3.43E-06 | 0.001286 | -1.01839 |
| ZBTB16 | 3.43E-06 | 0.001286 | -1.00067 |
| NPY1R | 3.56E-06 | 0.001322 | -1.03058 |
| MALL | 2.27E-06 | 0.001348 | 1.329379 |
| DPYSL3 | 2.27E-06 | 0.001348 | 1.380744 |
| MAL2 | 2.31E-06 | 0.00135 | 1.291613 |
| SEMA3C | 2.35E-06 | 0.001353 | 1.588665 |
| SFRP2 | 2.41E-06 | 0.001367 | 1.820807 |
| CTRB2 | 3.77E-06 | 0.001386 | -2.18695 |
| LEMD1 | 2.63E-06 | 0.001475 | 1.495428 |
| GCAT | 4.19E-06 | 0.001528 | -1.51806 |
| PLA2G7 | 2.81E-06 | 0.001541 | 1.27951 |
| PI3 | 2.83E-06 | 0.001541 | 1.432086 |
| SGIP1 | 2.88E-06 | 0.001543 | 1.238716 |
| GAMT | 4.37E-06 | 0.001578 | -1.15914 |
| FAM83D | 3.23E-06 | 0.001699 | 1.348968 |
| CXCL10 | 3.25E-06 | 0.001699 | 1.186894 |
| EPSTI1 | 3.40E-06 | 0.001753 | 1.224858 |
| FAM107A | 4.96E-06 | 0.001776 | -1.00148 |
| ANO1 | 3.61E-06 | 0.001835 | 1.470304 |
| NUCB2 | 5.19E-06 | 0.001836 | -1.3149 |
| BACE1 | 5.23E-06 | 0.001836 | -1.43496 |
| LUM | 3.69E-06 | 0.001852 | 1.403391 |
| TMEM52 | 5.42E-06 | 0.001888 | -2.15727 |
| KCNJ16 | 5.54E-06 | 0.00191 | -1.19091 |
| FRMD6 | 3.88E-06 | 0.001911 | 1.315799 |
| SPARC | 3.91E-06 | 0.001911 | 1.606844 |
| KCNJ5 | 5.64E-06 | 0.00193 | -1.25962 |
| OLR1 | 4.13E-06 | 0.001997 | 1.845112 |
| NPR3 | 4.22E-06 | 0.002014 | 1.418681 |
| SPOCK1 | 4.31E-06 | 0.002031 | 1.437177 |
| GPX2 | 4.43E-06 | 0.002062 | 1.440856 |
| TRIM59 | 4.52E-06 | 0.002079 | 1.218186 |
| CCKBR | 6.31E-06 | 0.002119 | -1.92251 |
| C2CD4B | 6.42E-06 | 0.002139 | -1.64255 |
| OAS1 | 4.74E-06 | 0.002154 | 1.297645 |
| F11 | 6.56E-06 | 0.002167 | -2.1286 |
| SLC38A3 | 6.62E-06 | 0.002167 | -1.1488 |
| CAPG | 4.83E-06 | 0.002172 | 1.514315 |
| CCL18 | 5.06E-06 | 0.002248 | 1.294472 |
| ADAM9 | 5.16E-06 | 0.002266 | 1.230765 |
| TSPAN8 | 5.23E-06 | 0.00227 | 1.3481 |
| VEPH1 | 7.10E-06 | 0.002306 | -1.39854 |
| CA4 | 7.27E-06 | 0.002321 | -1.71038 |
| BEX1 | 7.27E-06 | 0.002321 | -1.07897 |
| RBP1 | 7.61E-06 | 0.002374 | -1.00521 |
| ADHFE1 | 7.70E-06 | 0.002374 | -1.25334 |
| PEBP4 | 7.70E-06 | 0.002374 | -1.24224 |
| RNF186 | 7.74E-06 | 0.002374 | -1.60428 |
| PAIP2B | 7.81E-06 | 0.002375 | -1.27302 |
| MYOF | 5.54E-06 | 0.002377 | 1.454887 |
| MMP9 | 5.68E-06 | 0.002411 | 1.558679 |
| LMF2 | 8.05E-06 | 0.002431 | -1.02421 |
| AHNAK2 | 5.93E-06 | 0.002492 | 1.74837 |
| MGLL | 6.08E-06 | 0.002526 | 1.279113 |
| MAT1A | 8.65E-06 | 0.002546 | -1.1434 |
| REG1B | 8.70E-06 | 0.002546 | -1.96211 |
| ALOX5AP | 6.27E-06 | 0.002577 | 1.548309 |
| ATP4A | 8.94E-06 | 0.002597 | -1.94807 |
| SLC16A4 | 6.50E-06 | 0.002641 | 1.365425 |
| COL17A1 | 6.56E-06 | 0.002641 | 1.553322 |
| RPL3L | 9.23E-06 | 0.002642 | -1.26046 |
| KYNU | 6.66E-06 | 0.002652 | 1.411311 |
| CEP55 | 6.78E-06 | 0.002672 | 1.389134 |
| ENO2 | 6.90E-06 | 0.002692 | 1.281218 |
| KRT6A | 6.98E-06 | 0.002697 | 1.566982 |
| LTBP1 | 7.06E-06 | 0.002701 | 1.229304 |
| COL5A1 | 7.23E-06 | 0.002738 | 1.959054 |
| FBXO32 | 7.31E-06 | 0.002742 | 1.280357 |
| TCN1 | 7.38E-06 | 0.002742 | 1.685493 |
| THY1 | 7.57E-06 | 0.002759 | 1.398979 |
| CTSK | 7.57E-06 | 0.002759 | 1.613832 |
| CLDN3 | 9.78E-06 | 0.002779 | -1.02229 |
| COL6A3 | 7.74E-06 | 0.002796 | 1.718536 |
| HSD17B6 | 7.83E-06 | 0.002801 | 1.201787 |
| PALLD | 7.92E-06 | 0.002807 | 1.223023 |
| AGR2 | 8.14E-06 | 0.00286 | 1.434905 |
| PHGDH | 1.03E-05 | 0.002879 | -1.0433 |
| DPEP1 | 1.03E-05 | 0.002879 | -1.24156 |
| KCNK3 | 1.04E-05 | 0.002879 | -1.2642 |
| VIPR2 | 1.06E-05 | 0.002933 | -1.25354 |
| A1CF | 1.08E-05 | 0.002945 | -1.04488 |
| PHYHIPL | 1.09E-05 | 0.002945 | -1.53461 |
| CELP | 1.11E-05 | 0.002968 | -1.36922 |
| DLGAP5 | 8.75E-06 | 0.00304 | 1.169308 |
| PLAUR | 8.89E-06 | 0.00304 | 1.30409 |
| ID1 | 8.89E-06 | 0.00304 | 1.022958 |
| TOP2A | 9.13E-06 | 0.003095 | 1.712176 |
| GRB14 | 1.19E-05 | 0.003106 | -1.03151 |
| SLC17A4 | 1.19E-05 | 0.003106 | -1.75259 |
| TMEM125 | 1.20E-05 | 0.003106 | -1.03353 |
| INPP4B | 9.68E-06 | 0.003203 | 1.350438 |
| IFI44L | 9.73E-06 | 0.003203 | 1.509587 |
| CAP1 | 9.78E-06 | 0.003203 | 1.030743 |
| FXYD5 | 9.78E-06 | 0.003203 | 1.134504 |
| PLXDC2 | 9.89E-06 | 0.00321 | 1.39359 |
| SEC11C | 1.26E-05 | 0.003217 | -1.00963 |
| MXRA5 | 1.01E-05 | 0.00325 | 1.420822 |
| MX2 | 1.04E-05 | 0.003324 | 1.074598 |
| CPB1 | 1.33E-05 | 0.00336 | -1.91308 |
| CRIP1 | 1.07E-05 | 0.003382 | 1.239615 |
| NPHS1 | 1.36E-05 | 0.003404 | -1.72048 |
| RORC | 1.38E-05 | 0.00343 | -1.00961 |
| PM20D1 | 1.39E-05 | 0.003437 | -1.53236 |
| S100A2 | 1.10E-05 | 0.003458 | 1.215684 |
| GBP2 | 1.12E-05 | 0.0035 | 1.106087 |
| DNASE1 | 1.43E-05 | 0.003519 | -1.38268 |
| SPACA3 | 1.45E-05 | 0.003519 | -2.02109 |
| SLC25A15 | 1.50E-05 | 0.003604 | -1.02224 |
| CAMK2N2 | 1.54E-05 | 0.003658 | -1.51419 |
| ACSM3 | 1.58E-05 | 0.003718 | -1.00882 |
| ANTXR2 | 1.22E-05 | 0.003734 | 1.19879 |
| HEPH | 1.23E-05 | 0.003734 | 1.195059 |
| MFAP2 | 1.23E-05 | 0.003734 | 1.188653 |
| RARRES1 | 1.24E-05 | 0.003741 | 1.675097 |
| GGT6 | 1.66E-05 | 0.003856 | -1.11798 |
| SFTA2 | 1.29E-05 | 0.003876 | 1.451692 |
| CTSS | 1.31E-05 | 0.003883 | 1.104257 |
| SRPX2 | 1.34E-05 | 0.003946 | 1.179667 |
| NT5E | 1.35E-05 | 0.003953 | 1.263547 |
| IL22RA1 | 1.74E-05 | 0.004021 | -1.26181 |
| PRSS1 | 1.76E-05 | 0.004039 | -1.56861 |
| PSAT1 | 1.80E-05 | 0.004113 | -1.44761 |
| OSMR | 1.42E-05 | 0.004118 | 1.090941 |
| GLT8D2 | 1.43E-05 | 0.004118 | 1.228145 |
| SLC43A1 | 1.82E-05 | 0.004141 | -1.37593 |
| CCNB1 | 1.47E-05 | 0.004213 | 1.084072 |
| ECT2 | 1.50E-05 | 0.004213 | 1.251289 |
| MMP12 | 1.51E-05 | 0.004213 | 1.619296 |
| LIF | 1.51E-05 | 0.004213 | 1.08203 |
| NMU | 1.52E-05 | 0.004213 | 1.271649 |
| ADAMTS12 | 1.54E-05 | 0.00424 | 1.137277 |
| MMP7 | 1.56E-05 | 0.004267 | 1.815822 |
| ST6GALNAC1 | 1.58E-05 | 0.004283 | 1.104372 |
| RSAD2 | 1.58E-05 | 0.004283 | 1.20004 |
| ANLN | 1.62E-05 | 0.004308 | 1.393377 |
| IGFBP5 | 1.64E-05 | 0.004317 | 1.351868 |
| SPON1 | 1.66E-05 | 0.004325 | 1.10991 |
| RASL10B | 1.96E-05 | 0.004346 | -1.04045 |
| CENPK | 1.69E-05 | 0.004391 | 1.098485 |
| PROX1 | 2.01E-05 | 0.004398 | -1.26219 |
| SERPINI1 | 2.16E-05 | 0.004558 | -1.03467 |
| TMEM45B | 1.78E-05 | 0.004575 | 1.223478 |
| SLC8A2 | 2.18E-05 | 0.004588 | -1.39346 |
| PCDH7 | 1.82E-05 | 0.004629 | 1.056713 |
| SERPINB3 | 1.83E-05 | 0.004629 | 1.335813 |
| TMEM154 | 1.85E-05 | 0.004629 | 1.010731 |
| ACSL5 | 1.85E-05 | 0.004629 | 1.187653 |
| KCNK1 | 1.86E-05 | 0.004629 | 1.045037 |
| GPC6 | 1.87E-05 | 0.004629 | 1.036721 |
| REG3G | 2.24E-05 | 0.004667 | -1.754 |
| SAMD9 | 1.90E-05 | 0.004678 | 1.192273 |
| HLA-DQA1 | 1.93E-05 | 0.004707 | 1.001939 |
| HK2 | 1.94E-05 | 0.004707 | 1.242535 |
| LGALS4 | 1.97E-05 | 0.004707 | 1.050943 |
| FSTL1 | 1.97E-05 | 0.004707 | 1.049964 |
| TMSB10 | 1.97E-05 | 0.004707 | 1.195406 |
| GPR87 | 1.99E-05 | 0.004717 | 1.038041 |
| COL12A1 | 2.11E-05 | 0.004965 | 1.553095 |
| LAPTM5 | 2.15E-05 | 0.005035 | 1.083615 |
| TMEM97 | 2.52E-05 | 0.005108 | -1.2012 |
| EPB41L4B | 2.57E-05 | 0.005119 | -1.07638 |
| WNK2 | 2.58E-05 | 0.005119 | -1.50654 |
| LGALS3BP | 2.27E-05 | 0.005291 | 1.236421 |
| FXYD3 | 2.30E-05 | 0.005291 | 1.36959 |
| LEF1 | 2.33E-05 | 0.005291 | 1.310015 |
| PRRX1 | 2.33E-05 | 0.005291 | 1.356985 |
| MTMR11 | 2.33E-05 | 0.005291 | 1.033672 |
| PTGS2 | 2.38E-05 | 0.005313 | 1.015571 |
| PLAT | 2.39E-05 | 0.005313 | 1.592036 |
| IGF2BP3 | 2.39E-05 | 0.005313 | 1.217984 |
| COCH | 2.79E-05 | 0.005372 | -1.05822 |
| PAK3 | 2.86E-05 | 0.005464 | -1.046 |
| EGLN3 | 2.52E-05 | 0.005554 | 1.176901 |
| FGD6 | 2.55E-05 | 0.005607 | 1.090437 |
| CORO2A | 2.61E-05 | 0.005693 | 1.189455 |
| MATN3 | 2.62E-05 | 0.005693 | 1.500801 |
| ZNF521 | 2.70E-05 | 0.005729 | 1.315218 |
| S100A16 | 2.71E-05 | 0.005729 | 1.307077 |
| ADAM28 | 2.71E-05 | 0.005729 | 1.100839 |
| LOX | 2.72E-05 | 0.005729 | 1.297339 |
| STYK1 | 2.73E-05 | 0.005729 | 1.133637 |
| FBN1 | 2.73E-05 | 0.005729 | 1.518882 |
| SLC44A4 | 2.74E-05 | 0.005729 | 1.195506 |
| MMP11 | 2.80E-05 | 0.005795 | 2.032704 |
| LY6E | 2.85E-05 | 0.0058 | 1.085895 |
| MUC17 | 2.87E-05 | 0.0058 | 1.156631 |
| TTYH1 | 3.09E-05 | 0.005822 | -1.29906 |
| KIAA1324 | 3.12E-05 | 0.005826 | -1.61482 |
| C19orf33 | 2.95E-05 | 0.005937 | 1.572473 |
| OSBPL3 | 2.98E-05 | 0.005974 | 1.243404 |
| BEX5 | 3.38E-05 | 0.006155 | -1.21479 |
| GPNMB | 3.25E-05 | 0.006279 | 1.400869 |
| LGALS1 | 3.30E-05 | 0.006305 | 1.257665 |
| AQP12B | 3.57E-05 | 0.006434 | -1.56158 |
| EPHX1 | 3.58E-05 | 0.006434 | -1.11432 |
| C5orf46 | 3.48E-05 | 0.006566 | 1.022485 |
| SGPP2 | 3.57E-05 | 0.006662 | 1.095807 |
| EDNRA | 3.57E-05 | 0.006662 | 1.632603 |
| AQP12A | 3.85E-05 | 0.006766 | -2.26291 |
| ERO1LB | 3.85E-05 | 0.006766 | -1.55626 |
| MIA | 3.75E-05 | 0.006905 | 1.158035 |
| C1S | 3.82E-05 | 0.006988 | 1.168829 |
| IFITM1 | 3.85E-05 | 0.006992 | 1.062446 |
| VNN1 | 3.85E-05 | 0.006992 | 1.001903 |
| IFI16 | 3.88E-05 | 0.007005 | 1.160194 |
| DMBT1 | 3.93E-05 | 0.007033 | 1.136773 |
| IL1RAP | 4.00E-05 | 0.007116 | 1.016329 |
| NOX4 | 4.10E-05 | 0.007238 | 1.446385 |
| PLS1 | 4.16E-05 | 0.007299 | 1.007242 |
| TGM2 | 4.24E-05 | 0.007408 | 1.256147 |
| ZNF532 | 4.28E-05 | 0.007437 | 1.059325 |
| MUC16 | 4.32E-05 | 0.007437 | 1.460621 |
| S100A4 | 4.35E-05 | 0.007437 | 1.388784 |
| BIRC3 | 4.35E-05 | 0.007437 | 1.041273 |
| TAP1 | 4.39E-05 | 0.007437 | 1.021275 |
| AMHR2 | 4.42E-05 | 0.007584 | -1.6284 |
| KLF5 | 4.50E-05 | 0.007585 | 1.090011 |
| HOXB2 | 4.51E-05 | 0.007585 | 1.099892 |
| SLC24A3 | 4.57E-05 | 0.007647 | 1.094142 |
| CTSB | 4.61E-05 | 0.007677 | 1.063678 |
| ONECUT1 | 4.53E-05 | 0.007709 | -1.51288 |
| C6 | 4.77E-05 | 0.007974 | -1.45984 |
| DPP10 | 4.87E-05 | 0.008016 | -1.34154 |
| GIPC2 | 4.92E-05 | 0.008062 | -1.07129 |
| SDR16C5 | 4.98E-05 | 0.008091 | 1.365852 |
| TNFRSF21 | 5.03E-05 | 0.008098 | 1.15921 |
| COL4A1 | 5.09E-05 | 0.008163 | 1.218563 |
| IL2RG | 5.17E-05 | 0.008234 | 1.023369 |
| SFRP4 | 5.18E-05 | 0.008234 | 1.701064 |
| MAP4K4 | 5.20E-05 | 0.008234 | 1.041299 |
| MST1R | 5.25E-05 | 0.008275 | 1.214799 |
| TRIM31 | 5.65E-05 | 0.008682 | 1.266098 |
| BCAS1 | 5.66E-05 | 0.008682 | 1.276837 |
| ITGB6 | 5.66E-05 | 0.008682 | 1.34538 |
| FAM150B | 5.43E-05 | 0.008708 | -1.40139 |
| EFNA5 | 5.73E-05 | 0.008754 | 1.328846 |
| SST | 5.66E-05 | 0.008925 | -1.25013 |
| UMOD | 5.75E-05 | 0.008993 | -1.10263 |
| TNFRSF11B | 5.93E-05 | 0.009027 | 1.086997 |
| SHISA2 | 6.02E-05 | 0.009121 | 1.395672 |
| CD109 | 6.07E-05 | 0.009164 | 1.056034 |
| CXCL5 | 6.26E-05 | 0.009376 | 1.407011 |
| TPX2 | 6.39E-05 | 0.009457 | 1.254065 |
| PLEK2 | 6.44E-05 | 0.0095 | 1.162583 |
| VTCN1 | 6.11E-05 | 0.009513 | -1.13116 |
| TIMP1 | 6.64E-05 | 0.009612 | 1.543277 |
| RGN | 6.35E-05 | 0.009857 | -1.05319 |
| HOXB3 | 7.09E-05 | 0.010112 | 1.101551 |
| GPX8 | 7.25E-05 | 0.010257 | 1.267904 |
| RAB23 | 7.36E-05 | 0.01031 | 1.03758 |
| PDZK1 | 6.76E-05 | 0.010325 | -1.04452 |
| EDIL3 | 7.46E-05 | 0.010363 | 1.23237 |
| RAI14 | 7.52E-05 | 0.010377 | 1.020465 |
| TNFAIP6 | 7.55E-05 | 0.010377 | 1.5021 |
| MLPH | 7.68E-05 | 0.010491 | 1.120581 |
| GSTA2 | 7.02E-05 | 0.010592 | -1.2867 |
| JUP | 7.93E-05 | 0.010712 | 1.010703 |
| ELK3 | 7.97E-05 | 0.010731 | 1.014362 |
| PRSS2 | 7.29E-05 | 0.010815 | -1.60075 |
| F5 | 8.14E-05 | 0.01087 | 1.083377 |
| S100A6 | 8.29E-05 | 0.01091 | 1.165466 |
| UBE2T | 8.35E-05 | 0.01091 | 1.089938 |
| LXN | 8.35E-05 | 0.01091 | 1.267917 |
| HTR2B | 8.37E-05 | 0.01091 | 1.105538 |
| LAMP5 | 8.38E-05 | 0.01091 | 1.099364 |
| DACT1 | 8.39E-05 | 0.01091 | 1.381458 |
| DUOX2 | 8.41E-05 | 0.01091 | 1.470645 |
| SLC6A6 | 8.54E-05 | 0.011004 | 1.272408 |
| SNAI2 | 8.63E-05 | 0.011079 | 1.001687 |
| GNA15 | 8.74E-05 | 0.011146 | 1.210473 |
| GPR137B | 8.87E-05 | 0.011279 | 1.139826 |
| TMEM200A | 8.99E-05 | 0.011346 | 1.367066 |
| NDC80 | 8.99E-05 | 0.011346 | 1.040668 |
| PLEKHG1 | 9.10E-05 | 0.011442 | 1.054494 |
| C15orf48 | 9.91E-05 | 0.012191 | 1.249922 |
| ANTXR1 | 9.94E-05 | 0.012191 | 1.312196 |
| ANXA1 | 9.99E-05 | 0.012211 | 1.089392 |
| TEX11 | 8.66E-05 | 0.01226 | -1.70848 |
| PSCA | 0.000101 | 0.012261 | 1.42771 |
| SLC2A1 | 0.000102 | 0.012429 | 1.312313 |
| NRTN | 8.85E-05 | 0.012482 | -1.07851 |
| IGFL2 | 0.000104 | 0.01259 | 1.155352 |
| ADAMTS2 | 0.000106 | 0.012661 | 1.119771 |
| SERPINA5 | 9.12E-05 | 0.012709 | -1.03347 |
| KRT17 | 0.000106 | 0.012726 | 1.444978 |
| STC2 | 9.28E-05 | 0.012853 | -1.04366 |
| SARDH | 9.51E-05 | 0.013033 | -1.05558 |
| ASPN | 0.000111 | 0.013184 | 1.333899 |
| BGN | 0.000116 | 0.013522 | 1.284253 |
| GBP3 | 0.000119 | 0.01366 | 1.085162 |
| FCER1G | 0.000122 | 0.013871 | 1.102493 |
| MMP2 | 0.000128 | 0.014297 | 1.063954 |
| SCEL | 0.000131 | 0.014491 | 1.224931 |
| SERPINH1 | 0.000131 | 0.014491 | 1.075544 |
| NCF2 | 0.000137 | 0.014805 | 1.168857 |
| TNFSF4 | 0.000138 | 0.014805 | 1.036911 |
| EPS8L3 | 0.000141 | 0.014976 | 1.375846 |
| SLC30A8 | 0.000116 | 0.015014 | -1.01171 |
| ARSE | 0.000121 | 0.015211 | -1.18103 |
| KIF1A | 0.000123 | 0.015322 | -1.36167 |
| GRB10 | 0.000124 | 0.015322 | -1.12182 |
| DCDC2 | 0.000126 | 0.015606 | -1.20792 |
| KRT7 | 0.000151 | 0.015704 | 1.144594 |
| AMY2B | 0.000128 | 0.015772 | -1.13176 |
| ITGA11 | 0.000156 | 0.016012 | 1.058395 |
| IFI44 | 0.000157 | 0.01608 | 1.168906 |
| LMO3 | 0.000132 | 0.016103 | -1.26931 |
| TRIM29 | 0.000158 | 0.016138 | 1.084549 |
| TRPV6 | 0.000133 | 0.016211 | -1.21794 |
| CLEC5A | 0.000167 | 0.016781 | 1.083026 |
| GLS2 | 0.000141 | 0.016784 | -1.29693 |
| GJA1 | 0.000169 | 0.016821 | 1.008448 |
| KLK7 | 0.000172 | 0.016937 | 1.383084 |
| MKI67 | 0.00018 | 0.017419 | 1.199357 |
| LRRN1 | 0.000182 | 0.017532 | 1.167056 |
| SPX | 0.000152 | 0.017794 | -1.07461 |
| PTGIS | 0.000185 | 0.017796 | 1.046972 |
| MMP10 | 0.000189 | 0.01796 | 1.025095 |
| TWIST1 | 0.000193 | 0.018064 | 1.32431 |
| CKS2 | 0.000194 | 0.018064 | 1.004795 |
| MUC13 | 0.000197 | 0.018126 | 1.278954 |
| CRABP2 | 0.000198 | 0.018145 | 1.147952 |
| RNASE6 | 0.000198 | 0.018145 | 1.037901 |
| SLC7A2 | 0.000166 | 0.018878 | -1.30802 |
| TFF2 | 0.00021 | 0.018889 | 1.045307 |
| PDGFRB | 0.000212 | 0.018935 | 1.043668 |
| SYT6 | 0.000168 | 0.019041 | -1.24826 |
| ISG15 | 0.000221 | 0.019538 | 1.228091 |
| PNMA1 | 0.000226 | 0.019618 | 1.265827 |
| CPA4 | 0.000176 | 0.019695 | -1.05516 |
| SORBS2 | 0.000181 | 0.019944 | -1.02583 |
| PITX1 | 0.000233 | 0.019955 | 1.459859 |
| HLA-DRA | 0.000234 | 0.01996 | 1.026019 |
| PKHD1 | 0.000186 | 0.020434 | -1.11568 |
| CXCR4 | 0.000245 | 0.020519 | 1.156073 |
| LOXL1 | 0.000256 | 0.02104 | 1.17918 |
| EPO | 0.000195 | 0.02124 | -1.2668 |
| PMEPA1 | 0.00026 | 0.02124 | 1.010214 |
| FOXQ1 | 0.000267 | 0.021516 | 1.057973 |
| HS3ST1 | 0.000268 | 0.021516 | 1.013889 |
| TSPAN1 | 0.000275 | 0.021866 | 1.506522 |
| SLC25A34 | 0.000206 | 0.022017 | -1.08118 |
| ISLR | 0.000279 | 0.022021 | 1.439549 |
| SYTL2 | 0.000293 | 0.02258 | 1.048918 |
| FLRT2 | 0.000219 | 0.022889 | -1.0135 |
| SLC6A16 | 0.000224 | 0.023246 | -1.13665 |
| MOXD1 | 0.000307 | 0.023333 | 1.033787 |
| OAS2 | 0.00031 | 0.023333 | 1.038422 |
| EPYC | 0.000315 | 0.02359 | 1.099142 |
| CSTA | 0.000318 | 0.023641 | 1.05015 |
| SCTR | 0.000233 | 0.023689 | -1.17252 |
| PLA2R1 | 0.000334 | 0.024239 | 1.076107 |
| BHLHA15 | 0.00025 | 0.02483 | -1.80516 |
| BEGAIN | 0.000255 | 0.025253 | -1.06198 |
| FHL2 | 0.000382 | 0.026548 | 1.015003 |
| HMCN1 | 0.000396 | 0.0273 | 1.126815 |
| CEACAM1 | 0.000409 | 0.02771 | 1.051655 |
| CELA3A | 0.000301 | 0.028052 | -1.01664 |
| FAM19A5 | 0.000437 | 0.028803 | 1.155534 |
| BIK | 0.000441 | 0.028955 | 1.201534 |
| REG3A | 0.000319 | 0.029296 | -1.26348 |
| NTRK2 | 0.00032 | 0.029301 | -1.00923 |
| NCAPG | 0.000451 | 0.029361 | 1.001582 |
| PLEKHH1 | 0.000326 | 0.029595 | -1.01291 |
| FXYD2 | 0.000329 | 0.029817 | -1.20051 |
| CCDC64B | 0.000343 | 0.030599 | -1.14093 |
| RADIL | 0.000357 | 0.031671 | -1.06736 |
| KSR1 | 0.000366 | 0.032192 | -1.10577 |
| RARRES3 | 0.000525 | 0.032432 | 1.134479 |
| DHRS9 | 0.000533 | 0.032662 | 1.077918 |
| NBL1 | 0.00055 | 0.033403 | 1.111711 |
| LRIG1 | 0.000399 | 0.034216 | -1.01991 |
| DPCR1 | 0.000584 | 0.034268 | 1.30101 |
| HOXB7 | 0.000588 | 0.034335 | 1.265611 |
| SPP1 | 0.000599 | 0.034575 | 1.059134 |
| C1QC | 0.000633 | 0.035506 | 1.083904 |
| TTN | 0.000431 | 0.036278 | -1.08854 |
| VSIG1 | 0.000679 | 0.03678 | 1.180031 |
| KRT16 | 0.000681 | 0.03678 | 1.04824 |
| TMEM119 | 0.000695 | 0.036977 | 1.162718 |
| SERPINB2 | 0.000707 | 0.037327 | 1.049522 |
| CDA | 0.00072 | 0.037785 | 1.163013 |
| ITGBL1 | 0.00073 | 0.038045 | 1.314671 |
| MICB | 0.00074 | 0.038196 | 1.127244 |
| LY75 | 0.000751 | 0.038474 | 1.091829 |
| PTF1A | 0.000467 | 0.038634 | -1.77318 |
| MAP6D1 | 0.000486 | 0.039348 | -1.00462 |
| MBOAT2 | 0.000804 | 0.039867 | 1.116991 |
| CYP2S1 | 0.000808 | 0.040008 | 1.284535 |
| MNDA | 0.000813 | 0.040188 | 1.010462 |
| KRT23 | 0.000824 | 0.040577 | 1.162792 |
| COL4A2 | 0.00085 | 0.04111 | 1.00123 |
| EMILIN1 | 0.000886 | 0.041687 | 1.228042 |
| GLI2 | 0.000894 | 0.041924 | 1.061973 |
| PPAPDC1A | 0.000897 | 0.041949 | 1.195995 |
| CFTR | 0.000576 | 0.043568 | -1.09543 |
| PRRG1 | 0.000955 | 0.043754 | 1.071729 |
| IGFN1 | 0.000582 | 0.043929 | -1.27192 |
| CDC20 | 0.000979 | 0.044432 | 1.075124 |
| CYP1B1 | 0.000994 | 0.044878 | 1.034201 |
| CLIC3 | 0.001025 | 0.045665 | 1.287186 |
| ABCC8 | 0.000677 | 0.048145 | -1.08414 |
| ITGA3 | 0.001153 | 0.049278 | 1.026169 |
