# Supplementary material for: Identification of Candidate Therapeutic Target Genes and Profiling of Tumor-Infiltrating Immune Cells in Pancreatic Cancer via Integrated Transcriptomic Analysis
Source: Hindawi journal article supplement (doi:10.1155/2022/3839480), 2022-08-23
Supplement: f2 [file 3839480.f2.docx]

**Supplementary Table S2** GO enrichment analysis of the 564 robust DEGs.

ONTOLOGY ID Description GeneRatio BgRatio pvalue p.adjust qvalue geneID Count

BP GO:0030198 extracellular matrix organization 64/532 368/18670 4.82561613809812e-32 2.1001081433003e-28 1.75855611264165e-28 POSTN/SULF1/COL10A1/VCAN/FAP/COL11A1/COL8A1/LAMC2/COL1A1/COMP/ITGA2/COL3A1/MMP1/COL5A2/SULF2/GREM1/LAMB3/COL1A2/MFAP5/AEBP1/HPN/SERPINB5/TGFBI/FN1/SFRP2/CTRB2/LUM/SPARC/MMP9/COL17A1/COL5A1/CTSK/COL6A3/NPHS1/MFAP2/CTSS/PRSS1/MMP12/MMP7/COL12A1/MATN3/LOX/FBN1/MMP11/COL4A1/ITGB6/TNFRSF11B/TIMP1/PRSS2/ANTXR1/ADAMTS2/BGN/MMP2/SERPINH1/ITGA11/KLK7/MMP10/LOXL1/FLRT2/SPP1/COL4A2/EMILIN1/CYP1B1/ITGA3 64

BP GO:0043062 extracellular structure organization 67/532 422/18670 4.86432370150309e-31 1.05847683744707e-27 8.86330981821247e-28 ALB/POSTN/SULF1/COL10A1/VCAN/FAP/COL11A1/COL8A1/LAMC2/COL1A1/COMP/ITGA2/COL3A1/MMP1/COL5A2/SULF2/GREM1/LAMB3/COL1A2/MFAP5/ABCA5/AEBP1/HPN/SERPINB5/TGFBI/FN1/SFRP2/CTRB2/PLA2G7/LUM/SPARC/MMP9/COL17A1/COL5A1/CTSK/COL6A3/NPHS1/MFAP2/CTSS/PRSS1/MMP12/MMP7/COL12A1/MATN3/LOX/FBN1/MMP11/COL4A1/ITGB6/TNFRSF11B/TIMP1/PRSS2/ANTXR1/ADAMTS2/BGN/MMP2/SERPINH1/ITGA11/KLK7/MMP10/LOXL1/FLRT2/SPP1/COL4A2/EMILIN1/CYP1B1/ITGA3 67

BP GO:0030199 collagen fibril organization 18/532 54/18670 4.32629095995798e-15 6.27600608591238e-12 5.25530501872791e-12 COL11A1/COL1A1/COMP/COL3A1/COL5A2/GREM1/COL1A2/AEBP1/SFRP2/LUM/COL5A1/COL12A1/LOX/MMP11/ADAMTS2/SERPINH1/EMILIN1/CYP1B1 18

BP GO:0032963 collagen metabolic process 21/532 115/18670 1.05005368002013e-11 1.1424584038619e-08 9.566541684815e-09 FAP/COL1A1/ITGA2/MMP1/COL1A2/MMP9/COL5A1/CTSK/ID1/CTSS/MMP12/MMP7/MMP11/CTSB/PRSS2/ADAMTS2/MMP2/SERPINH1/MMP10/PDGFRB/EMILIN1 21

BP GO:0031589 cell-substrate adhesion 35/532 354/18670 1.67543564639308e-10 1.45829918662053e-07 1.22112804375007e-07 CUZD1/POSTN/COL8A1/LAMC2/COL1A1/ITGA2/PLAU/COL3A1/LAMB3/CEACAM6/FN1/MSLN/FAM107A/SPOCK1/ADAM9/COL17A1/THY1/AGR2/ID1/MMP12/ADAMTS12/TTYH1/LGALS1/ONECUT1/MAP4K4/ITGB6/EFNA5/EDIL3/JUP/ANTXR1/ITGA11/RADIL/ITGBL1/EMILIN1/ITGA3 35

BP GO:0030574 collagen catabolic process 13/532 47/18670 4.09249065648748e-10 2.96841988950559e-07 2.48564958820345e-07 FAP/MMP1/MMP9/CTSK/CTSS/MMP12/MMP7/MMP11/CTSB/PRSS2/ADAMTS2/MMP2/MMP10 13

BP GO:0010951 negative regulation of endopeptidase activity 28/532 250/18670 7.07708048913513e-10 4.39992204124516e-07 3.68433874487005e-07 SERPINI2/CST1/C5/CST2/SLPI/SERPINB5/SFN/SFRP2/PI3/SPOCK1/MMP9/COL6A3/DPEP1/PLAUR/RARRES1/SERPINI1/SERPINB3/LEF1/PTGS2/IFI16/BIRC3/CD109/TIMP1/LXN/SERPINA5/SERPINH1/CSTA/SERPINB2 28

BP GO:0010466 negative regulation of peptidase activity 28/532 262/18670 2.06144101041302e-09 1.12142390966469e-06 9.39040628690775e-07 SERPINI2/CST1/C5/CST2/SLPI/SERPINB5/SFN/SFRP2/PI3/SPOCK1/MMP9/COL6A3/DPEP1/PLAUR/RARRES1/SERPINI1/SERPINB3/LEF1/PTGS2/IFI16/BIRC3/CD109/TIMP1/LXN/SERPINA5/SERPINH1/CSTA/SERPINB2 28

BP GO:0007586 digestion 20/532 139/18670 2.66372071036591e-09 1.28805694794583e-06 1.07857322798676e-06 PNLIPRP2/CLPS/PRSS3/TFF1/CEL/CHRM3/GCNT3/PNLIP/PBLD/CTRB2/NPR3/CCKBR/PRSS1/NMU/PLS1/SST/PRSS2/MUC13/TFF2/VSIG1 20

BP GO:0035987 endodermal cell differentiation 12/532 45/18670 3.0932927850858e-09 1.34620102006934e-06 1.12726101283864e-06 COL11A1/COL8A1/INHBA/COL5A2/LAMB3/FN1/DKK1/MMP9/COL5A1/COL12A1/MMP2/COL4A2 12

BP GO:0061448 connective tissue development 28/532 273/18670 5.18452496510336e-09 2.05118660437544e-06 1.71759095016151e-06 SULF1/COL11A1/COL1A1/COMP/SULF2/GREM1/TGFBI/ZBTB16/SFRP2/LUM/COL5A1/CTSK/COL6A3/CRIP1/RORC/ADAMTS12/COL12A1/PRRX1/COCH/MATN3/LOX/TIMP1/HOXB3/SNAI2/SERPINH1/PDGFRB/PITX1/GLI2 28

BP GO:0022617 extracellular matrix disassembly 15/532 80/18670 6.57181483486048e-09 2.3833781801094e-06 1.99575639984974e-06 FAP/MMP1/CTRB2/MMP9/CTSK/CTSS/PRSS1/MMP12/MMP7/MMP11/TIMP1/PRSS2/MMP2/KLK7/MMP10 15

BP GO:0019730 antimicrobial humoral response 18/532 122/18670 1.11065374564823e-08 3.56492554546662e-06 2.98514227902608e-06 PRSS3/PLA2G1B/LCN2/REG1A/SLPI/CHGA/LYZ/PI3/CXCL10/REG1B/KRT6A/REG3G/DMBT1/CXCL5/PRSS2/KLK7/RNASE6/REG3A 18

BP GO:0001706 endoderm formation 12/532 50/18670 1.14680509275121e-08 3.56492554546662e-06 2.98514227902608e-06 COL11A1/COL8A1/INHBA/COL5A2/LAMB3/FN1/DKK1/MMP9/COL5A1/COL12A1/MMP2/COL4A2 12

BP GO:0001503 ossification 34/532 398/18670 1.33557846483168e-08 3.87495831929832e-06 3.24475273350686e-06 VCAN/CDH11/COL11A1/COL1A1/COMP/COL5A2/GREM1/COL1A2/IGFBP3/CTHRC1/PTGER4/DKK1/ZBTB16/SFRP2/SPARC/CTSK/ID1/IGFBP5/LEF1/PTGS2/LOX/GPNMB/IFITM1/SNAI2/ASPN/MMP2/ITGA11/CLEC5A/GJA1/TWIST1/ISG15/SPP1/TMEM119/GLI2 34

BP GO:0007492 endoderm development 14/532 76/18670 2.66525823264619e-08 7.24950239279763e-06 6.07047631672441e-06 COL11A1/COL8A1/INHBA/COL5A2/LAMB3/GATA4/FN1/DKK1/MMP9/COL5A1/COL12A1/ONECUT1/MMP2/COL4A2 14

BP GO:0051216 cartilage development 23/532 209/18670 3.31492148027056e-08 8.48619898949263e-06 7.10604220724252e-06 SULF1/COL11A1/COL1A1/COMP/SULF2/GREM1/TGFBI/ZBTB16/SFRP2/LUM/CTSK/COL6A3/ADAMTS12/COL12A1/PRRX1/COCH/MATN3/TIMP1/HOXB3/SNAI2/SERPINH1/PITX1/GLI2 23

BP GO:0048771 tissue remodeling 21/532 179/18670 4.32363033183336e-08 1.04535773356327e-05 8.75345509286964e-06 IAPP/CLDN18/PDK4/GREM1/CTHRC1/SEMA3C/CTSK/LIF/IGFBP5/GPNMB/NOX4/TGM2/TNFRSF11B/TIMP1/ANXA1/BGN/MMP2/GJA1/CEACAM1/SPP1/TMEM119 21

BP GO:0060348 bone development 23/532 217/18670 6.6768926392382e-08 1.52935982978761e-05 1.28063170731538e-05 SULF1/COL1A1/COMP/CLDN18/SULF2/GREM1/CHAD/PTGER4/SFRP2/SPARC/COL6A3/COL12A1/COCH/MATN3/LOX/FBN1/SFRP4/RGN/RAB23/SERPINH1/GJA1/TWIST1/TMEM119 23

BP GO:0031667 response to nutrient levels 37/532 499/18670 1.2254661175494e-07 2.6666142717875e-05 2.23292826260843e-05 ALB/CLPS/SLC39A5/POSTN/COL1A1/ITGA2/P2RX1/PDK4/LCN2/REG1A/IGFBP2/NQO1/GATA4/SFRP2/SGIP1/CXCL10/FAM107A/NUCB2/SPARC/SLC38A3/KYNU/MMP7/PROX1/FSTL1/PTGS2/KIAA1324/IFI16/SST/TNFRSF11B/SNAI2/SLC2A1/STC2/SPX/EPO/SCTR/BHLHA15/SPP1 37

BP GO:0009612 response to mechanical stimulus 22/532 210/18670 1.58316234662512e-07 3.28091549167264e-05 2.74732232782766e-05 POSTN/BNIP3/COL11A1/COL1A1/ITGA2/COL3A1/IGFBP2/GATA4/HPN/PTGER4/BTG2/CXCL10/BACE1/CCNB1/MMP7/PTGS2/JUP/SLC2A1/SCEL/GJA1/CXCR4/TTN 22

BP GO:0048871 multicellular organismal homeostasis 36/532 485/18670 1.77531591990522e-07 3.51189767428523e-05 2.94073861947936e-05 ALB/IAPP/HOMER2/TFF1/ACADL/AZGP1/CLDN18/PDK4/GATM/LCN2/PLAC8/ABAT/LYZ/PBLD/SFN/CDH3/SGIP1/NPR3/CTSK/ID1/PM20D1/MFAP2/NMU/PTGS2/NOX4/TNFRSF11B/GRB10/GJA1/MUC13/TFF2/CXCR4/SPP1/VSIG1/KRT16/TMEM119/CFTR 36

BP GO:0045861 negative regulation of proteolysis 30/532 363/18670 1.99199848634867e-07 3.67796433177722e-05 3.07979695158009e-05 SERPINI2/CST1/C5/CST2/SLPI/CHAC1/SERPINB5/SFN/SFRP2/PI3/SPOCK1/MMP9/COL6A3/DPEP1/PLAUR/RARRES1/SERPINI1/SERPINB3/LEF1/PTGS2/PLAT/IFI16/BIRC3/CD109/TIMP1/LXN/SERPINA5/SERPINH1/CSTA/SERPINB2 30

BP GO:0046697 decidualization 8/532 24/18670 2.02828915355361e-07 3.67796433177722e-05 3.07979695158009e-05 GJB2/LIF/PTGS2/CTSB/STC2/GJA1/PTGIS/SPP1 8

BP GO:0007178 transmembrane receptor protein serine/threonine kinase signaling pathway 29/532 349/18670 2.84377426001771e-07 4.95044223183883e-05 4.14532483712898e-05 SLC39A5/SULF1/COMP/INHBA/COL3A1/GREM1/GATA4/COL1A2/PBLD/SFRP5/DKK1/SFRP2/ADAM9/VEPH1/LTBP1/ID1/FSTL1/LEF1/LOX/FBN1/AMHR2/ONECUT1/SFRP4/CD109/ASPN/PMEPA1/NBL1/EMILIN1/ITGA3 29

BP GO:0001704 formation of primary germ layer 16/532 121/18670 3.42067676582664e-07 5.72568664802982e-05 4.7944870296728e-05 COL11A1/COL8A1/INHBA/ITGA2/COL5A2/LAMB3/FN1/DKK1/SFRP2/MMP9/COL5A1/COL12A1/LEF1/MMP2/COL4A2/ITGA3 16

BP GO:0002062 chondrocyte differentiation 16/532 123/18670 4.2945434065335e-07 6.92216774267918e-05 5.79637788437386e-05 SULF1/COL11A1/COMP/SULF2/GREM1/TGFBI/ZBTB16/SFRP2/COL6A3/ADAMTS12/COL12A1/COCH/MATN3/SNAI2/SERPINH1/GLI2 16

BP GO:0043588 skin development 32/532 419/18670 4.63275783776774e-07 7.17763628159334e-05 6.0102981827777e-05 COL1A1/COMP/INHBA/ITGA2/COL3A1/COL5A2/KRT19/COL1A2/SFN/DKK1/CDH3/PI3/ADAM9/KRT6A/COL5A1/CTSK/PALLD/IGFBP5/REG3G/CD109/JUP/ANXA1/ADAMTS2/KRT17/SCEL/KRT7/FOXQ1/CSTA/REG3A/KRT16/KRT23/ITGA3 32

BP GO:0046394 carboxylic acid biosynthetic process 34/532 462/18670 4.78289182367203e-07 7.17763628159334e-05 6.0102981827777e-05 EGF/VCAN/PLA2G1B/ACADL/EPHX2/GPT2/CBS/PDK4/GATM/ABAT/CTH/BCAT1/GAMT/RBP1/MGLL/ALOX5AP/KYNU/ENO2/PHGDH/ACSM3/GGT6/PSAT1/PROX1/HK2/PTGS2/OSBPL3/RGN/ANXA1/BGN/GLS2/PTGIS/CRABP2/CEACAM1/DHRS9 34

BP GO:0016053 organic acid biosynthetic process 34/532 463/18670 5.02679638722213e-07 7.29220595906356e-05 6.10623476932035e-05 EGF/VCAN/PLA2G1B/ACADL/EPHX2/GPT2/CBS/PDK4/GATM/ABAT/CTH/BCAT1/GAMT/RBP1/MGLL/ALOX5AP/KYNU/ENO2/PHGDH/ACSM3/GGT6/PSAT1/PROX1/HK2/PTGS2/OSBPL3/RGN/ANXA1/BGN/GLS2/PTGIS/CRABP2/CEACAM1/DHRS9 34

BP GO:0007160 cell-matrix adhesion 22/532 225/18670 5.2553969795722e-07 7.37789924358007e-05 6.1779912880404e-05 POSTN/ITGA2/PLAU/COL3A1/CEACAM6/FN1/MSLN/FAM107A/ADAM9/COL17A1/THY1/MMP12/ADAMTS12/ONECUT1/MAP4K4/ITGB6/EFNA5/JUP/ITGA11/ITGBL1/EMILIN1/ITGA3 22

BP GO:0007565 female pregnancy 20/532 192/18670 6.33648941900148e-07 8.61762560984201e-05 7.21609420019181e-05 ITGA2/IGFBP2/GJB2/SLC38A3/MMP9/LIF/MMP7/IGFBP5/PTGS2/CTSB/TIMP1/SLC2A1/STC2/MMP2/GJA1/PTGIS/EPO/EPYC/SPP1/ITGA3 20

BP GO:0002063 chondrocyte development 10/532 48/18670 8.01107085897063e-07 0.000105649031449213 8.84667537918862e-05 SULF1/COL11A1/COMP/SULF2/SFRP2/COL6A3/COL12A1/COCH/MATN3/SERPINH1 10

BP GO:0090287 regulation of cellular response to growth factor stimulus 25/532 292/18670 1.09302031044816e-06 0.000139906599737364 0.00011715282708271 SULF1/SULF2/GREM1/GATA4/PBLD/SFRP5/DKK1/SFRP2/VEPH1/MYOF/LTBP1/ADAMTS12/FSTL1/LOX/FBN1/ONECUT1/SFRP4/SHISA2/CD109/ASPN/GRB10/PMEPA1/NBL1/EMILIN1/ITGA3 25

BP GO:0061041 regulation of wound healing 17/532 148/18670 1.12638755533616e-06 0.000140058246880656 0.000117279811024775 FAP/PLAU/ABAT/F11/TSPAN8/PLAUR/REG3G/PLAT/CD109/DUOX2/ANXA1/FCER1G/GJA1/CXCR4/CEACAM1/REG3A/SERPINB2 17

BP GO:0044706 multi-multicellular organism process 21/532 222/18670 1.629839595985e-06 0.000197029497825743 0.000164985516997078 ITGA2/P2RX1/IGFBP2/GJB2/SLC38A3/MMP9/LIF/MMP7/IGFBP5/PTGS2/CTSB/TIMP1/SLC2A1/STC2/MMP2/GJA1/PTGIS/EPO/EPYC/SPP1/ITGA3 21

BP GO:0072503 cellular divalent inorganic cation homeostasis 34/532 493/18670 2.07120340041176e-06 0.000241941616692387 0.000202593333250059 SLC39A5/IAPP/PLA2G1B/BNIP3/MT1G/MT1F/SLC30A2/EPHX2/P2RX1/MT1H/SLC41A1/SCGN/MT1M/MCOLN3/PTGER4/CXCL10/CCKBR/THY1/KCNK3/NMU/SLC8A2/EDNRA/TGM2/SLC24A3/RGN/HTR2B/GNA15/STC2/SLC30A8/TRPV6/GJA1/PKHD1/CXCR4/EPO 34

BP GO:0010038 response to metal ion 28/532 364/18670 2.11254168986918e-06 0.000241941616692387 0.000202593333250059 BNIP3/MT1G/TFF1/MT1F/SLC30A2/IGFBP2/NQO1/ABAT/MT1H/SLC41A1/MT1M/BACE1/SPARC/ADAM9/MMP9/ALOX5AP/DPEP1/KCNK3/CRIP1/CCNB1/ECT2/PTGS2/S100A16/TNFRSF11B/SLC30A8/TRPV6/SYT6/TTN 28

BP GO:0052547 regulation of peptidase activity 32/532 452/18670 2.3912735061119e-06 0.000266841597399974 0.000223443694417258 SERPINI2/CST1/C5/P2RX1/CST2/SLPI/SERPINB5/SFN/FN1/SFRP2/PI3/SPOCK1/MMP9/COL6A3/DPEP1/PLAUR/RARRES1/SERPINI1/SERPINB3/LEF1/PTGS2/EGLN3/IFI16/BIRC3/CD109/TIMP1/LXN/ANTXR1/SERPINA5/SERPINH1/CSTA/SERPINB2 32

BP GO:1900047 negative regulation of hemostasis 10/532 54/18670 2.51424957288548e-06 0.000273550353529941 0.000229061368982357 FAP/COMP/PLAU/ABAT/F11/TSPAN8/PLAUR/PLAT/CEACAM1/SERPINB2 10

BP GO:0001667 ameboidal-type cell migration 32/532 461/18670 3.61980141164572e-06 0.000384228676670297 0.000321739473353465 PRSS3/FAP/ITGA2/S100P/GREM1/EFNB2/PBLD/FN1/SEMA3C/SPARC/ADAM9/MMP9/ID1/CAP1/S100A2/SRPX2/ANLN/PROX1/EPB41L4B/PTGS2/PAK3/MAP4K4/TIMP1/JUP/HTR2B/ANXA1/NRTN/TWIST1/CEACAM1/KRT16/CYP1B1/ITGA3 32

BP GO:1903034 regulation of response to wounding 18/532 179/18670 3.80021683073505e-06 0.000393774848746641 0.00032973309944874 FAP/PLAU/ABAT/F11/TSPAN8/PLAUR/REG3G/PLAT/CD109/DUOX2/ANXA1/FCER1G/GJA1/CXCR4/CEACAM1/REG3A/SPP1/SERPINB2 18

BP GO:0051346 negative regulation of hydrolase activity 32/532 466/18670 4.53156098661131e-06 0.000458636125900754 0.000384045633675602 SERPINI2/CST1/C5/CST2/SLPI/SERPINB5/SFN/SFRP2/PI3/SPOCK1/MMP9/COL6A3/DPEP1/PLAUR/RARRES1/SERPINI1/SERPINB3/LEF1/PTGS2/IFI16/BIRC3/CD109/TIMP1/RGN/LXN/ANXA1/SERPINA5/SERPINH1/SYTL2/CSTA/PLA2R1/SERPINB2 32

BP GO:0001893 maternal placenta development 8/532 35/18670 4.92359972443693e-06 0.000486988772744307 0.000407787135071786 GJB2/LIF/PTGS2/CTSB/STC2/GJA1/PTGIS/SPP1 8

BP GO:0022600 digestive system process 13/532 100/18670 5.21199918762516e-06 0.000495990504906655 0.000415324866482885 TFF1/CEL/CHRM3/GCNT3/PNLIP/PBLD/NPR3/CCKBR/NMU/PLS1/MUC13/TFF2/VSIG1 13

BP GO:0052548 regulation of endopeptidase activity 30/532 425/18670 5.24254669708321e-06 0.000495990504906655 0.000415324866482885 SERPINI2/CST1/C5/P2RX1/CST2/SLPI/SERPINB5/SFN/SFRP2/PI3/SPOCK1/MMP9/COL6A3/DPEP1/PLAUR/RARRES1/SERPINI1/SERPINB3/LEF1/PTGS2/EGLN3/IFI16/BIRC3/CD109/TIMP1/LXN/SERPINA5/SERPINH1/CSTA/SERPINB2 30

BP GO:0090288 negative regulation of cellular response to growth factor stimulus 17/532 166/18670 5.50297616353459e-06 0.000509552175823459 0.000426680928962078 SULF1/SULF2/GREM1/PBLD/DKK1/SFRP2/VEPH1/LTBP1/ADAMTS12/FBN1/ONECUT1/SHISA2/CD109/ASPN/PMEPA1/NBL1/EMILIN1 17

BP GO:0090092 regulation of transmembrane receptor protein serine/threonine kinase signaling pathway 21/532 241/18670 5.99572249698097e-06 0.000543612173059608 0.000455201563257634 SULF1/INHBA/GREM1/GATA4/PBLD/SFRP5/DKK1/SFRP2/VEPH1/LTBP1/FSTL1/LOX/FBN1/ONECUT1/SFRP4/CD109/ASPN/PMEPA1/NBL1/EMILIN1/ITGA3 21

BP GO:0006520 cellular amino acid metabolic process 27/532 366/18670 6.97218617512603e-06 0.000619243963962214 0.000518532943894443 GNMT/SLC6A14/GPT2/CBS/GATM/TDH/NQO1/ABAT/CTH/SLC3A1/DDC/BCAT1/GCAT/GAMT/ADHFE1/MAT1A/KYNU/PHGDH/DPEP1/PM20D1/PSAT1/EGLN3/NOX4/SLC6A6/SARDH/GLS2/SLC7A2 27

BP GO:0001649 osteoblast differentiation 20/532 225/18670 7.39662416982544e-06 0.000634616615078972 0.000531405456995792 VCAN/COL1A1/GREM1/IGFBP3/CTHRC1/SFRP2/ID1/IGFBP5/LEF1/LOX/GPNMB/IFITM1/SNAI2/ITGA11/CLEC5A/GJA1/TWIST1/SPP1/TMEM119/GLI2 20

BP GO:0071772 response to BMP 17/532 170/18670 7.58273529046566e-06 0.000634616615078972 0.000531405456995792 SLC39A5/SULF1/COMP/GREM1/GATA4/SFRP5/DKK1/SFRP2/ID1/ADAMTS12/FSTL1/LEF1/FBN1/AMHR2/SFRP4/NBL1/ITGA3 17

BP GO:0071773 cellular response to BMP stimulus 17/532 170/18670 7.58273529046566e-06 0.000634616615078972 0.000531405456995792 SLC39A5/SULF1/COMP/GREM1/GATA4/SFRP5/DKK1/SFRP2/ID1/ADAMTS12/FSTL1/LEF1/FBN1/AMHR2/SFRP4/NBL1/ITGA3 17

BP GO:0050673 epithelial cell proliferation 30/532 434/18670 7.91742299169902e-06 0.000650124997356115 0.000544391626559325 SULF1/FGL1/FAP/COL8A1/REG1A/SULF2/EFNB2/IGFBP3/PBLD/HPN/SERPINB5/SFN/CDH3/SFRP2/SPARC/ID1/MMP12/IGFBP5/PROX1/REG3G/SGPP2/SDR16C5/CD109/RGN/HTR2B/SNAI2/GJA1/TWIST1/CEACAM1/REG3A 30

BP GO:1903035 negative regulation of response to wounding 12/532 90/18670 9.1917433922167e-06 0.000740786430424576 0.000620308296761291 FAP/PLAU/ABAT/F11/TSPAN8/PLAUR/PLAT/CD109/GJA1/CEACAM1/SPP1/SERPINB2 12

BP GO:0061045 negative regulation of wound healing 11/532 76/18670 9.72895453529143e-06 0.000769825638865242 0.000644624700501032 FAP/PLAU/ABAT/F11/TSPAN8/PLAUR/PLAT/CD109/GJA1/CEACAM1/SERPINB2 11

BP GO:0030509 BMP signaling pathway 16/532 157/18670 1.10047953344891e-05 0.000842861402263634 0.000705782259732174 SLC39A5/SULF1/COMP/GREM1/GATA4/SFRP5/DKK1/SFRP2/ID1/FSTL1/LEF1/FBN1/AMHR2/SFRP4/NBL1/ITGA3 16

BP GO:0008544 epidermis development 31/532 464/18670 1.10393152410448e-05 0.000842861402263634 0.000705782259732174 LAMC2/INHBA/KRT19/LAMB3/MCOLN3/SFN/DKK1/CDH3/PI3/ADAM9/COL17A1/KRT6A/CTSK/PALLD/IGFBP5/REG3G/SLC44A4/SFRP4/CD109/JUP/ANXA1/KRT17/SCEL/KRT7/KLK7/CRABP2/FOXQ1/CSTA/REG3A/KRT16/KRT23 31

BP GO:0007566 embryo implantation 9/532 51/18670 1.21230405519763e-05 0.000882521337990523 0.000738992084008124 MMP9/LIF/PTGS2/TIMP1/STC2/MMP2/PTGIS/EPO/SPP1 9

BP GO:0060135 maternal process involved in female pregnancy 10/532 64/18670 1.23298447198926e-05 0.000882521337990523 0.000738992084008124 GJB2/LIF/MMP7/PTGS2/CTSB/STC2/GJA1/PTGIS/SPP1/ITGA3 10

BP GO:0014831 gastro-intestinal system smooth muscle contraction 5/532 12/18670 1.23698992687091e-05 0.000882521337990523 0.000738992084008124 SULF1/SULF2/NMU/HTR2B/SPX 5

BP GO:0060394 negative regulation of pathway-restricted SMAD protein phosphorylation 5/532 12/18670 1.23698992687091e-05 0.000882521337990523 0.000738992084008124 GREM1/PBLD/DKK1/PMEPA1/EMILIN1 5

BP GO:0033273 response to vitamin 12/532 93/18670 1.29392127685063e-05 0.000908249257557084 0.000760535731826293 POSTN/COL1A1/ITGA2/GATA4/CXCL10/SPARC/KYNU/PTGS2/SNAI2/STC2/EPO/SPP1 12

BP GO:0010810 regulation of cell-substrate adhesion 19/532 215/18670 1.35366112477253e-05 0.000935100510319058 0.000783020019041355 POSTN/COL8A1/COL1A1/PLAU/CEACAM6/FN1/FAM107A/SPOCK1/THY1/AGR2/MMP12/LGALS1/ONECUT1/MAP4K4/EFNA5/EDIL3/JUP/EMILIN1/ITGA3 19

BP GO:0071559 response to transforming growth factor beta 21/532 255/18670 1.42740116421231e-05 0.000970632791664371 0.000812773491859049 POSTN/COL1A1/COL3A1/COL1A2/PBLD/ADAM9/VEPH1/LTBP1/ID1/MXRA5/LOX/FBN1/NOX4/AMHR2/ONECUT1/CD109/ASPN/PMEPA1/COL4A2/EMILIN1/ITGA3 21

BP GO:1900046 regulation of hemostasis 11/532 80/18670 1.60631362605823e-05 0.0010754887539393 0.00090057615763783 FAP/COMP/PLAU/ABAT/F11/TSPAN8/PLAUR/PLAT/FCER1G/CEACAM1/SERPINB2 11

BP GO:0030195 negative regulation of blood coagulation 9/532 53/18670 1.67882439223169e-05 0.00110700662954429 0.000926968109394913 FAP/PLAU/ABAT/F11/TSPAN8/PLAUR/PLAT/CEACAM1/SERPINB2 9

BP GO:0048705 skeletal system morphogenesis 20/532 239/18670 1.80325916499738e-05 0.00117131102777144 0.000980814332949088 COL11A1/COL1A1/COMP/GREM1/CHAD/SFRP2/COL6A3/COL12A1/PRRX1/COCH/MATN3/HOXB2/SFRP4/HOXB3/RAB23/MMP2/SERPINH1/TWIST1/HOXB7/TMEM119 20

BP GO:0038065 collagen-activated signaling pathway 5/532 13/18670 1.96302926725251e-05 0.00125633873104161 0.00105201351752759 COL1A1/ITGA2/COL4A1/ITGA11/COL4A2 5

BP GO:1901605 alpha-amino acid metabolic process 19/532 222/18670 2.12594551179506e-05 0.00132883838988025 0.00111272216180472 GNMT/GPT2/CBS/GATM/TDH/CTH/BCAT1/GCAT/GAMT/ADHFE1/MAT1A/KYNU/PHGDH/DPEP1/PSAT1/EGLN3/NOX4/SARDH/GLS2 19

BP GO:0033627 cell adhesion mediated by integrin 10/532 68/18670 2.1373779248993e-05 0.00132883838988025 0.00111272216180472 ITGA2/PLAU/SFRP2/ADAM9/FBN1/ITGB6/SNAI2/ITGA11/ITGBL1/CYP1B1 10

BP GO:0043616 keratinocyte proliferation 8/532 43/18670 2.48271448479849e-05 0.00152179907575254 0.00127430059990695 EFNB2/SFN/CDH3/REG3G/SDR16C5/CD109/SNAI2/REG3A 8

BP GO:0050819 negative regulation of coagulation 9/532 57/18670 3.08050588162303e-05 0.00186199466622547 0.00155916832780394 FAP/PLAU/ABAT/F11/TSPAN8/PLAUR/PLAT/CEACAM1/SERPINB2 9

BP GO:0071560 cellular response to transforming growth factor beta stimulus 20/532 249/18670 3.2545904837914e-05 0.00193480703346056 0.00162013882300708 POSTN/COL1A1/COL3A1/COL1A2/PBLD/ADAM9/VEPH1/LTBP1/ID1/LOX/FBN1/NOX4/AMHR2/ONECUT1/CD109/ASPN/PMEPA1/COL4A2/EMILIN1/ITGA3 20

BP GO:0010837 regulation of keratinocyte proliferation 7/532 33/18670 3.28988328299819e-05 0.00193480703346056 0.00162013882300708 EFNB2/SFN/CDH3/REG3G/CD109/SNAI2/REG3A 7

BP GO:0007229 integrin-mediated signaling pathway 12/532 103/18670 3.67094294319138e-05 0.00213012582516918 0.00178369185534436 ITGA2/COL3A1/ADAM9/THY1/ITGB6/TIMP1/FCER1G/ITGA11/ISG15/CEACAM1/ITGBL1/ITGA3 12

BP GO:0022612 gland morphogenesis 13/532 120/18670 3.82548356468721e-05 0.0021850596869104 0.00182969152382058 SULF1/FGL1/SULF2/HPN/SERPINB5/SEMA3C/CRIP1/IGFBP5/PROX1/TGM2/SNAI2/CEACAM1/GLI2 13

BP GO:0045785 positive regulation of cell adhesion 27/532 403/18670 3.86602931737365e-05 0.0021850596869104 0.00182969152382058 COL8A1/ITGA2/IGFBP2/EFNB2/CEACAM6/FN1/ZBTB16/SFRP2/ADAM9/THY1/AGR2/EPB41L4B/PAK3/LGALS1/VNN1/TGM2/MAP4K4/VTCN1/EDIL3/JUP/PRSS2/ANXA1/TNFSF4/EPO/EMILIN1/GLI2/ITGA3 27

BP GO:0006767 water-soluble vitamin metabolic process 11/532 88/18670 3.99739540290897e-05 0.00221546985445387 0.00185515592011399 CTRC/PRSS3/AOX1/CTRB2/KYNU/TCN1/PRSS1/PSAT1/VNN1/RGN/SLC2A1 11

BP GO:0061844 antimicrobial humoral immune response mediated by antimicrobial peptide 10/532 73/18670 4.0216479435169e-05 0.00221546985445387 0.00185515592011399 PLA2G1B/REG1A/CXCL10/REG1B/KRT6A/REG3G/CXCL5/KLK7/RNASE6/REG3A 10

BP GO:0046851 negative regulation of bone remodeling 5/532 15/18670 4.36856734742679e-05 0.00237650063700018 0.00198999738905152 IAPP/CLDN18/GREM1/TNFRSF11B/TMEM119 5

BP GO:1903010 regulation of bone development 6/532 24/18670 4.52203593129343e-05 0.00242961732999864 0.00203447542483923 CLDN18/GREM1/LOX/FBN1/RGN/TMEM119 6

BP GO:0046849 bone remodeling 11/532 90/18670 4.93690752807252e-05 0.00262017336124044 0.00219404029039629 IAPP/CLDN18/PDK4/GREM1/CTHRC1/CTSK/NOX4/TNFRSF11B/GJA1/SPP1/TMEM119 11

BP GO:0032102 negative regulation of response to external stimulus 25/532 365/18670 5.20851223161625e-05 0.00273101749783059 0.00228685724107235 FAP/C5/PLAU/ABAT/GREM1/PTGER4/SEMA3C/NUCB2/BACE1/F11/TSPAN8/PLAUR/NT5E/PLAT/CD109/TNFAIP6/SNAI2/GJA1/SPX/PTGIS/CEACAM1/NBL1/SPP1/SERPINB2/MICB 25

BP GO:0048732 gland development 28/532 434/18670 5.42735653064171e-05 0.00280261374551871 0.00234680940087698 SULF1/EGF/FGL1/ITGA2/REG1A/SULF2/HPN/SERPINB5/SEMA3C/CCKBR/CRIP1/IGFBP5/PROX1/HK2/LEF1/TGM2/ONECUT1/RGN/HOXB3/SNAI2/ANXA1/SERPINA5/GJA1/PITX1/OAS2/CEACAM1/PTF1A/GLI2 28

BP GO:0030510 regulation of BMP signaling pathway 11/532 91/18670 5.47385497171624e-05 0.00280261374551871 0.00234680940087698 SULF1/GREM1/GATA4/SFRP5/DKK1/SFRP2/FSTL1/FBN1/SFRP4/NBL1/ITGA3 11

BP GO:0046850 regulation of bone remodeling 8/532 48/18670 5.70170629841126e-05 0.00288532858263788 0.00241607187332923 IAPP/CLDN18/PDK4/GREM1/TNFRSF11B/GJA1/SPP1/TMEM119 8

BP GO:0007584 response to nutrient 18/532 219/18670 5.92717725360086e-05 0.00295243939661046 0.00247226808994423 POSTN/COL1A1/ITGA2/P2RX1/IGFBP2/NQO1/GATA4/SFRP2/CXCL10/SPARC/KYNU/PTGS2/SST/TNFRSF11B/SNAI2/STC2/EPO/SPP1 18

BP GO:0006882 cellular zinc ion homeostasis 7/532 36/18670 5.97000613285204e-05 0.00295243939661046 0.00247226808994423 SLC39A5/MT1G/MT1F/SLC30A2/MT1H/MT1M/SLC30A8 7

BP GO:0090101 negative regulation of transmembrane receptor protein serine/threonine kinase signaling pathway 13/532 126/18670 6.38628363578282e-05 0.00312282094190189 0.00261493955613012 GREM1/PBLD/DKK1/SFRP2/VEPH1/LTBP1/FBN1/ONECUT1/CD109/ASPN/PMEPA1/NBL1/EMILIN1 13

BP GO:0009615 response to virus 23/532 326/18670 6.58795143679576e-05 0.00318564051699279 0.00266754244142537 BNIP3/IFI27/LCN2/CXCL10/OAS1/IFI44L/MX2/MMP12/RSAD2/IFITM1/IFI16/DMBT1/BIRC3/MST1R/DUOX2/GBP3/TNFSF4/IFI44/RNASE6/ISG15/CXCR4/OAS2/MICB 23

BP GO:0008217 regulation of blood pressure 16/532 182/18670 6.81547412961949e-05 0.00325944433100044 0.00272934313901014 KLK1/POSTN/EPHX2/P2RX1/ABAT/CHGA/COL1A2/NPY1R/NPR3/ACSM3/NMU/RASL10B/PTGS2/EDNRA/GJA1/SPX 16

BP GO:0006939 smooth muscle contraction 12/532 110/18670 7.05243219918467e-05 0.00333610705770127 0.00279353778873883 SULF1/COMP/ITGA2/P2RX1/CHRM3/SULF2/ABAT/NMU/PTGS2/EDNRA/HTR2B/SPX 12

BP GO:0071711 basement membrane organization 6/532 26/18670 7.36918573514592e-05 0.00344531498922426 0.00288498463929334 LAMB3/HPN/CTSS/MMP11/COL4A1/FLRT2 6

BP GO:0002576 platelet degranulation 13/532 128/18670 7.52021304517008e-05 0.00344531498922426 0.00288498463929334 ALB/EGF/P2RX1/FN1/SPARC/PCDH7/LGALS3BP/CD109/TIMP1/F5/FCER1G/ISLR/TTN 13

BP GO:0010631 epithelial cell migration 24/532 351/18670 7.52079328989671e-05 0.00344531498922426 0.00288498463929334 PRSS3/FAP/ITGA2/S100P/GREM1/EFNB2/PBLD/SPARC/ADAM9/MMP9/ID1/S100A2/SRPX2/ANLN/PROX1/EPB41L4B/PTGS2/MAP4K4/JUP/ANXA1/CEACAM1/KRT16/CYP1B1/ITGA3 24

BP GO:0001655 urogenital system development 23/532 330/18670 7.92575350413295e-05 0.00359193347389198 0.00300775776088768 SULF1/GCNT3/SULF2/EFNB2/SERPINB5/KLF15/ZBTB16/MMP9/CEP55/CRIP1/NPHS1/LIF/PROX1/FBN1/COL4A1/UMOD/RGN/ANXA1/PDGFRB/PKHD1/HOXB7/GLI2/ITGA3 23

BP GO:0030193 regulation of blood coagulation 10/532 79/18670 8.00591789906989e-05 0.00359193347389198 0.00300775776088768 FAP/PLAU/ABAT/F11/TSPAN8/PLAUR/PLAT/FCER1G/CEACAM1/SERPINB2 10

BP GO:0007369 gastrulation 16/532 185/18670 8.28058014808992e-05 0.0036772535514783 0.00307920176935417 COL11A1/COL8A1/INHBA/ITGA2/COL5A2/LAMB3/FN1/DKK1/SFRP2/MMP9/COL5A1/COL12A1/LEF1/MMP2/COL4A2/ITGA3 16

BP GO:0090132 epithelium migration 24/532 354/18670 8.58253268134031e-05 0.00370205923984306 0.00309997317345605 PRSS3/FAP/ITGA2/S100P/GREM1/EFNB2/PBLD/SPARC/ADAM9/MMP9/ID1/S100A2/SRPX2/ANLN/PROX1/EPB41L4B/PTGS2/MAP4K4/JUP/ANXA1/CEACAM1/KRT16/CYP1B1/ITGA3 24

BP GO:2000811 negative regulation of anoikis 5/532 17/18670 8.58613493079098e-05 0.00370205923984306 0.00309997317345605 PDK4/CEACAM5/CEACAM6/SNAI2/NTRK2 5

BP GO:0055069 zinc ion homeostasis 7/532 38/18670 8.59163564393726e-05 0.00370205923984306 0.00309997317345605 SLC39A5/MT1G/MT1F/SLC30A2/MT1H/MT1M/SLC30A8 7

BP GO:0007162 negative regulation of cell adhesion 21/532 289/18670 8.94595477049313e-05 0.00381694070207707 0.00319617083750745 POSTN/FGL1/COL1A1/ABAT/ARHGDIG/TGFBI/FAM107A/SPOCK1/FXYD5/MMP12/GPNMB/LGALS1/TNFRSF21/MAP4K4/EFNA5/VTCN1/SNAI2/ANXA1/TNFSF4/CEACAM1/CYP1B1 21

BP GO:0001894 tissue homeostasis 18/532 227/18670 9.41102845032788e-05 0.00395710637692061 0.00331354060490015 ALB/IAPP/HOMER2/TFF1/AZGP1/CLDN18/PDK4/LYZ/PBLD/CDH3/CTSK/NOX4/TNFRSF11B/MUC13/TFF2/SPP1/VSIG1/TMEM119 18

BP GO:0050708 regulation of protein secretion 29/532 472/18670 9.52042744675043e-05 0.00395710637692061 0.00331354060490015 POSTN/PLA2G1B/C5/BRSK2/ABAT/CHGA/PTGER4/FN1/ANO1/ADAM9/MMP12/NMU/RSAD2/IL1RAP/TNFRSF21/MAP4K4/EFNA5/VTCN1/HTR2B/ANXA1/SLC2A1/TNFSF4/SLC30A8/CLEC5A/GJA1/TWIST1/TTN/CFTR/ABCC8 29

BP GO:0098754 detoxification 13/532 131/18670 9.54724654358144e-05 0.00395710637692061 0.00331354060490015 ALB/MT1G/MT1F/NQO1/MT1H/MT1M/GSTA1/GPX2/ALOX5AP/PTGS2/RGN/GPX8/DUOX2 13

BP GO:0006690 icosanoid metabolic process 12/532 114/18670 9.99223487679775e-05 0.00406413141904896 0.00340315958125665 PLA2G1B/EPHX2/GSTA1/MGLL/ALOX5AP/DPEP1/GGT6/PTGS2/ANXA1/PTGIS/CYP2S1/CYP1B1 12

BP GO:0060349 bone morphogenesis 12/532 114/18670 9.99223487679775e-05 0.00406413141904896 0.00340315958125665 COL1A1/COMP/SFRP2/COL6A3/COL12A1/COCH/MATN3/SFRP4/RAB23/SERPINH1/TWIST1/TMEM119 12

BP GO:0002446 neutrophil mediated immunity 30/532 499/18670 0.00010664978082133 0.00422228477513094 0.0035355915952746 PRSS3/PLA2G1B/PLAU/P2RX1/ANPEP/LCN2/S100P/PLAC8/SLPI/CEACAM6/LYZ/RAB31/OLR1/MMP9/TCN1/PLAUR/CAP1/DNASE1/CTSS/SERPINB3/VNN1/CTSB/TNFAIP6/JUP/PRSS2/FCER1G/CLEC5A/CEACAM1/CDA/MNDA 30

BP GO:0051146 striated muscle cell differentiation 21/532 293/18670 0.0001085995935168 0.00422228477513094 0.0035355915952746 COMP/CEACAM5/KRT19/GREM1/EFNB2/GATA4/DKK1/CXCL10/MYOF/NPHS1/CCNB1/IGFBP5/PROX1/LOX/NOX4/KLF5/PDGFRB/SORBS2/BHLHA15/TTN/TMEM119 21

BP GO:0002791 regulation of peptide secretion 30/532 500/18670 0.000110491404787785 0.00422228477513094 0.0035355915952746 POSTN/PLA2G1B/C5/BRSK2/ABAT/CHGA/PTGER4/FN1/ANO1/ADAM9/MMP12/NMU/RSAD2/RASL10B/IL1RAP/TNFRSF21/MAP4K4/EFNA5/VTCN1/HTR2B/ANXA1/SLC2A1/TNFSF4/SLC30A8/CLEC5A/GJA1/TWIST1/TTN/CFTR/ABCC8 30

BP GO:0090130 tissue migration 24/532 360/18670 0.000111158954619465 0.00422228477513094 0.0035355915952746 PRSS3/FAP/ITGA2/S100P/GREM1/EFNB2/PBLD/SPARC/ADAM9/MMP9/ID1/S100A2/SRPX2/ANLN/PROX1/EPB41L4B/PTGS2/MAP4K4/JUP/ANXA1/CEACAM1/KRT16/CYP1B1/ITGA3 24

BP GO:0071248 cellular response to metal ion 16/532 190/18670 0.000113406590848947 0.00422228477513094 0.0035355915952746 BNIP3/MT1G/MT1F/NQO1/MT1H/SLC41A1/MT1M/BACE1/MMP9/ALOX5AP/DPEP1/KCNK3/CCNB1/ECT2/PTGS2/SYT6 16

BP GO:0042730 fibrinolysis 6/532 28/18670 0.000114888703925802 0.00422228477513094 0.0035355915952746 FAP/PLAU/F11/PLAUR/PLAT/SERPINB2 6

BP GO:0072574 hepatocyte proliferation 5/532 18/18670 0.000116109937333094 0.00422228477513094 0.0035355915952746 FGL1/SULF2/HPN/PROX1/CEACAM1 5

BP GO:0072575 epithelial cell proliferation involved in liver morphogenesis 5/532 18/18670 0.000116109937333094 0.00422228477513094 0.0035355915952746 FGL1/SULF2/HPN/PROX1/CEACAM1 5

BP GO:0006968 cellular defense response 8/532 53/18670 0.000118215325144975 0.00422228477513094 0.0035355915952746 PNLIPRP2/LGALS3BP/UMOD/RAB23/NCF2/DCDC2/CLEC5A/MNDA 8

BP GO:0010043 response to zinc ion 8/532 53/18670 0.000118215325144975 0.00422228477513094 0.0035355915952746 MT1G/MT1F/SLC30A2/MT1H/MT1M/KCNK3/CRIP1/SLC30A8 8

BP GO:0031638 zymogen activation 8/532 53/18670 0.000118215325144975 0.00422228477513094 0.0035355915952746 KLK1/CUZD1/PRSS3/PLAU/HPN/F11/PLAT/IFI16 8

BP GO:0060346 bone trabecula formation 4/532 10/18670 0.000119402875592364 0.00422228477513094 0.0035355915952746 COL1A1/GREM1/CHAD/MMP2 4

BP GO:0006766 vitamin metabolic process 13/532 134/18670 0.00012030406987965 0.00422228477513094 0.0035355915952746 CTRC/PRSS3/AOX1/CTRB2/RBP1/KYNU/TCN1/PRSS1/PSAT1/VNN1/RGN/SNAI2/SLC2A1 13

BP GO:0030260 entry into host cell 13/532 134/18670 0.00012030406987965 0.00422228477513094 0.0035355915952746 ITGA2/ANPEP/EFNB2/TRIM59/KRT6A/SERPINB3/LGALS1/IFITM1/CTSB/TRIM31/ITGB6/CLEC5A/CXCR4 13

BP GO:0044409 entry into host 13/532 134/18670 0.00012030406987965 0.00422228477513094 0.0035355915952746 ITGA2/ANPEP/EFNB2/TRIM59/KRT6A/SERPINB3/LGALS1/IFITM1/CTSB/TRIM31/ITGB6/CLEC5A/CXCR4 13

BP GO:0051806 entry into cell of other organism involved in symbiotic interaction 13/532 134/18670 0.00012030406987965 0.00422228477513094 0.0035355915952746 ITGA2/ANPEP/EFNB2/TRIM59/KRT6A/SERPINB3/LGALS1/IFITM1/CTSB/TRIM31/ITGB6/CLEC5A/CXCR4 13

BP GO:0051828 entry into other organism involved in symbiotic interaction 13/532 134/18670 0.00012030406987965 0.00422228477513094 0.0035355915952746 ITGA2/ANPEP/EFNB2/TRIM59/KRT6A/SERPINB3/LGALS1/IFITM1/CTSB/TRIM31/ITGB6/CLEC5A/CXCR4 13

BP GO:0008652 cellular amino acid biosynthetic process 10/532 83/18670 0.000122111954838842 0.00425144981966913 0.00356001336970165 GPT2/CBS/GATM/ABAT/CTH/BCAT1/GAMT/PHGDH/PSAT1/GLS2 10

BP GO:0042133 neurotransmitter metabolic process 14/532 153/18670 0.000125229442846575 0.00432538520054202 0.00362192423671548 TDH/NQO1/ABAT/DDC/GCAT/PHGDH/PTGS2/SLC44A4/RGN/SARDH/PTGIS/SLC7A2/MOXD1/CYP1B1 14

BP GO:0050818 regulation of coagulation 10/532 84/18670 0.000135140482028025 0.00463095573059814 0.0038777981664403 FAP/PLAU/ABAT/F11/TSPAN8/PLAUR/PLAT/FCER1G/CEACAM1/SERPINB2 10

BP GO:0001101 response to acid chemical 23/532 343/18670 0.000141053170885122 0.0047702824783365 0.00399446544601416 COL1A1/ITGA2/COL3A1/PDK4/REG1A/IGFBP2/COL5A2/NQO1/COL1A2/GJB2/PTGER4/DKK1/SPARC/CCNB1/PTGS2/COL4A1/SST/MMP2/TNFSF4/GJA1/PDGFRB/NTRK2/MICB 23

BP GO:0010575 positive regulation of vascular endothelial growth factor production 6/532 29/18670 0.00014139853853525 0.0047702824783365 0.00399446544601416 SULF1/C5/SULF2/GATA4/PTGS2/CYP1B1 6

BP GO:0051546 keratinocyte migration 5/532 19/18670 0.000153902138258373 0.00511284050153006 0.00428131139132573 ADAM9/MMP9/EPB41L4B/MAP4K4/KRT16 5

BP GO:0072576 liver morphogenesis 5/532 19/18670 0.000153902138258373 0.00511284050153006 0.00428131139132573 FGL1/SULF2/HPN/PROX1/CEACAM1 5

BP GO:0002283 neutrophil activation involved in immune response 29/532 488/18670 0.000168779458937736 0.00556460761588656 0.00465960515823318 PRSS3/PLAU/P2RX1/ANPEP/LCN2/S100P/PLAC8/SLPI/CEACAM6/LYZ/RAB31/OLR1/MMP9/TCN1/PLAUR/CAP1/DNASE1/CTSS/SERPINB3/VNN1/CTSB/TNFAIP6/JUP/PRSS2/FCER1G/CLEC5A/CEACAM1/CDA/MNDA 29

BP GO:0046718 viral entry into host cell 12/532 121/18670 0.000176909662107275 0.00578880337963053 0.0048473387432955 ITGA2/ANPEP/EFNB2/TRIM59/SERPINB3/LGALS1/IFITM1/CTSB/TRIM31/ITGB6/CLEC5A/CXCR4 12

BP GO:1903011 negative regulation of bone development 4/532 11/18670 0.000183410833774266 0.0059567458849672 0.00498796784388459 CLDN18/GREM1/FBN1/RGN 4

BP GO:0019233 sensory perception of pain 11/532 104/18670 0.000185067505416659 0.0059660280264689 0.00499574038013626 IAPP/ITGA2/NPY1R/ANO1/BACE1/MGLL/NMU/PTGS2/LXN/SPX/CXCR4 11

BP GO:0007179 transforming growth factor beta receptor signaling pathway 16/532 199/18670 0.000193895992002521 0.00620467174408066 0.00519557216960315 COL3A1/COL1A2/PBLD/ADAM9/VEPH1/LTBP1/ID1/LOX/FBN1/AMHR2/ONECUT1/CD109/ASPN/PMEPA1/EMILIN1/ITGA3 16

BP GO:0034103 regulation of tissue remodeling 10/532 88/18670 0.000199613926062619 0.00627500941400353 0.00525447044100238 IAPP/CLDN18/PDK4/GREM1/GPNMB/TNFRSF11B/GJA1/CEACAM1/SPP1/TMEM119 10

BP GO:0034329 cell junction assembly 18/532 241/18670 0.00019968113537264 0.00627500941400353 0.00525447044100238 CDH11/LAMC2/ITGA2/LAMB3/CTNND2/GJB2/FN1/CDH3/FAM107A/COL17A1/THY1/CLDN3/ECT2/MAP4K4/EFNA5/JUP/SNAI2/GJA1 18

BP GO:0034104 negative regulation of tissue remodeling 5/532 20/18670 0.000200419648103514 0.00627500941400353 0.00525447044100238 IAPP/CLDN18/GREM1/TNFRSF11B/TMEM119 5

BP GO:0043903 regulation of symbiosis, encompassing mutualism through parasitism 17/532 222/18670 0.000221870832628385 0.00689701331141951 0.00577531445533435 NR5A2/IFI27/SLPI/HPN/TRIM59/OAS1/KRT6A/TOP2A/RSAD2/PROX1/LEF1/LGALS1/IFITM1/IFI16/TRIM31/ISG15/CXCR4 17

BP GO:0050982 detection of mechanical stimulus 7/532 44/18670 0.000225084054297499 0.00694727520782068 0.00581740198565093 COL11A1/ITGA2/HPN/BACE1/JUP/CXCR4/TTN 7

BP GO:0050678 regulation of epithelial cell proliferation 24/532 378/18670 0.000231683306888271 0.00710060388435038 0.00594579398404147 SULF1/REG1A/SULF2/EFNB2/PBLD/HPN/SERPINB5/SFN/CDH3/SFRP2/SPARC/ID1/MMP12/PROX1/REG3G/SGPP2/CD109/RGN/HTR2B/SNAI2/GJA1/TWIST1/CEACAM1/REG3A 24

BP GO:0042119 neutrophil activation 29/532 498/18670 0.000237364052603033 0.0072127928503717 0.00603973704721044 PRSS3/PLAU/P2RX1/ANPEP/LCN2/S100P/PLAC8/SLPI/CEACAM6/LYZ/RAB31/OLR1/MMP9/TCN1/PLAUR/CAP1/DNASE1/CTSS/SERPINB3/VNN1/CTSB/TNFAIP6/JUP/PRSS2/FCER1G/CLEC5A/CEACAM1/CDA/MNDA 29

BP GO:0002793 positive regulation of peptide secretion 20/532 288/18670 0.000239173495721333 0.0072127928503717 0.00603973704721044 POSTN/PLA2G1B/C5/ABAT/PTGER4/ANO1/ADAM9/MMP12/NMU/RASL10B/IL1RAP/VTCN1/HTR2B/TNFSF4/SLC30A8/CLEC5A/GJA1/TWIST1/TTN/CFTR 20

BP GO:0009063 cellular amino acid catabolic process 12/532 125/18670 0.000240315938259168 0.0072127928503717 0.00603973704721044 GPT2/CBS/TDH/ABAT/CTH/BCAT1/GCAT/ADHFE1/MAT1A/KYNU/SARDH/GLS2 12

BP GO:0006959 humoral immune response 23/532 356/18670 0.000242370923069339 0.00722464559724494 0.00604966211727506 PRSS3/PLA2G1B/C5/LCN2/REG1A/SLPI/CHGA/LYZ/PI3/CXCL10/REG1B/KRT6A/REG3G/C1S/DMBT1/C6/TNFRSF21/CXCL5/PRSS2/KLK7/RNASE6/REG3A/C1QC 23

BP GO:0045987 positive regulation of smooth muscle contraction 6/532 32/18670 0.000250887824486214 0.00742764498070752 0.00621964660487844 ITGA2/CHRM3/ABAT/NMU/PTGS2/SPX 6

BP GO:0030277 maintenance of gastrointestinal epithelium 5/532 21/18670 0.000256923457146641 0.00755493841555528 0.00632623761480562 TFF1/PBLD/MUC13/TFF2/VSIG1 5

BP GO:0050714 positive regulation of protein secretion 19/532 268/18670 0.000261808763345316 0.00764692441663634 0.00640326343130684 POSTN/PLA2G1B/C5/ABAT/PTGER4/ANO1/ADAM9/MMP12/NMU/IL1RAP/VTCN1/HTR2B/TNFSF4/SLC30A8/CLEC5A/GJA1/TWIST1/TTN/CFTR 19

BP GO:0051549 positive regulation of keratinocyte migration 4/532 12/18670 0.000268931301027044 0.00780259348046465 0.00653361518705704 ADAM9/MMP9/EPB41L4B/MAP4K4 4

BP GO:0055123 digestive system development 13/532 146/18670 0.000283345693883597 0.00816636066080407 0.0068382209287209 CLDN18/COL3A1/REG1A/GATA4/SFRP5/SFRP2/CCKBR/AGR2/CCNB1/KLF5/DACT1/PTF1A/GLI2 13

BP GO:0072001 renal system development 20/532 293/18670 0.000299499216638688 0.00857513546586559 0.00718051445985552 SULF1/GCNT3/SULF2/EFNB2/KLF15/ZBTB16/MMP9/CEP55/NPHS1/LIF/PROX1/FBN1/COL4A1/UMOD/RGN/PDGFRB/PKHD1/HOXB7/GLI2/ITGA3 20

BP GO:0030111 regulation of Wnt signaling pathway 23/532 363/18670 0.000320009856668382 0.00904442492268092 0.00757348081518996 SULF1/EGF/COL1A1/IGFBP2/SULF2/GREM1/CTNND2/SFRP5/CTHRC1/DKK1/CDH3/SFRP2/WNK2/LEF1/SFRP4/SHISA2/JUP/DACT1/SNAI2/SCEL/GRB10/DCDC2/ITGA3 23

BP GO:0050792 regulation of viral process 16/532 208/18670 0.000320046286326485 0.00904442492268092 0.00757348081518996 NR5A2/IFI27/SLPI/HPN/TRIM59/OAS1/TOP2A/RSAD2/PROX1/LEF1/LGALS1/IFITM1/IFI16/TRIM31/ISG15/CXCR4 16

BP GO:0009235 cobalamin metabolic process 5/532 22/18670 0.000324749842971052 0.00911813752651625 0.00763520513660973 CTRC/PRSS3/CTRB2/TCN1/PRSS1 5

BP GO:0060351 cartilage development involved in endochondral bone morphogenesis 7/532 47/18670 0.000343178246269041 0.00957379312668504 0.00801675498369379 COL1A1/COMP/COL6A3/COL12A1/COCH/MATN3/SERPINH1 7

BP GO:1903900 regulation of viral life cycle 13/532 149/18670 0.000345599246375593 0.00957573632298849 0.0080183821473941 NR5A2/IFI27/SLPI/TRIM59/OAS1/TOP2A/RSAD2/PROX1/LGALS1/IFITM1/IFI16/TRIM31/ISG15 13

BP GO:0043312 neutrophil degranulation 28/532 485/18670 0.000347648515402615 0.00957573632298849 0.0080183821473941 PRSS3/PLAU/P2RX1/ANPEP/LCN2/S100P/PLAC8/SLPI/CEACAM6/LYZ/RAB31/OLR1/MMP9/TCN1/PLAUR/CAP1/CTSS/SERPINB3/VNN1/CTSB/TNFAIP6/JUP/PRSS2/FCER1G/CLEC5A/CEACAM1/CDA/MNDA 28

BP GO:0010574 regulation of vascular endothelial growth factor production 6/532 34/18670 0.000354810835704794 0.00959848055203196 0.00803742735853683 SULF1/C5/SULF2/GATA4/PTGS2/CYP1B1 6

BP GO:0042303 molting cycle 11/532 112/18670 0.000355090847628021 0.00959848055203196 0.00803742735853683 INHBA/DKK1/CDH3/IGFBP5/PTGS2/CD109/KRT17/EPS8L3/FOXQ1/LRIG1/KRT16 11

BP GO:0042633 hair cycle 11/532 112/18670 0.000355090847628021 0.00959848055203196 0.00803742735853683 INHBA/DKK1/CDH3/IGFBP5/PTGS2/CD109/KRT17/EPS8L3/FOXQ1/LRIG1/KRT16 11

BP GO:0045453 bone resorption 8/532 62/18670 0.000360458414675926 0.00963226316073728 0.00806571571750979 IAPP/CLDN18/PDK4/CTSK/NOX4/TNFRSF11B/SPP1/TMEM119 8

BP GO:2000027 regulation of animal organ morphogenesis 18/532 253/18670 0.000361217348505984 0.00963226316073728 0.00806571571750979 SULF1/SULF2/GREM1/HPN/CTHRC1/CHAD/DKK1/SEMA3C/SFRP2/LIF/GPC6/TNFRSF11B/DACT1/SNAI2/ASPN/TWIST1/CEACAM1/HOXB7 18

BP GO:0072330 monocarboxylic acid biosynthetic process 22/532 343/18670 0.000362980505138078 0.00963226316073728 0.00806571571750979 VCAN/PLA2G1B/ACADL/EPHX2/PDK4/ABAT/RBP1/MGLL/ALOX5AP/ENO2/ACSM3/PROX1/HK2/PTGS2/OSBPL3/RGN/ANXA1/BGN/PTGIS/CRABP2/CEACAM1/DHRS9 22

BP GO:0045069 regulation of viral genome replication 10/532 95/18670 0.000374289989225931 0.00983686055030605 0.00823703831877892 NR5A2/IFI27/SLPI/OAS1/TOP2A/RSAD2/PROX1/IFITM1/IFI16/ISG15 10

BP GO:0010839 negative regulation of keratinocyte proliferation 4/532 13/18670 0.000379731749184609 0.00983686055030605 0.00823703831877892 EFNB2/SFN/CD109/SNAI2 4

BP GO:0045779 negative regulation of bone resorption 4/532 13/18670 0.000379731749184609 0.00983686055030605 0.00823703831877892 IAPP/CLDN18/TNFRSF11B/TMEM119 4

BP GO:0061430 bone trabecula morphogenesis 4/532 13/18670 0.000379731749184609 0.00983686055030605 0.00823703831877892 COL1A1/GREM1/CHAD/MMP2 4

BP GO:0045933 positive regulation of muscle contraction 7/532 48/18670 0.00039203503365915 0.0100954820502048 0.00845359879494223 ITGA2/CHRM3/ABAT/CHGA/NMU/PTGS2/SPX 7

BP GO:0071294 cellular response to zinc ion 5/532 23/18670 0.000405306002182441 0.0103758336558705 0.00868835529136601 MT1G/MT1F/MT1H/MT1M/KCNK3 5

BP GO:0030282 bone mineralization 11/532 114/18670 0.000413776585544463 0.0105307350894123 0.00881806426072596 COMP/GREM1/COL1A2/PTGS2/LOX/GPNMB/ASPN/GJA1/TWIST1/ISG15/TMEM119 11

BP GO:0110111 negative regulation of animal organ morphogenesis 6/532 35/18670 0.00041802160127794 0.0105769186555907 0.00885673674188634 SULF1/GREM1/CHAD/TNFRSF11B/ASPN/CEACAM1 6

BP GO:0070482 response to oxygen levels 24/532 394/18670 0.000423967300449544 0.0106653508182452 0.00893078670006888 POSTN/BNIP3/COL1A1/ITGA2/PLAU/REG1A/ABAT/CLDN3/KCNK3/CCNB1/HK2/PTGS2/PLAT/EGLN3/EDNRA/NOX4/SLC2A1/STC2/MMP2/PTGIS/TWIST1/PDGFRB/CXCR4/EPO 24

BP GO:0048565 digestive tract development 12/532 134/18670 0.000456435760874356 0.0114161404099149 0.00955947128945567 CLDN18/COL3A1/REG1A/GATA4/SFRP5/SFRP2/CCKBR/AGR2/CCNB1/KLF5/DACT1/GLI2 12

BP GO:0030512 negative regulation of transforming growth factor beta receptor signaling pathway 9/532 81/18670 0.00048830717165924 0.011932208857573 0.00999160871345728 PBLD/VEPH1/LTBP1/FBN1/ONECUT1/CD109/ASPN/PMEPA1/EMILIN1 9

BP GO:0010573 vascular endothelial growth factor production 6/532 36/18670 0.000489685909267826 0.011932208857573 0.00999160871345728 SULF1/C5/SULF2/GATA4/PTGS2/CYP1B1 6

BP GO:0055074 calcium ion homeostasis 27/532 471/18670 0.000491822876257339 0.011932208857573 0.00999160871345728 IAPP/PLA2G1B/BNIP3/EPHX2/P2RX1/REG1A/SCGN/MCOLN3/PTGER4/CXCL10/CCKBR/THY1/KCNK3/NMU/SLC8A2/EDNRA/TGM2/SLC24A3/RGN/HTR2B/GNA15/STC2/TRPV6/GJA1/PKHD1/CXCR4/EPO 27

BP GO:0051048 negative regulation of secretion 17/532 238/18670 0.000498458433998245 0.011932208857573 0.00999160871345728 EGF/INHBA/ABAT/CHGA/PTGER4/FN1/STXBP6/LIF/NMU/RSAD2/TNFRSF21/MAP4K4/ANXA1/SPX/TFF2/PLA2R1/CEACAM1 17

BP GO:0051607 defense response to virus 17/532 238/18670 0.000498458433998245 0.011932208857573 0.00999160871345728 BNIP3/IFI27/CXCL10/OAS1/IFI44L/MX2/MMP12/RSAD2/IFITM1/IFI16/DMBT1/BIRC3/GBP3/RNASE6/ISG15/OAS2/MICB 17

BP GO:0003433 chondrocyte development involved in endochondral bone morphogenesis 5/532 24/18670 0.000500065381884942 0.011932208857573 0.00999160871345728 COL6A3/COL12A1/COCH/MATN3/SERPINH1 5

BP GO:2000209 regulation of anoikis 5/532 24/18670 0.000500065381884942 0.011932208857573 0.00999160871345728 PDK4/CEACAM5/CEACAM6/SNAI2/NTRK2 5

BP GO:0016485 protein processing 21/532 328/18670 0.000501744995619453 0.011932208857573 0.00999160871345728 KLK1/CUZD1/CTSE/PRSS3/C5/COMP/PLAU/CHAC1/AEBP1/HPN/F11/SEC11C/CTSS/SPON1/PLAT/C1S/IFI16/BIRC3/C6/ADAMTS2/C1QC 21

BP GO:0019058 viral life cycle 21/532 328/18670 0.000501744995619453 0.011932208857573 0.00999160871345728 NR5A2/IFI27/ITGA2/ANPEP/EFNB2/SLPI/TRIM59/OAS1/TOP2A/RSAD2/PROX1/SERPINB3/LGALS1/IFITM1/IFI16/CTSB/TRIM31/ITGB6/CLEC5A/ISG15/CXCR4 21

BP GO:0071241 cellular response to inorganic substance 16/532 217/18670 0.000511598265665703 0.0121004111531366 0.0101324553531731 BNIP3/MT1G/MT1F/NQO1/MT1H/SLC41A1/MT1M/BACE1/MMP9/ALOX5AP/DPEP1/KCNK3/CCNB1/ECT2/PTGS2/SYT6 16

BP GO:0050667 homocysteine metabolic process 4/532 14/18670 0.000519695930030567 0.0121597671370593 0.0101821579500047 CBS/CTH/DPEP1/NOX4 4

BP GO:0051547 regulation of keratinocyte migration 4/532 14/18670 0.000519695930030567 0.0121597671370593 0.0101821579500047 ADAM9/MMP9/EPB41L4B/MAP4K4 4

BP GO:0050900 leukocyte migration 28/532 499/18670 0.000544972722225067 0.0126830015354197 0.0106202958870993 PLA2G1B/COL1A1/C5/ITGA2/CEACAM5/MMP1/GREM1/CCL20/CHGA/CEACAM6/COL1A2/PTGER4/FN1/PLA2G7/CXCL10/OLR1/CCL18/THY1/GRB14/UMOD/CXCL5/ANXA1/FCER1G/CXCR4/CEACAM1/NBL1/EMILIN1/ITGA3 28

BP GO:1901607 alpha-amino acid biosynthetic process 8/532 66/18670 0.000554425794768739 0.012834367334221 0.0107470442412619 CBS/GATM/CTH/BCAT1/GAMT/PHGDH/PSAT1/GLS2 8

BP GO:0048762 mesenchymal cell differentiation 16/532 219/18670 0.000565497105333394 0.0130213936635499 0.0109036534595612 COL1A1/GREM1/PBLD/HPN/FN1/SEMA3C/SFRP2/FAM83D/SERPINB3/LEF1/EDNRA/S100A4/HTR2B/SNAI2/NRTN/TWIST1 16

BP GO:0032941 secretion by tissue 6/532 37/18670 0.000570559758331295 0.0130688214118831 0.0109433677747531 CEL/CHRM3/NPR3/AGR2/GJA1/SYTL2 6

BP GO:1903845 negative regulation of cellular response to transforming growth factor beta stimulus 9/532 83/18670 0.000585135348462806 0.0133325080445557 0.0111641696135477 PBLD/VEPH1/LTBP1/FBN1/ONECUT1/CD109/ASPN/PMEPA1/EMILIN1 9

BP GO:0051047 positive regulation of secretion 25/532 428/18670 0.000600183157708448 0.0136041515747248 0.0113916342762426 POSTN/PLA2G1B/C5/INHBA/ABAT/PTGER4/ANO1/ADAM9/MMP12/NMU/RASL10B/IL1RAP/VTCN1/HTR2B/FCER1G/TNFSF4/SLC30A8/CLEC5A/GJA1/TWIST1/SYTL2/PLA2R1/SPP1/TTN/CFTR 25

BP GO:0017015 regulation of transforming growth factor beta receptor signaling pathway 11/532 120/18670 0.000640704216201204 0.0144473821186924 0.012097725642152 PBLD/VEPH1/LTBP1/LOX/FBN1/ONECUT1/CD109/ASPN/PMEPA1/EMILIN1/ITGA3 11

BP GO:0009913 epidermal cell differentiation 22/532 358/18670 0.000646374587667806 0.0145001144614964 0.0121418818367116 KRT19/MCOLN3/SFN/CDH3/PI3/ADAM9/KRT6A/CTSK/PALLD/REG3G/SLC44A4/SFRP4/CD109/JUP/ANXA1/KRT17/SCEL/KRT7/CSTA/REG3A/KRT16/KRT23 22

BP GO:0001666 response to hypoxia 22/532 359/18670 0.000670727440310222 0.0149692606165645 0.0125347281962429 POSTN/BNIP3/ITGA2/PLAU/REG1A/ABAT/CLDN3/KCNK3/CCNB1/HK2/PTGS2/PLAT/EGLN3/EDNRA/NOX4/SLC2A1/STC2/MMP2/PTGIS/TWIST1/CXCR4/EPO 22

BP GO:0010812 negative regulation of cell-substrate adhesion 8/532 68/18670 0.000679015853776021 0.0150769234471084 0.0126248812340096 POSTN/COL1A1/FAM107A/SPOCK1/MMP12/LGALS1/MAP4K4/EFNA5 8

BP GO:0007596 blood coagulation 21/532 336/18670 0.000685568228265217 0.015145141773656 0.0126820048423948 FAP/COL1A1/COMP/ITGA2/PLAU/COL3A1/P2RX1/ABAT/GATA4/COL1A2/ENTPD1/F11/TSPAN8/PLAUR/PLAT/F5/GNA15/SERPINA5/FCER1G/CEACAM1/SERPINB2 21

BP GO:0010273 detoxification of copper ion 4/532 15/18670 0.000692790568778311 0.0151508771624282 0.0126868074536393 MT1G/MT1F/MT1H/MT1M 4

BP GO:1990169 stress response to copper ion 4/532 15/18670 0.000692790568778311 0.0151508771624282 0.0126868074536393 MT1G/MT1F/MT1H/MT1M 4

BP GO:1903901 negative regulation of viral life cycle 9/532 85/18670 0.000697138799804524 0.0151697402837464 0.012702602762754 SLPI/TRIM59/OAS1/RSAD2/PROX1/IFITM1/IFI16/TRIM31/ISG15 9

BP GO:0006575 cellular modified amino acid metabolic process 15/532 202/18670 0.00070398138373193 0.0152424227960267 0.0127634645220212 GNMT/PLA2G1B/ACADL/GATM/CHAC1/GSTA1/HPN/GAMT/DPEP1/GGT6/EGLN3/VNN1/GSTA2/DUOX2/SARDH 15

BP GO:0006874 cellular calcium ion homeostasis 26/532 458/18670 0.000717523985264241 0.0154587345736137 0.0129445963365545 IAPP/PLA2G1B/BNIP3/EPHX2/P2RX1/SCGN/MCOLN3/PTGER4/CXCL10/CCKBR/THY1/KCNK3/NMU/SLC8A2/EDNRA/TGM2/SLC24A3/RGN/HTR2B/GNA15/STC2/TRPV6/GJA1/PKHD1/CXCR4/EPO 26

BP GO:1903844 regulation of cellular response to transforming growth factor beta stimulus 11/532 122/18670 0.000736221401031717 0.015699627235296 0.0131463113120633 PBLD/VEPH1/LTBP1/LOX/FBN1/ONECUT1/CD109/ASPN/PMEPA1/EMILIN1/ITGA3 11

BP GO:0045992 negative regulation of embryonic development 5/532 26/18670 0.000738389173935686 0.015699627235296 0.0131463113120633 SULF1/COL5A2/DKK1/SFRP2/COL5A1 5

BP GO:0030278 regulation of ossification 15/532 203/18670 0.000740739687336594 0.015699627235296 0.0131463113120633 COMP/GREM1/CTHRC1/PTGER4/DKK1/ZBTB16/SFRP2/ID1/IGFBP5/IFITM1/SNAI2/GJA1/TWIST1/ISG15/TMEM119 15

BP GO:0016049 cell growth 27/532 484/18670 0.000743134928876602 0.015699627235296 0.0131463113120633 POSTN/INHBA/REG1A/NRCAM/GATA4/IGFBP3/HPN/SFN/FN1/SEMA3C/SFRP2/FAM107A/SPOCK1/IGFBP5/TMEM97/LEF1/SLC44A4/EFNA5/PRSS2/KRT17/GJA1/CRABP2/SORBS2/CXCR4/CEACAM1/SPP1/CDA 27

BP GO:0003333 amino acid transmembrane transport 9/532 86/18670 0.000759367384168008 0.0159650572748752 0.0133685730179997 SLC6A14/SLC3A1/SLC16A10/SLC38A5/SLC38A3/SLC25A15/SLC43A1/SLC6A6/SLC7A2 9

BP GO:0071496 cellular response to external stimulus 21/532 339/18670 0.000768193887234273 0.0160729797944402 0.013458943510147 ALB/SLC39A5/POSTN/BNIP3/COL1A1/ITGA2/CBS/PDK4/LCN2/PTGER4/SFRP2/FAM107A/SLC38A3/MMP7/PTGS2/KIAA1324/IFI16/SNAI2/SLC2A1/GJA1/BHLHA15 21

BP GO:0031214 biomineral tissue development 13/532 163/18670 0.000812795007518246 0.0169248032187531 0.0141722302494494 COL1A1/COMP/GREM1/COL1A2/PTGS2/LOX/GPNMB/ASPN/GJA1/TWIST1/ISG15/SPP1/TMEM119 13

BP GO:0010517 regulation of phospholipase activity 8/532 70/18670 0.000825235276100901 0.0170767797877668 0.0142994900409367 PLA2G1B/EDNRA/HTR2B/GNA15/ANXA1/PDGFRB/PLA2R1/NTRK2 8

BP GO:0007599 hemostasis 21/532 341/18670 0.000827941299452849 0.0170767797877668 0.0142994900409367 FAP/COL1A1/COMP/ITGA2/PLAU/COL3A1/P2RX1/ABAT/GATA4/COL1A2/ENTPD1/F11/TSPAN8/PLAUR/PLAT/F5/GNA15/SERPINA5/FCER1G/CEACAM1/SERPINB2 21

BP GO:0050817 coagulation 21/532 342/18670 0.000859290518183257 0.0176397751657242 0.0147709224128621 FAP/COL1A1/COMP/ITGA2/PLAU/COL3A1/P2RX1/ABAT/GATA4/COL1A2/ENTPD1/F11/TSPAN8/PLAUR/PLAT/F5/GNA15/SERPINA5/FCER1G/CEACAM1/SERPINB2 21

BP GO:0019835 cytolysis 6/532 40/18670 0.000876460762819337 0.017824099251354 0.0149252688680794 C5/LYZ/KRT6A/REG3G/C6/MICB 6

BP GO:0045124 regulation of bone resorption 6/532 40/18670 0.000876460762819337 0.017824099251354 0.0149252688680794 IAPP/CLDN18/PDK4/TNFRSF11B/SPP1/TMEM119 6

BP GO:0042136 neurotransmitter biosynthetic process 10/532 106/18670 0.000893592660821846 0.0180879779530078 0.0151462315386303 NQO1/ABAT/DDC/PTGS2/SLC44A4/RGN/PTGIS/SLC7A2/MOXD1/CYP1B1 10

BP GO:0001558 regulation of cell growth 24/532 416/18670 0.000909733226850393 0.018173212198667 0.0152176036744836 INHBA/REG1A/NRCAM/IGFBP3/HPN/SFN/FN1/SEMA3C/SFRP2/FAM107A/SPOCK1/IGFBP5/TMEM97/LEF1/SLC44A4/EFNA5/PRSS2/KRT17/GJA1/CRABP2/CXCR4/CEACAM1/SPP1/CDA 24

BP GO:0044273 sulfur compound catabolic process 7/532 55/18670 0.000910301733282245 0.018173212198667 0.0152176036744836 VCAN/CBS/CHAC1/CTH/LUM/MAT1A/BGN 7

BP GO:0050954 sensory perception of mechanical stimulus 13/532 165/18670 0.000910330941936903 0.018173212198667 0.0152176036744836 HOMER2/COL11A1/COL1A1/ITGA2/HPN/GJB2/BACE1/COCH/SNAI2/DCDC2/CXCR4/EPYC/LRIG1 13

BP GO:0006865 amino acid transport 12/532 145/18670 0.000923834017203255 0.0183585645793085 0.0153728111874918 SLC6A14/ABAT/SLC3A1/SLC16A10/SLC38A5/SLC38A3/SLC25A15/SLC43A1/SLC6A6/GLS2/SLC7A2/NTRK2 12

BP GO:0007568 aging 20/532 321/18670 0.00094703928978396 0.0187341590415445 0.0156873206757515 COMP/IGFBP2/NQO1/ABAT/DDC/GJB2/DKK1/KYNU/MMP7/IGFBP5/PTGS2/NOX4/TIMP1/RGN/TWIST1/PDGFRB/EPO/PLA2R1/KRT16/COL4A2 20

BP GO:0051222 positive regulation of protein transport 24/532 418/18670 0.00097160847899061 0.0191332131247382 0.0160214744189831 POSTN/PLA2G1B/C5/ABAT/SFN/PTGER4/ANO1/ADAM9/ECT2/MMP12/NMU/PTGS2/IL1RAP/VTCN1/PDZK1/JUP/HTR2B/TNFSF4/SLC30A8/CLEC5A/GJA1/TWIST1/TTN/CFTR 24

BP GO:0009914 hormone transport 20/532 322/18670 0.000983690224161552 0.019283873223203 0.0161476318447003 INHBA/BRSK2/FAM3B/ABAT/CHGA/SLC16A10/ANO1/LIF/NMU/RASL10B/SLC44A4/MAP4K4/EFNA5/ANXA1/SLC2A1/SLC30A8/GJA1/SPP1/CFTR/ABCC8 20

BP GO:0036293 response to decreased oxygen levels 22/532 370/18670 0.00099581820471322 0.019434084425614 0.0162734133807749 POSTN/BNIP3/ITGA2/PLAU/REG1A/ABAT/CLDN3/KCNK3/CCNB1/HK2/PTGS2/PLAT/EGLN3/EDNRA/NOX4/SLC2A1/STC2/MMP2/PTGIS/TWIST1/CXCR4/EPO 22

BP GO:1901568 fatty acid derivative metabolic process 13/532 167/18670 0.0010174920269511 0.0197684165236214 0.0165533712279357 PLA2G1B/EPHX2/GSTA1/MGLL/ALOX5AP/DPEP1/GGT6/ACSL5/PTGS2/ANXA1/PTGIS/CYP2S1/CYP1B1 13

BP GO:0046916 cellular transition metal ion homeostasis 10/532 108/18670 0.00103286621591282 0.0199779278740114 0.0167288086058019 SLC39A5/MT1G/MT1F/SLC30A2/CP/LCN2/MT1H/MT1M/HEPH/SLC30A8 10

BP GO:0097529 myeloid leukocyte migration 15/532 210/18670 0.00104660357326224 0.0201540652691914 0.0168762998166459 PLA2G1B/C5/GREM1/CCL20/CHGA/PTGER4/PLA2G7/CXCL10/CCL18/UMOD/CXCL5/ANXA1/FCER1G/NBL1/EMILIN1 15

BP GO:0001822 kidney development 18/532 278/18670 0.0010863600909263 0.0206637468608429 0.0173030891138347 SULF1/GCNT3/SULF2/EFNB2/KLF15/ZBTB16/MMP9/NPHS1/LIF/PROX1/FBN1/UMOD/RGN/PDGFRB/PKHD1/HOXB7/GLI2/ITGA3 18

BP GO:0060485 mesenchyme development 18/532 278/18670 0.0010863600909263 0.0206637468608429 0.0173030891138347 COL1A1/GREM1/GATA4/PBLD/HPN/FN1/SEMA3C/SFRP2/FAM83D/SERPINB3/LEF1/EDNRA/S100A4/HTR2B/SNAI2/NRTN/TWIST1/PDGFRB 18

BP GO:0060350 endochondral bone morphogenesis 8/532 73/18670 0.00109092975750609 0.0206637468608429 0.0173030891138347 COL1A1/COMP/COL6A3/COL12A1/COCH/MATN3/SERPINH1/TMEM119 8

BP GO:0051604 protein maturation 23/532 397/18670 0.00109206382766403 0.0206637468608429 0.0173030891138347 KLK1/CUZD1/CTSE/PRSS3/C5/COMP/PLAU/CHAC1/AEBP1/HPN/F11/LMF2/SEC11C/CTSS/SPON1/PLAT/C1S/IFI16/BIRC3/C6/ADAMTS2/SERPINH1/C1QC 23

BP GO:0090596 sensory organ morphogenesis 17/532 256/18670 0.00112422906831188 0.0211802809752957 0.0177356164707028 COL11A1/COL8A1/COL5A2/HPN/CTHRC1/COL5A1/THY1/MFAP2/PROX1/PRRX1/FBN1/SLC44A4/TWIST1/NTRK2/LRIG1/PTF1A/GLI2 17

BP GO:0009070 serine family amino acid biosynthetic process 4/532 17/18670 0.001154472925887 0.0214712229635052 0.0179792409780513 CBS/CTH/PHGDH/PSAT1 4

BP GO:0061687 detoxification of inorganic compound 4/532 17/18670 0.001154472925887 0.0214712229635052 0.0179792409780513 MT1G/MT1F/MT1H/MT1M 4

BP GO:0097501 stress response to metal ion 4/532 17/18670 0.001154472925887 0.0214712229635052 0.0179792409780513 MT1G/MT1F/MT1H/MT1M 4

BP GO:1903532 positive regulation of secretion by cell 23/532 399/18670 0.00116700896795308 0.0216120128873694 0.0180971334694448 POSTN/PLA2G1B/C5/INHBA/ABAT/PTGER4/ANO1/ADAM9/MMP12/NMU/RASL10B/IL1RAP/VTCN1/HTR2B/FCER1G/TNFSF4/SLC30A8/CLEC5A/GJA1/TWIST1/SPP1/TTN/CFTR 23

BP GO:2000117 negative regulation of cysteine-type endopeptidase activity 9/532 92/18670 0.00123466817829203 0.0224369109783761 0.0187878738891104 SFN/SFRP2/MMP9/DPEP1/PLAUR/LEF1/PTGS2/IFI16/BIRC3 9

BP GO:0006929 substrate-dependent cell migration 5/532 29/18670 0.00124248518974923 0.0224369109783761 0.0187878738891104 CUZD1/ITGA2/FN1/SNAI2/ITGA11 5

BP GO:0010669 epithelial structure maintenance 5/532 29/18670 0.00124248518974923 0.0224369109783761 0.0187878738891104 TFF1/PBLD/MUC13/TFF2/VSIG1 5

BP GO:0050974 detection of mechanical stimulus involved in sensory perception 5/532 29/18670 0.00124248518974923 0.0224369109783761 0.0187878738891104 COL11A1/ITGA2/HPN/BACE1/CXCR4 5

BP GO:0060536 cartilage morphogenesis 5/532 29/18670 0.00124248518974923 0.0224369109783761 0.0187878738891104 COL6A3/COL12A1/COCH/MATN3/SNAI2 5

BP GO:0071280 cellular response to copper ion 5/532 29/18670 0.00124248518974923 0.0224369109783761 0.0187878738891104 MT1G/MT1F/MT1H/MT1M/BACE1 5

BP GO:0035904 aorta development 7/532 58/18670 0.00125347007168351 0.0224702581858753 0.0188157976585479 COL3A1/EFNB2/LTBP1/PROX1/LOX/PDGFRB/LOXL1 7

BP GO:0006979 response to oxidative stress 25/532 451/18670 0.00125801343567628 0.0224702581858753 0.0188157976585479 BNIP3/COL1A1/LCN2/NQO1/GATA4/GJB2/GPX2/ADAM9/MMP9/DPEP1/ECT2/PTGS2/VNN1/NOX4/RGN/GPX8/DUOX2/ANXA1/STC2/MMP2/NCF2/PDGFRB/PLA2R1/MICB/CYP1B1 25

BP GO:0030216 keratinocyte differentiation 19/532 305/18670 0.00125982146078897 0.0224702581858753 0.0188157976585479 KRT19/SFN/CDH3/PI3/ADAM9/KRT6A/CTSK/PALLD/REG3G/CD109/JUP/ANXA1/KRT17/SCEL/KRT7/CSTA/REG3A/KRT16/KRT23 19

BP GO:0000096 sulfur amino acid metabolic process 6/532 43/18670 0.00129533367209174 0.0230093556773195 0.0192672187874613 GNMT/CBS/CTH/MAT1A/DPEP1/NOX4 6

BP GO:0045071 negative regulation of viral genome replication 7/532 59/18670 0.00138791832209249 0.0245537420233598 0.020560433166813 SLPI/OAS1/RSAD2/PROX1/IFITM1/IFI16/ISG15 7

BP GO:0001659 temperature homeostasis 13/532 173/18670 0.00140418657399732 0.0247409715386087 0.020717212525799 ACADL/GATM/LCN2/PLAC8/ABAT/NPR3/ID1/MFAP2/NMU/PTGS2/GRB10/GJA1/CXCR4 13

BP GO:0043900 regulation of multi-organism process 23/532 405/18670 0.00141902163350702 0.024901540923478 0.0208516676366778 NR5A2/IFI27/INHBA/SLPI/HPN/TRIM59/OAS1/KRT6A/TOP2A/MMP12/RSAD2/PROX1/LEF1/LGALS1/IFITM1/IFI16/BIRC3/TRIM31/TIMP1/KLK7/ISG15/CXCR4/MICB 23

BP GO:0003414 chondrocyte morphogenesis involved in endochondral bone morphogenesis 4/532 18/18670 0.00145114806547383 0.0249550662464385 0.0208964878447102 COL6A3/COL12A1/COCH/MATN3 4

BP GO:0003429 growth plate cartilage chondrocyte morphogenesis 4/532 18/18670 0.00145114806547383 0.0249550662464385 0.0208964878447102 COL6A3/COL12A1/COCH/MATN3 4

BP GO:0010832 negative regulation of myotube differentiation 4/532 18/18670 0.00145114806547383 0.0249550662464385 0.0208964878447102 CEACAM5/CXCL10/BHLHA15/TMEM119 4

BP GO:0090171 chondrocyte morphogenesis 4/532 18/18670 0.00145114806547383 0.0249550662464385 0.0208964878447102 COL6A3/COL12A1/COCH/MATN3 4

BP GO:0003413 chondrocyte differentiation involved in endochondral bone morphogenesis 5/532 30/18670 0.0014564767524346 0.0249550662464385 0.0208964878447102 COL6A3/COL12A1/COCH/MATN3/SERPINH1 5

BP GO:0061037 negative regulation of cartilage development 5/532 30/18670 0.0014564767524346 0.0249550662464385 0.0208964878447102 GREM1/CTSK/ADAMTS12/SNAI2/GLI2 5

BP GO:0018149 peptide cross-linking 7/532 60/18670 0.00153336510326867 0.0261694310957854 0.0219133539216353 COL3A1/FN1/PI3/TGM2/ANXA1/BGN/CSTA 7

BP GO:0060337 type I interferon signaling pathway 9/532 95/18670 0.00154934342516783 0.0262363524759937 0.0219693915131313 IFI27/OAS1/MX2/GBP2/MMP12/RSAD2/IFITM1/ISG15/OAS2 9

BP GO:0071357 cellular response to type I interferon 9/532 95/18670 0.00154934342516783 0.0262363524759937 0.0219693915131313 IFI27/OAS1/MX2/GBP2/MMP12/RSAD2/IFITM1/ISG15/OAS2 9

BP GO:1990845 adaptive thermogenesis 12/532 154/18670 0.00155560280961363 0.026240245842785 0.0219726516804667 ACADL/GATM/LCN2/PLAC8/NPR3/ID1/PM20D1/MFAP2/GRB10/GJA1/CXCR4/SCTR 12

BP GO:0051271 negative regulation of cellular component movement 22/532 384/18670 0.00159914593368139 0.0268705911327468 0.0225004804812233 SULF1/C5/COL3A1/GREM1/IGFBP3/PBLD/PTGER4/DPYSL3/SEMA3C/SFRP2/THY1/DPEP1/IGFBP5/IFITM1/TIMP1/RGN/JUP/PKHD1/NBL1/KRT16/EMILIN1/CYP1B1 22

BP GO:0098656 anion transmembrane transport 18/532 288/18670 0.00161378730036918 0.0270123166584872 0.0226191564124619 GABRP/SLC6A14/SLC4A4/SLC3A1/SLC16A10/SLC38A5/ANO1/SLC38A3/SLC25A15/SLC43A1/FXYD3/SLC44A4/TTYH1/SLC24A3/SLC6A6/SLC7A2/CFTR/CLIC3 18

BP GO:0006936 muscle contraction 21/532 360/18670 0.00162604185566978 0.0271131576853444 0.0227035971136471 SULF1/COMP/ITGA2/P2RX1/CHRM3/SULF2/ABAT/GATA4/CHGA/GAMT/KCNJ5/MYOF/NMU/PTGS2/EDNRA/JUP/HTR2B/GJA1/SPX/CXCR4/TTN 21

BP GO:0046879 hormone secretion 19/532 312/18670 0.00163666679957516 0.0271861599685156 0.0227647266377227 INHBA/BRSK2/FAM3B/ABAT/CHGA/ANO1/LIF/NMU/RASL10B/SLC44A4/MAP4K4/EFNA5/ANXA1/SLC2A1/SLC30A8/GJA1/SPP1/CFTR/ABCC8 19

BP GO:0042692 muscle cell differentiation 22/532 385/18670 0.00165219704371874 0.0273397776968212 0.0228933606778238 COMP/CEACAM5/KRT19/GREM1/EFNB2/GATA4/CTH/DKK1/CXCL10/MYOF/NPHS1/CCNB1/IGFBP5/PROX1/LOX/NOX4/KLF5/PDGFRB/SORBS2/BHLHA15/TTN/TMEM119 22

BP GO:0002526 acute inflammatory response 15/532 220/18670 0.00166357665950355 0.0274238091748464 0.0229637256586973 C5/FN1/C2CD4B/DNASE1/OSMR/REG3G/PTGS2/C1S/VNN1/C6/FCER1G/TNFSF4/EPO/REG3A/C1QC 15

BP GO:0046883 regulation of hormone secretion 17/532 266/18670 0.00169847734173206 0.027893484495162 0.0233570151224484 INHBA/BRSK2/ABAT/CHGA/ANO1/LIF/NMU/RASL10B/MAP4K4/EFNA5/ANXA1/SLC2A1/SLC30A8/GJA1/SPP1/CFTR/ABCC8 17

BP GO:0043434 response to peptide hormone 24/532 436/18670 0.00171294302729886 0.0280252934391151 0.0234673872596306 PLA2G1B/TFF1/COL1A1/PDK4/REG1A/GJB2/BTG2/KLF15/RAB31/SPARC/REG1B/GRB14/IGFBP5/REG3G/PTGS2/FBN1/TIMP1/ANXA1/SLC2A1/STC2/GRB10/GJA1/CEACAM1/REG3A 24

BP GO:0034330 cell junction organization 18/532 290/18670 0.00174184950013517 0.0283914944741133 0.0237740310249081 CDH11/LAMC2/ITGA2/LAMB3/CTNND2/GJB2/FN1/CDH3/FAM107A/COL17A1/THY1/CLDN3/ECT2/MAP4K4/EFNA5/JUP/SNAI2/GJA1 18

BP GO:0007044 cell-substrate junction assembly 9/532 97/18670 0.00179272348970843 0.0288593856863711 0.0241658265398163 LAMC2/ITGA2/LAMB3/FN1/FAM107A/COL17A1/THY1/MAP4K4/EFNA5 9

BP GO:0003422 growth plate cartilage morphogenesis 4/532 19/18670 0.00179708031273129 0.0288593856863711 0.0241658265398163 COL6A3/COL12A1/COCH/MATN3 4

BP GO:0044241 lipid digestion 4/532 19/18670 0.00179708031273129 0.0288593856863711 0.0241658265398163 PNLIPRP2/CLPS/CEL/PNLIP 4

BP GO:0060973 cell migration involved in heart development 4/532 19/18670 0.00179708031273129 0.0288593856863711 0.0241658265398163 SEMA3C/SNAI2/TWIST1/PDGFRB 4

BP GO:0071260 cellular response to mechanical stimulus 8/532 79/18670 0.00182546639378213 0.029207462300514 0.0244572935575609 BNIP3/COL1A1/ITGA2/PTGER4/MMP7/PTGS2/SLC2A1/GJA1 8

BP GO:0048736 appendage development 13/532 179/18670 0.00190586630944739 0.0302017192025399 0.0252898490419875 COMP/GREM1/DKK1/ZBTB16/SEMA3C/SFRP2/LEF1/PRRX1/GJA1/TWIST1/CRABP2/PITX1/GLI2 13

BP GO:0060173 limb development 13/532 179/18670 0.00190586630944739 0.0302017192025399 0.0252898490419875 COMP/GREM1/DKK1/ZBTB16/SEMA3C/SFRP2/LEF1/PRRX1/GJA1/TWIST1/CRABP2/PITX1/GLI2 13

BP GO:0003012 muscle system process 25/532 465/18670 0.00190842664997667 0.0302017192025399 0.0252898490419875 SULF1/COMP/ITGA2/P2RX1/GATM/CHRM3/SULF2/ABAT/GATA4/CHGA/KLF15/GAMT/KCNJ5/MYOF/NMU/IGFBP5/PTGS2/EDNRA/JUP/HTR2B/GJA1/SPX/SORBS2/CXCR4/TTN 25

BP GO:0060191 regulation of lipase activity 9/532 98/18670 0.00192538307551455 0.0303596635675337 0.0254221060542767 PLA2G1B/PNLIP/EDNRA/HTR2B/GNA15/ANXA1/PDGFRB/PLA2R1/NTRK2 9

BP GO:0070371 ERK1 and ERK2 cascade 19/532 317/18670 0.00196093897763026 0.0308086874752596 0.0257981027571954 EGF/CCL20/GATA4/PTGER4/FN1/FAM83D/CCL18/LIF/WNK2/GPNMB/NOX4/HTR2B/PSCA/LMO3/PDGFRB/PKHD1/EPO/CEACAM1/EMILIN1 19

BP GO:0034340 response to type I interferon 9/532 99/18670 0.00206576677181544 0.0322229999675298 0.0269823979023771 IFI27/OAS1/MX2/GBP2/MMP12/RSAD2/IFITM1/ISG15/OAS2 9

BP GO:0048525 negative regulation of viral process 9/532 99/18670 0.00206576677181544 0.0322229999675298 0.0269823979023771 SLPI/TRIM59/OAS1/RSAD2/PROX1/IFITM1/IFI16/TRIM31/ISG15 9

BP GO:0001952 regulation of cell-matrix adhesion 10/532 119/18670 0.00215151645698771 0.0334407129314661 0.0280020675717724 POSTN/PLAU/CEACAM6/FAM107A/THY1/MMP12/ONECUT1/MAP4K4/EFNA5/JUP 10

BP GO:0060840 artery development 9/532 100/18670 0.00221419081836624 0.03429237879548 0.0287152223756656 COMP/COL3A1/EFNB2/LTBP1/PROX1/PRRX1/LOX/PDGFRB/LOXL1 9

BP GO:0001837 epithelial to mesenchymal transition 11/532 140/18670 0.0022534286197978 0.0347756859721827 0.0291199266727208 COL1A1/GREM1/PBLD/HPN/SFRP2/FAM83D/SERPINB3/LEF1/S100A4/SNAI2/TWIST1 11

BP GO:0032633 interleukin-4 production 5/532 33/18670 0.00226137847659185 0.0347756859721827 0.0291199266727208 LEF1/IL1RAP/VTCN1/FCER1G/TNFSF4 5

BP GO:0009069 serine family amino acid metabolic process 6/532 48/18670 0.00231308072925679 0.0354455187807238 0.0296808209217458 CBS/TDH/CTH/GCAT/PHGDH/PSAT1 6

BP GO:0050830 defense response to Gram-positive bacterium 9/532 101/18670 0.00237097763956582 0.0357982287268809 0.0299761677274723 PLA2G1B/CHGA/LYZ/KRT6A/GBP2/SPACA3/REG3G/DMBT1/RNASE6 9

BP GO:0016102 diterpenoid biosynthetic process 3/532 10/18670 0.00237722612639443 0.0357982287268809 0.0299761677274723 RBP1/CRABP2/DHRS9 3

BP GO:0032836 glomerular basement membrane development 3/532 10/18670 0.00237722612639443 0.0357982287268809 0.0299761677274723 SULF1/SULF2/NPHS1 3

BP GO:0038063 collagen-activated tyrosine kinase receptor signaling pathway 3/532 10/18670 0.00237722612639443 0.0357982287268809 0.0299761677274723 COL1A1/COL4A1/COL4A2 3

BP GO:0060033 anatomical structure regression 3/532 10/18670 0.00237722612639443 0.0357982287268809 0.0299761677274723 LEF1/AMHR2/GLI2 3

BP GO:1901342 regulation of vasculature development 23/532 422/18670 0.00240093556112881 0.0360305915932159 0.0301707401547294 SULF1/EFNB2/GATA4/CTH/THBS2/SFRP2/CXCL10/SPARC/ID1/SRPX2/HK2/PTGS2/GPNMB/C6/JUP/ANXA1/PTGIS/TWIST1/CXCR4/CEACAM1/COL4A2/EMILIN1/CYP1B1 23

BP GO:0010811 positive regulation of cell-substrate adhesion 10/532 121/18670 0.00243316747052305 0.0363481600880771 0.0304366607548672 COL8A1/CEACAM6/FN1/THY1/AGR2/MAP4K4/EDIL3/JUP/EMILIN1/ITGA3 10

BP GO:0002548 monocyte chemotaxis 7/532 65/18670 0.00244715324122394 0.0363481600880771 0.0304366607548672 GREM1/CCL20/PLA2G7/CXCL10/CCL18/ANXA1/NBL1 7

BP GO:0006940 regulation of smooth muscle contraction 7/532 65/18670 0.00244715324122394 0.0363481600880771 0.0304366607548672 ITGA2/P2RX1/CHRM3/ABAT/NMU/PTGS2/SPX 7

BP GO:0098869 cellular oxidant detoxification 9/532 102/18670 0.00253645569815934 0.0375464462530253 0.0314400631114487 ALB/NQO1/GSTA1/GPX2/ALOX5AP/PTGS2/RGN/GPX8/DUOX2 9

BP GO:2000146 negative regulation of cell motility 20/532 349/18670 0.00255035932349023 0.0375736743263686 0.0314628629348608 SULF1/C5/COL3A1/GREM1/IGFBP3/PBLD/PTGER4/DPYSL3/SFRP2/THY1/DPEP1/IGFBP5/IFITM1/TIMP1/RGN/JUP/NBL1/KRT16/EMILIN1/CYP1B1 20

BP GO:1904018 positive regulation of vasculature development 15/532 230/18670 0.0025590985219836 0.0375736743263686 0.0314628629348608 EFNB2/GATA4/CTH/SFRP2/SRPX2/HK2/PTGS2/C6/JUP/ANXA1/PTGIS/TWIST1/CXCR4/CEACAM1/CYP1B1 15

BP GO:0048546 digestive tract morphogenesis 6/532 49/18670 0.00257356215213646 0.0375736743263686 0.0314628629348608 GATA4/SFRP5/SFRP2/AGR2/DACT1/GLI2 6

BP GO:0019079 viral genome replication 10/532 122/18670 0.00258468051244191 0.0375736743263686 0.0314628629348608 NR5A2/IFI27/SLPI/OAS1/TOP2A/RSAD2/PROX1/IFITM1/IFI16/ISG15 10

BP GO:0003382 epithelial cell morphogenesis 5/532 34/18670 0.00259009703536549 0.0375736743263686 0.0314628629348608 FRMD6/CLDN3/PALLD/ID1/VSIG1 5

BP GO:0043276 anoikis 5/532 34/18670 0.00259009703536549 0.0375736743263686 0.0314628629348608 PDK4/CEACAM5/CEACAM6/SNAI2/NTRK2 5

BP GO:0006633 fatty acid biosynthetic process 12/532 164/18670 0.00263722794917907 0.0381302858299911 0.0319289496767195 PLA2G1B/ACADL/EPHX2/PDK4/MGLL/ALOX5AP/ACSM3/PTGS2/RGN/ANXA1/PTGIS/CEACAM1 12

BP GO:0055093 response to hyperoxia 4/532 21/18670 0.00265255654282743 0.0382249207761091 0.0320081936258925 BNIP3/COL1A1/PDGFRB/EPO 4

BP GO:0043154 negative regulation of cysteine-type endopeptidase activity involved in apoptotic process 8/532 84/18670 0.00269650800749292 0.0385827910557943 0.0323078615119872 SFN/SFRP2/MMP9/DPEP1/PLAUR/LEF1/PTGS2/BIRC3 8

BP GO:0097756 negative regulation of blood vessel diameter 8/532 84/18670 0.00269650800749292 0.0385827910557943 0.0323078615119872 COMP/P2RX1/CHRM3/CHGA/PTGS2/EDNRA/HTR2B/GJA1 8

BP GO:0034599 cellular response to oxidative stress 18/532 302/18670 0.00270398696507749 0.0385827910557943 0.0323078615119872 BNIP3/LCN2/NQO1/GATA4/GJB2/GPX2/MMP9/DPEP1/ECT2/VNN1/NOX4/RGN/GPX8/ANXA1/MMP2/NCF2/PLA2R1/CYP1B1 18

BP GO:0050680 negative regulation of epithelial cell proliferation 12/532 165/18670 0.00277267085170786 0.0394335410020674 0.0330202493588325 SULF1/EFNB2/PBLD/HPN/SFN/SFRP2/SPARC/CD109/RGN/SNAI2/GJA1/CEACAM1 12

BP GO:0001523 retinoid metabolic process 9/532 104/18670 0.00289482862777903 0.0407717074854539 0.0341407825354686 CLPS/PNLIP/RBP1/GPC6/SDR16C5/CRABP2/DHRS9/CYP2S1/CYP1B1 9

BP GO:0014812 muscle cell migration 9/532 104/18670 0.00289482862777903 0.0407717074854539 0.0341407825354686 POSTN/ITGA2/PLAU/IGFBP3/IGFBP5/PLAT/NOX4/ANXA1/PDGFRB 9

BP GO:0022407 regulation of cell-cell adhesion 22/532 403/18670 0.00289755874783272 0.0407717074854539 0.0341407825354686 FGL1/IGFBP2/ABAT/EFNB2/CEACAM6/ZBTB16/THY1/FXYD5/LEF1/PAK3/GPNMB/LGALS1/VNN1/TNFRSF21/EFNA5/VTCN1/SNAI2/ANXA1/TNFSF4/EPO/CEACAM1/GLI2 22

BP GO:0045682 regulation of epidermis development 8/532 85/18670 0.00290423467842158 0.0407717074854539 0.0341407825354686 SFN/CDH3/CTSK/REG3G/SFRP4/CD109/KRT17/REG3A 8

BP GO:0001933 negative regulation of protein phosphorylation 23/532 429/18670 0.00294742657672251 0.0411781442716946 0.0344811182925229 GPRC5A/GREM1/IGFBP3/PBLD/SFN/DKK1/KIRREL2/SFRP2/THY1/CAMK2N2/CCNB1/LIF/SERPINB3/WNK2/CD109/RGN/DACT1/PSCA/LMO3/TWIST1/PMEPA1/CEACAM1/EMILIN1 23

BP GO:0048333 mesodermal cell differentiation 5/532 35/18670 0.0029521096077134 0.0411781442716946 0.0344811182925229 INHBA/ITGA2/DKK1/SFRP2/ITGA3 5

BP GO:1904951 positive regulation of establishment of protein localization 24/532 456/18670 0.00305986814070755 0.0422204785349657 0.035353932054966 POSTN/PLA2G1B/C5/ABAT/SFN/PTGER4/ANO1/ADAM9/ECT2/MMP12/NMU/PTGS2/IL1RAP/VTCN1/PDZK1/JUP/HTR2B/TNFSF4/SLC30A8/CLEC5A/GJA1/TWIST1/TTN/CFTR 24

BP GO:0035051 cardiocyte differentiation 12/532 167/18670 0.0030605143750181 0.0422204785349657 0.035353932054966 GREM1/EFNB2/GATA4/DKK1/SEMA3C/CCNB1/PROX1/NOX4/TWIST1/PDGFRB/SORBS2/TTN 12

BP GO:0015711 organic anion transport 25/532 482/18670 0.00306721194783973 0.0422204785349657 0.035353932054966 SLC6A14/PLA2G1B/SLC4A4/ABAT/SLC3A1/SLC16A10/SLC38A5/SLC38A3/CA4/SLC16A4/SLC17A4/SLC25A15/SLC43A1/SLC44A4/SLC6A6/ANXA1/SLC2A1/GLS2/GJA1/SPX/SLC7A2/PLA2R1/CEACAM1/NTRK2/CFTR 25

BP GO:0006805 xenobiotic metabolic process 10/532 125/18670 0.00308504415765604 0.0422204785349657 0.035353932054966 EPHX2/NQO1/GSTA1/PHGDH/DPEP1/RORC/EPHX1/GSTA2/CYP2S1/CYP1B1 10

BP GO:0030326 embryonic limb morphogenesis 10/532 125/18670 0.00308504415765604 0.0422204785349657 0.035353932054966 DKK1/ZBTB16/SFRP2/LEF1/PRRX1/GJA1/TWIST1/CRABP2/PITX1/GLI2 10

BP GO:0035113 embryonic appendage morphogenesis 10/532 125/18670 0.00308504415765604 0.0422204785349657 0.035353932054966 DKK1/ZBTB16/SFRP2/LEF1/PRRX1/GJA1/TWIST1/CRABP2/PITX1/GLI2 10

BP GO:0048608 reproductive structure development 23/532 431/18670 0.00312160976244586 0.0424466886102614 0.0355433523531166 SULF1/INHBA/KRT19/GATA4/GJB2/SERPINB5/SFRP2/CRIP1/LIF/LEF1/PTGS2/AMHR2/CTSB/ANXA1/TEX11/SERPINA5/STC2/GJA1/PTGIS/PDGFRB/BIK/SPP1/GLI2 23

BP GO:0019369 arachidonic acid metabolic process 6/532 51/18670 0.00315981000579393 0.0424466886102614 0.0355433523531166 EPHX2/MGLL/PTGS2/PTGIS/CYP2S1/CYP1B1 6

BP GO:0051965 positive regulation of synapse assembly 7/532 68/18670 0.00316797692303624 0.0424466886102614 0.0355433523531166 THBS2/SRPX2/IL1RAP/EFNA5/LRRN1/FLRT2/NTRK2 7

BP GO:0071230 cellular response to amino acid stimulus 7/532 68/18670 0.00316797692303624 0.0424466886102614 0.0355433523531166 COL1A1/COL3A1/COL5A2/COL1A2/COL4A1/MMP2/NTRK2 7

BP GO:0032656 regulation of interleukin-13 production 4/532 22/18670 0.00316984692057329 0.0424466886102614 0.0355433523531166 LEF1/IL1RAP/TNFRSF21/TNFSF4 4

BP GO:0044342 type B pancreatic cell proliferation 4/532 22/18670 0.00316984692057329 0.0424466886102614 0.0355433523531166 REG1A/IGFBP3/IGFBP5/SGPP2 4

BP GO:0097205 renal filtration 4/532 22/18670 0.00316984692057329 0.0424466886102614 0.0355433523531166 SULF1/SULF2/GJA1/ITGA3 4

BP GO:0031652 positive regulation of heat generation 3/532 11/18670 0.00319990686112699 0.0424573007915387 0.0355522386175278 ABAT/NMU/PTGS2 3

BP GO:1900115 extracellular regulation of signal transduction 3/532 11/18670 0.00319990686112699 0.0424573007915387 0.0355522386175278 LTBP1/FBN1/NBL1 3

BP GO:1900116 extracellular negative regulation of signal transduction 3/532 11/18670 0.00319990686112699 0.0424573007915387 0.0355522386175278 LTBP1/FBN1/NBL1 3

BP GO:1901606 alpha-amino acid catabolic process 9/532 106/18670 0.00329205193980839 0.0435471429849426 0.0364648338365594 GPT2/CBS/TDH/GCAT/ADHFE1/MAT1A/KYNU/SARDH/GLS2 9

BP GO:0003417 growth plate cartilage development 5/532 36/18670 0.00334927472036592 0.0438958734416687 0.0367568483589051 COMP/COL6A3/COL12A1/COCH/MATN3 5

BP GO:0071634 regulation of transforming growth factor beta production 5/532 36/18670 0.00334927472036592 0.0438958734416687 0.0367568483589051 CDH3/LUM/LTBP1/PTGS2/ITGB6 5

BP GO:0060537 muscle tissue development 22/532 408/18670 0.00335897941843945 0.0438958734416687 0.0367568483589051 COL11A1/COL3A1/GREM1/EFNB2/GATA4/BTG2/DKK1/SEMA3C/NPHS1/CCNB1/IGFBP5/PROX1/LEF1/LOX/NOX4/KLF5/GJA1/TWIST1/PDGFRB/SORBS2/PITX1/TTN 22

BP GO:0030307 positive regulation of cell growth 12/532 169/18670 0.00337210019722361 0.0438958734416687 0.0367568483589051 REG1A/HPN/SFN/FN1/SFRP2/LEF1/SLC44A4/EFNA5/PRSS2/KRT17/CRABP2/CXCR4 12

BP GO:0015849 organic acid transport 19/532 333/18670 0.00338526026887112 0.0438958734416687 0.0367568483589051 SLC6A14/PLA2G1B/ABAT/SLC3A1/SLC16A10/SLC38A5/SLC38A3/SLC16A4/SLC17A4/SLC25A15/SLC43A1/SLC6A6/ANXA1/GLS2/SPX/SLC7A2/PLA2R1/CEACAM1/NTRK2 19

BP GO:0046942 carboxylic acid transport 19/532 333/18670 0.00338526026887112 0.0438958734416687 0.0367568483589051 SLC6A14/PLA2G1B/ABAT/SLC3A1/SLC16A10/SLC38A5/SLC38A3/SLC16A4/SLC17A4/SLC25A15/SLC43A1/SLC6A6/ANXA1/GLS2/SPX/SLC7A2/PLA2R1/CEACAM1/NTRK2 19

BP GO:0045765 regulation of angiogenesis 21/532 383/18670 0.00339374604949768 0.0438958734416687 0.0367568483589051 SULF1/GATA4/THBS2/SFRP2/CXCL10/SPARC/ID1/SRPX2/HK2/PTGS2/GPNMB/C6/JUP/ANXA1/PTGIS/TWIST1/CXCR4/CEACAM1/COL4A2/EMILIN1/CYP1B1 21

BP GO:0061458 reproductive system development 23/532 434/18670 0.00339910600869539 0.0438958734416687 0.0367568483589051 SULF1/INHBA/KRT19/GATA4/GJB2/SERPINB5/SFRP2/CRIP1/LIF/LEF1/PTGS2/AMHR2/CTSB/ANXA1/TEX11/SERPINA5/STC2/GJA1/PTGIS/PDGFRB/BIK/SPP1/GLI2 23

BP GO:0035107 appendage morphogenesis 11/532 148/18670 0.0034689784579507 0.0445339063392373 0.0372911144897541 DKK1/ZBTB16/SEMA3C/SFRP2/LEF1/PRRX1/GJA1/TWIST1/CRABP2/PITX1/GLI2 11

BP GO:0035108 limb morphogenesis 11/532 148/18670 0.0034689784579507 0.0445339063392373 0.0372911144897541 DKK1/ZBTB16/SEMA3C/SFRP2/LEF1/PRRX1/GJA1/TWIST1/CRABP2/PITX1/GLI2 11

BP GO:0030336 negative regulation of cell migration 19/532 334/18670 0.00349730365566086 0.044765486792459 0.0374850317520059 SULF1/C5/COL3A1/GREM1/IGFBP3/PBLD/PTGER4/DPYSL3/SFRP2/THY1/DPEP1/IGFBP5/IFITM1/TIMP1/JUP/NBL1/KRT16/EMILIN1/CYP1B1 19

BP GO:0048839 inner ear development 13/532 192/18670 0.00350806625131557 0.0447715669376111 0.0374901230500216 COL11A1/MCOLN3/HPN/CTHRC1/GJB2/SPARC/KCNK3/PROX1/PRRX1/SLC44A4/PDGFRB/LRIG1/GLI2 13

BP GO:0060828 regulation of canonical Wnt signaling pathway 17/532 286/18670 0.00360072426899637 0.0455808860522327 0.0381678181871202 EGF/COL1A1/IGFBP2/SULF2/GREM1/CTNND2/SFRP5/CTHRC1/DKK1/CDH3/SFRP2/WNK2/SFRP4/JUP/DACT1/SNAI2/SCEL 17

BP GO:0022404 molting cycle process 8/532 88/18670 0.00360290091956986 0.0455808860522327 0.0381678181871202 INHBA/DKK1/CDH3/IGFBP5/CD109/KRT17/FOXQ1/LRIG1 8

BP GO:0022405 hair cycle process 8/532 88/18670 0.00360290091956986 0.0455808860522327 0.0381678181871202 INHBA/DKK1/CDH3/IGFBP5/CD109/KRT17/FOXQ1/LRIG1 8

BP GO:0002683 negative regulation of immune system process 24/532 463/18670 0.00370576583738731 0.0466496973374184 0.0390628028691327 FGL1/C5/CLDN18/INHBA/COL3A1/GREM1/PTGER4/ZBTB16/THY1/MMP12/FBN1/GPNMB/IFI16/TNFRSF21/VTCN1/ANXA1/FCER1G/TNFSF4/CEACAM1/NBL1/C1QC/MICB/MNDA/EMILIN1 24

BP GO:0043901 negative regulation of multi-organism process 12/532 171/18670 0.00370882244456497 0.0466496973374184 0.0390628028691327 SLPI/TRIM59/OAS1/KRT6A/RSAD2/PROX1/IFITM1/IFI16/TRIM31/TIMP1/ISG15/MICB 12

BP GO:0032331 negative regulation of chondrocyte differentiation 4/532 23/18670 0.00375185553497136 0.0469197565752741 0.0392889409016057 GREM1/ADAMTS12/SNAI2/GLI2 4

BP GO:2000050 regulation of non-canonical Wnt signaling pathway 4/532 23/18670 0.00375185553497136 0.0469197565752741 0.0392889409016057 DKK1/SFRP2/SFRP4/DACT1 4

BP GO:0033280 response to vitamin D 5/532 37/18670 0.00378344893318383 0.0470444850206172 0.0393933840802478 CXCL10/PTGS2/SNAI2/STC2/SPP1 5

BP GO:0071276 cellular response to cadmium ion 5/532 37/18670 0.00378344893318383 0.0470444850206172 0.0393933840802478 MT1G/MT1F/MT1H/MT1M/MMP9 5

BP GO:0032964 collagen biosynthetic process 6/532 53/18670 0.00384026440324466 0.0476149022305434 0.0398710312311681 COL1A1/ITGA2/COL5A1/SERPINH1/PDGFRB/EMILIN1 6

BP GO:0001676 long-chain fatty acid metabolic process 9/532 109/18670 0.00396693969526735 0.0489602877704801 0.0409976093898515 ACADL/EPHX2/GSTA1/MGLL/ACSL5/PTGS2/PTGIS/CYP2S1/CYP1B1 9

BP GO:0042593 glucose homeostasis 15/532 241/18670 0.00397127334167727 0.0489602877704801 0.0409976093898515 PDK4/BRSK2/FAM3B/GATA4/KLF15/ANO1/OAS1/IGFBP5/HK2/LGALS1/NOX4/MAP4K4/EFNA5/BHLHA15/CFTR 15

BP GO:0033500 carbohydrate homeostasis 15/532 242/18670 0.00412624365233514 0.0507095911495225 0.0424624140285524 PDK4/BRSK2/FAM3B/GATA4/KLF15/ANO1/OAS1/IGFBP5/HK2/LGALS1/NOX4/MAP4K4/EFNA5/BHLHA15/CFTR 15

BP GO:0010717 regulation of epithelial to mesenchymal transition 8/532 90/18670 0.00413646710893394 0.0507095911495225 0.0424624140285524 COL1A1/GREM1/PBLD/HPN/SFRP2/SERPINB3/LEF1/TWIST1 8

BP GO:0006563 L-serine metabolic process 3/532 12/18670 0.00417689871449365 0.0507658497639889 0.0425095229979996 CBS/PHGDH/PSAT1 3

BP GO:0031581 hemidesmosome assembly 3/532 12/18670 0.00417689871449365 0.0507658497639889 0.0425095229979996 LAMC2/LAMB3/COL17A1 3

BP GO:0032429 regulation of phospholipase A2 activity 3/532 12/18670 0.00417689871449365 0.0507658497639889 0.0425095229979996 PLA2G1B/ANXA1/PLA2R1 3

BP GO:0043583 ear development 14/532 219/18670 0.00418771600764522 0.0507658497639889 0.0425095229979996 COL11A1/MCOLN3/HPN/CTHRC1/GJB2/SPARC/KCNK3/PROX1/PRRX1/SLC44A4/TWIST1/PDGFRB/LRIG1/GLI2 14

BP GO:0016101 diterpenoid metabolic process 9/532 110/18670 0.0042144414961295 0.0508067850170515 0.0425438007278039 CLPS/PNLIP/RBP1/GPC6/SDR16C5/CRABP2/DHRS9/CYP2S1/CYP1B1 9

BP GO:0033559 unsaturated fatty acid metabolic process 9/532 110/18670 0.0042144414961295 0.0508067850170515 0.0425438007278039 EPHX2/GSTA1/MGLL/ALOX5AP/PTGS2/ANXA1/PTGIS/CYP2S1/CYP1B1 9

BP GO:0042326 negative regulation of phosphorylation 24/532 468/18670 0.00423424303923881 0.0509044909026721 0.0426256161728548 INHBA/GPRC5A/GREM1/IGFBP3/PBLD/SFN/DKK1/KIRREL2/SFRP2/THY1/CAMK2N2/CCNB1/LIF/SERPINB3/WNK2/CD109/RGN/DACT1/PSCA/LMO3/TWIST1/PMEPA1/CEACAM1/EMILIN1 24

BP GO:0071604 transforming growth factor beta production 5/532 38/18670 0.00425648204485016 0.0510308811547876 0.0427314508895788 CDH3/LUM/LTBP1/PTGS2/ITGB6 5

BP GO:0055076 transition metal ion homeostasis 10/532 131/18670 0.00431616582165734 0.0516042682853097 0.0432115849467256 SLC39A5/MT1G/MT1F/SLC30A2/CP/LCN2/MT1H/MT1M/HEPH/SLC30A8 10

BP GO:0060193 positive regulation of lipase activity 7/532 72/18670 0.00436854007765046 0.0520873600491365 0.0436161088646746 PLA2G1B/PNLIP/EDNRA/HTR2B/GNA15/PDGFRB/NTRK2 7

BP GO:0003418 growth plate cartilage chondrocyte differentiation 4/532 24/18670 0.00440221356558865 0.052202815905836 0.0437127875062897 COL6A3/COL12A1/COCH/MATN3 4

BP GO:0060343 trabecula formation 4/532 24/18670 0.00440221356558865 0.052202815905836 0.0437127875062897 COL1A1/GREM1/CHAD/MMP2 4

BP GO:0014909 smooth muscle cell migration 8/532 91/18670 0.00442508325674921 0.0523314193841646 0.0438204755001882 POSTN/ITGA2/PLAU/IGFBP3/IGFBP5/PLAT/NOX4/PDGFRB 8

BP GO:0031668 cellular response to extracellular stimulus 16/532 268/18670 0.00447043419458994 0.0526219595103401 0.0440637635025149 ALB/SLC39A5/POSTN/COL1A1/CBS/PDK4/LCN2/SFRP2/FAM107A/SLC38A3/PTGS2/KIAA1324/IFI16/SNAI2/SLC2A1/BHLHA15 16

BP GO:0031623 receptor internalization 9/532 111/18670 0.00447383387381109 0.0526219595103401 0.0440637635025149 EGF/GREM1/EFNB2/RAB31/DKK1/SFRP4/HTR2B/FCER1G/CEACAM1 9

BP GO:0031099 regeneration 13/532 198/18670 0.00454915788069477 0.0532825009996877 0.0446168775302145 POSTN/REG1A/SULF2/GATA4/THY1/CCNB1/PRRX1/KLF5/MAP4K4/RGN/ANXA1/GJA1/SPP1 13

BP GO:0055007 cardiac muscle cell differentiation 10/532 132/18670 0.00455447848618654 0.0532825009996877 0.0446168775302145 GREM1/EFNB2/GATA4/DKK1/CCNB1/PROX1/NOX4/PDGFRB/SORBS2/TTN 10

BP GO:0042304 regulation of fatty acid biosynthetic process 6/532 55/18670 0.00462362350051477 0.0538021643696264 0.0450520252146978 ACADL/PDK4/PTGS2/RGN/ANXA1/CEACAM1 6

BP GO:0046456 icosanoid biosynthetic process 6/532 55/18670 0.00462362350051477 0.0538021643696264 0.0450520252146978 PLA2G1B/ALOX5AP/GGT6/PTGS2/ANXA1/PTGIS 6

BP GO:0070268 cornification 9/532 112/18670 0.00474549570200272 0.0549265885508399 0.0459935781644272 KRT19/PI3/KRT6A/JUP/KRT17/KRT7/CSTA/KRT16/KRT23 9

BP GO:1990748 cellular detoxification 9/532 112/18670 0.00474549570200272 0.0549265885508399 0.0459935781644272 ALB/NQO1/GSTA1/GPX2/ALOX5AP/PTGS2/RGN/GPX8/DUOX2 9

BP GO:0010975 regulation of neuron projection development 25/532 499/18670 0.00477329019916669 0.0551017478694255 0.0461402503686027 REG1A/BRSK2/NRCAM/EFNB2/FN1/DKK1/DPYSL3/SEMA3C/SFRP2/SPOCK1/THY1/ID1/SERPINI1/PRRX1/PAK3/LGALS1/MAP4K4/EFNA5/CRABP2/CXCR4/EPO/NTRK2/SPP1/CDC20/ITGA3 25

BP GO:0045927 positive regulation of growth 16/532 270/18670 0.00479869265083833 0.0551524384402037 0.0461826968556466 REG1A/HPN/SFN/FN1/SFRP2/AGR2/CCNB1/PROX1/LEF1/SLC44A4/PLS1/EFNA5/PRSS2/KRT17/CRABP2/CXCR4 16

BP GO:0009581 detection of external stimulus 10/532 133/18670 0.00480302715276591 0.0551524384402037 0.0461826968556466 COL11A1/GUCA1C/ITGA2/HPN/ANO1/BACE1/JUP/LXN/CXCR4/TTN 10

BP GO:0040013 negative regulation of locomotion 21/532 396/18670 0.0049647941419374 0.0568599581729252 0.0476125133501033 SULF1/C5/COL3A1/GREM1/IGFBP3/PBLD/PTGER4/DPYSL3/SEMA3C/SFRP2/THY1/DPEP1/IGFBP5/IFITM1/TIMP1/RGN/JUP/NBL1/KRT16/EMILIN1/CYP1B1 21

BP GO:0007589 body fluid secretion 8/532 93/18670 0.00504852826488836 0.0576266961104769 0.04825455251898 CEL/CHRM3/NPR3/AGR2/HK2/GJA1/SYTL2/OAS2 8

BP GO:0032355 response to estradiol 10/532 134/18670 0.00506210853767732 0.0576266961104769 0.04825455251898 POSTN/COL1A1/ITGA2/IGFBP2/NQO1/GJB2/PTGS2/ANXA1/GJA1/PDGFRB 10

BP GO:0009404 toxin metabolic process 4/532 25/18670 0.00512443276533882 0.0576266961104769 0.04825455251898 CBS/CTH/DDC/CYP1B1 4

BP GO:0014829 vascular smooth muscle contraction 4/532 25/18670 0.00512443276533882 0.0576266961104769 0.04825455251898 COMP/P2RX1/CHRM3/EDNRA 4

BP GO:0031639 plasminogen activation 4/532 25/18670 0.00512443276533882 0.0576266961104769 0.04825455251898 PLAU/HPN/F11/PLAT 4

BP GO:0032616 interleukin-13 production 4/532 25/18670 0.00512443276533882 0.0576266961104769 0.04825455251898 LEF1/IL1RAP/TNFRSF21/TNFSF4 4

BP GO:0090025 regulation of monocyte chemotaxis 4/532 25/18670 0.00512443276533882 0.0576266961104769 0.04825455251898 GREM1/PLA2G7/CXCL10/NBL1 4

BP GO:0006790 sulfur compound metabolic process 20/532 372/18670 0.00519853722614589 0.0583093660004817 0.0488261960849622 GNMT/VCAN/CBS/PDK4/TPST2/CHAC1/CTH/GSTA1/GAMT/LUM/MAT1A/KYNU/PHGDH/DPEP1/ACSM3/GGT6/ACSL5/NOX4/GSTA2/BGN 20

BP GO:0007171 activation of transmembrane receptor protein tyrosine kinase activity 3/532 13/18670 0.00531604880408636 0.0586455509060101 0.049107705407461 EGF/GREM1/EFNA5 3

BP GO:0010838 positive regulation of keratinocyte proliferation 3/532 13/18670 0.00531604880408636 0.0586455509060101 0.049107705407461 CDH3/REG3G/REG3A 3

BP GO:0031650 regulation of heat generation 3/532 13/18670 0.00531604880408636 0.0586455509060101 0.049107705407461 ABAT/NMU/PTGS2 3

BP GO:0043568 positive regulation of insulin-like growth factor receptor signaling pathway 3/532 13/18670 0.00531604880408636 0.0586455509060101 0.049107705407461 IGFBP3/CDH3/IGFBP5 3

BP GO:0050966 detection of mechanical stimulus involved in sensory perception of pain 3/532 13/18670 0.00531604880408636 0.0586455509060101 0.049107705407461 ITGA2/BACE1/CXCR4 3

BP GO:0061478 response to platelet aggregation inhibitor 3/532 13/18670 0.00531604880408636 0.0586455509060101 0.049107705407461 REG1A/EFNA5/CFTR 3

BP GO:0001889 liver development 10/532 135/18670 0.00533202236464514 0.0586455509060101 0.049107705407461 FGL1/ITGA2/REG1A/SULF2/HPN/PROX1/ONECUT1/RGN/ANXA1/CEACAM1 10

BP GO:0030177 positive regulation of Wnt signaling pathway 12/532 179/18670 0.00533631391516084 0.0586455509060101 0.049107705407461 SULF1/EGF/COL1A1/SULF2/DKK1/CDH3/SFRP2/WNK2/SFRP4/JUP/DACT1/SCEL 12

CC GO:0062023 collagen-containing extracellular matrix 65/554 406/19717 1.24143233217284e-30 5.2016014718042e-28 4.46915639582222e-28 POSTN/SULF1/COL10A1/VCAN/COL11A1/COL8A1/LAMC2/COL1A1/AZGP1/COMP/COL3A1/COL5A2/GREM1/LAMB3/SLPI/COL1A2/MFAP5/AEBP1/CTHRC1/THBS2/TGFBI/FN1/SFRP2/LUM/SPARC/MMP9/COL17A1/LTBP1/COL5A1/COL6A3/MXRA5/MFAP2/CTSS/SRPX2/PRSS1/SPON1/GPC6/LGALS4/COL12A1/LGALS3BP/COCH/MATN3/FBN1/MUC17/LGALS1/TGM2/S100A4/CTSB/COL4A1/EFNA5/TIMP1/EDIL3/S100A6/ANXA1/ADAMTS2/SERPINA5/ASPN/BGN/MMP2/SERPINH1/LOXL1/HMCN1/C1QC/COL4A2/EMILIN1 65

CC GO:0044420 extracellular matrix component 18/554 51/19717 1.07076112036912e-15 2.24324454717331e-13 1.92737001666442e-13 COL11A1/COL8A1/LAMC2/COL1A1/COL3A1/COL5A2/LAMB3/COL1A2/MFAP5/LUM/LTBP1/COL5A1/MFAP2/COL12A1/FBN1/COL4A1/COL4A2/EMILIN1 18

CC GO:0005788 endoplasmic reticulum lumen 37/554 309/19717 1.05426316945529e-13 1.47245422667256e-11 1.26511580334635e-11 ALB/ERP27/COL10A1/VCAN/PDIA2/COL11A1/COL8A1/COL1A1/COL3A1/CP/COL5A2/COL1A2/IGFBP3/FN1/MSLN/BACE1/COL17A1/LTBP1/COL5A1/COL6A3/PLAUR/IGFBP5/SPON1/FSTL1/COL12A1/PTGS2/MATN3/FBN1/LGALS1/COL4A1/TIMP1/GPX8/F5/STC2/SERPINH1/SPP1/COL4A2 37

CC GO:0098644 complex of collagen trimers 10/554 19/19717 2.08208582100621e-11 2.18098489750401e-09 1.87387723890559e-09 COL11A1/COL8A1/COL1A1/COL3A1/COL5A2/COL1A2/LUM/COL5A1/COL4A1/COL4A2 10

CC GO:0005581 collagen trimer 18/554 87/19717 2.88788810002751e-11 2.42005022782306e-09 2.07927943201981e-09 COL10A1/COL11A1/COL8A1/COL1A1/COL3A1/COL5A2/COL1A2/CTHRC1/LUM/COL17A1/COL5A1/COL6A3/COL12A1/LOX/COL4A1/C1QC/COL4A2/EMILIN1 18

CC GO:0005583 fibrillar collagen trimer 7/554 11/19717 3.98519415594364e-09 2.38542335905769e-07 2.04952842305673e-07 COL11A1/COL1A1/COL3A1/COL5A2/COL1A2/LUM/COL5A1 7

CC GO:0098643 banded collagen fibril 7/554 11/19717 3.98519415594364e-09 2.38542335905769e-07 2.04952842305673e-07 COL11A1/COL1A1/COL3A1/COL5A2/COL1A2/LUM/COL5A1 7

CC GO:0005604 basement membrane 16/554 95/19717 8.64331610751899e-09 4.52693681131307e-07 3.88949224838354e-07 COL8A1/LAMC2/LAMB3/THBS2/TGFBI/FN1/SPARC/COL17A1/COL5A1/FBN1/COL4A1/EFNA5/TIMP1/LOXL1/HMCN1/COL4A2 16

CC GO:0045177 apical part of cell 33/554 384/19717 1.38869804732495e-08 6.46516090921283e-07 5.55479218929981e-07 AQP8/FAP/HOMER2/CEACAM5/IGFBP2/CEACAM6/HPN/FN1/MAL2/ANO1/CA4/THY1/DPEP1/SLC17A4/OSMR/KCNK1/EPB41L4B/PLAT/SLC44A4/MUC17/NOX4/UMOD/PDZK1/DUOX2/ANXA1/SLC2A1/GJA1/MUC13/PDGFRB/SORBS2/PKHD1/CEACAM1/CFTR 33

CC GO:0016324 apical plasma membrane 28/554 318/19717 1.05971333568939e-07 4.44019887653853e-06 3.81496800848179e-06 CEACAM5/IGFBP2/CEACAM6/HPN/FN1/MAL2/ANO1/CA4/THY1/DPEP1/SLC17A4/OSMR/KCNK1/SLC44A4/MUC17/NOX4/UMOD/PDZK1/DUOX2/ANXA1/SLC2A1/GJA1/MUC13/PDGFRB/SORBS2/PKHD1/CEACAM1/CFTR 28

CC GO:0031225 anchored component of membrane 18/554 170/19717 1.49878337798347e-06 5.70900213977341e-05 4.90510923703682e-05 GP2/CEACAM5/RAB26/CEACAM6/MSLN/CA4/THY1/DPEP1/PLAUR/NT5E/GPC6/LY6E/VNN1/EFNA5/UMOD/CD109/PSCA/PKHD1 18

CC GO:0030667 secretory granule membrane 23/554 298/19717 1.30973625366165e-05 0.000457316241903525 0.000392920876098494 CUZD1/SYCN/PLAU/P2RX1/ANPEP/RAB26/CEACAM6/RAB31/SPARC/OLR1/CA4/PLAUR/SPACA3/PCDH7/VNN1/DMBT1/CD109/SERPINA5/FCER1G/SLC30A8/CLEC5A/MOXD1/CEACAM1 23

CC GO:0009897 external side of plasma membrane 27/554 393/19717 1.97984563273116e-05 0.000638119477011044 0.00054826494444863 AZGP1/ITGA2/P2RX1/ANPEP/CEACAM5/NRCAM/CXCL10/KCNJ5/ADAM9/CA4/THY1/ANTXR2/OSMR/MUC17/DMBT1/IL2RG/ITGB6/EFNA5/VTCN1/ANTXR1/ANXA1/SERPINA5/FCER1G/PKHD1/CXCR4/MICB/ITGA3 27

CC GO:0031233 intrinsic component of external side of plasma membrane 6/554 24/19717 4.18610646395868e-05 0.00125284186314192 0.00107642737644652 CEACAM5/ADAM9/CA4/THY1/EFNA5/PKHD1 6

CC GO:0031091 platelet alpha granule 11/554 91/19717 4.84012443332229e-05 0.00135200809170803 0.00116162986399735 ALB/EGF/THBS2/FN1/SPARC/PCDH7/CD109/TIMP1/F5/SERPINA5/ISLR 11

CC GO:0001527 microfibril 4/554 10/19717 0.000113143460588038 0.00282806840314239 0.00242984397406029 MFAP5/LTBP1/MFAP2/FBN1 4

CC GO:0030055 cell-substrate junction 26/554 412/19717 0.000114742632108403 0.00282806840314239 0.00242984397406029 FAP/ITGA2/PLAU/EFNB2/FAM107A/ADAM9/COL17A1/THY1/PALLD/PLAUR/CAP1/NPHS1/NOX4/TGM2/MAP4K4/ITGB6/JUP/ANXA1/ITGA11/GJA1/PDGFRB/SORBS2/FLRT2/FHL2/ITGBL1/ITGA3 26

CC GO:0016323 basolateral plasma membrane 17/554 217/19717 0.000144005389797745 0.00335212546251418 0.00288010779595491 SLC39A5/SLC4A4/CEACAM5/CHRM3/SLC41A1/SLC16A10/KCNJ16/SLC38A3/ADAM9/HEPH/SLC8A2/UMOD/ANXA1/SLC2A1/CEACAM1/VSIG1/ITGA3 17

CC GO:0008305 integrin complex 6/554 31/19717 0.000193759179553966 0.00427289980174273 0.00367122655996989 ITGA2/ITGB6/ITGA11/ITGBL1/EMILIN1/ITGA3 6

CC GO:0005925 focal adhesion 25/554 405/19717 0.000216841417365279 0.00454282769380258 0.00390314551257501 FAP/ITGA2/PLAU/EFNB2/FAM107A/ADAM9/THY1/PALLD/PLAUR/CAP1/NPHS1/NOX4/TGM2/MAP4K4/ITGB6/JUP/ANXA1/ITGA11/GJA1/PDGFRB/SORBS2/FLRT2/FHL2/ITGBL1/ITGA3 25

CC GO:0005924 cell-substrate adherens junction 25/554 408/19717 0.000242553383202175 0.00467665951266133 0.00401813227818157 FAP/ITGA2/PLAU/EFNB2/FAM107A/ADAM9/THY1/PALLD/PLAUR/CAP1/NPHS1/NOX4/TGM2/MAP4K4/ITGB6/JUP/ANXA1/ITGA11/GJA1/PDGFRB/SORBS2/FLRT2/FHL2/ITGBL1/ITGA3 25

CC GO:0060205 cytoplasmic vesicle lumen 22/554 338/19717 0.000246365773505218 0.00467665951266133 0.00401813227818157 ALB/EGF/LCN2/S100P/PLAC8/SLPI/LYZ/FN1/BACE1/SPARC/TCN1/CAP1/SERPINI1/SERPINB3/LGALS3BP/TIMP1/JUP/PRSS2/F5/ISLR/CDA/MNDA 22

CC GO:0031983 vesicle lumen 22/554 339/19717 0.0002567140066616 0.00467665951266133 0.00401813227818157 ALB/EGF/LCN2/S100P/PLAC8/SLPI/LYZ/FN1/BACE1/SPARC/TCN1/CAP1/SERPINI1/SERPINB3/LGALS3BP/TIMP1/JUP/PRSS2/F5/ISLR/CDA/MNDA 22

CC GO:0034774 secretory granule lumen 21/554 321/19717 0.000316094033004226 0.00551847499286544 0.00474141049506339 ALB/EGF/LCN2/S100P/PLAC8/SLPI/LYZ/FN1/SPARC/TCN1/CAP1/SERPINI1/SERPINB3/LGALS3BP/TIMP1/JUP/PRSS2/F5/ISLR/CDA/MNDA 21

CC GO:0098636 protein complex involved in cell adhesion 6/554 34/19717 0.000329530798780998 0.00552293618756953 0.00474524350244638 ITGA2/ITGB6/ITGA11/ITGBL1/EMILIN1/ITGA3 6

CC GO:0005775 vacuolar lumen 14/554 172/19717 0.0003692300363483 0.0059502840473053 0.00511241588789954 VCAN/PLAC8/LYZ/LUM/CTSK/CAP1/CTSS/SERPINB3/GPC6/CTSB/PRSS2/BGN/PDGFRB/MNDA 14

CC GO:0005796 Golgi lumen 10/554 102/19717 0.000594652160625206 0.00922812056673931 0.00792869547500274 VCAN/LUM/GPC6/MMP11/MUC17/MUC16/UMOD/BGN/MUC13/HS3ST1 10

CC GO:0031253 cell projection membrane 21/554 345/19717 0.000809528072121284 0.0121140093649578 0.0104082180701308 FAP/GUCA1C/REG1A/S100P/SLC3A1/FAM107A/CA4/THY1/DPEP1/PLAUR/KCNK1/TTYH1/UMOD/PLEK2/PDZK1/LAMP5/ANTXR1/EPS8L3/CEACAM1/KSR1/ITGA3 21

CC GO:1904724 tertiary granule lumen 7/554 55/19717 0.000839680873478453 0.0121319408961197 0.0104236246362842 PRSS3/LYZ/MMP9/TCN1/CTSS/TNFAIP6/CDA 7

CC GO:0031362 anchored component of external side of plasma membrane 4/554 19/19717 0.00170763691211766 0.0238499955392433 0.0204916429454119 CA4/THY1/EFNA5/PKHD1 4

CC GO:0070820 tertiary granule 12/554 164/19717 0.00235792716321665 0.0318700477867025 0.0273823799599353 PRSS3/PLAU/LYZ/OLR1/MMP9/TCN1/CTSS/TNFAIP6/FCER1G/CLEC5A/CEACAM1/CDA 12

CC GO:0031093 platelet alpha granule lumen 7/554 67/19717 0.00269637842692086 0.035305705027495 0.0303342573028597 ALB/EGF/FN1/SPARC/TIMP1/F5/ISLR 7

CC GO:0005793 endoplasmic reticulum-Golgi intermediate compartment 10/554 126/19717 0.00296329377154195 0.0376248512204872 0.032326841144094 TMED6/ANPEP/GJB2/FN1/NUCB2/CA4/TAP1/F5/LAMP5/SERPINH1 10

CC GO:0031528 microvillus membrane 4/554 23/19717 0.00356949275626204 0.0439887489668763 0.037794629183951 S100P/DPEP1/PDZK1/CEACAM1 4

CC GO:0030018 Z disc 10/554 132/19717 0.00413799003176317 0.0495376520945363 0.0425621831838498 KRT19/AHNAK2/FBXO32/PALLD/JUP/SLC2A1/SORBS2/FHL2/TTN/IGFN1 10

MF GO:0005201 extracellular matrix structural constituent 39/525 163/17697 1.42585153762801e-24 9.58172233286022e-22 8.07482239204072e-22 POSTN/COL10A1/VCAN/COL11A1/COL8A1/LAMC2/COL1A1/COMP/COL3A1/COL5A2/LAMB3/COL1A2/MFAP5/AEBP1/CTHRC1/THBS2/TGFBI/FN1/LUM/SPARC/COL17A1/LTBP1/COL5A1/COL6A3/MXRA5/MFAP2/SRPX2/SPON1/COL12A1/MATN3/FBN1/MUC17/COL4A1/EDIL3/ASPN/BGN/HMCN1/COL4A2/EMILIN1 39

MF GO:0005518 collagen binding 20/525 67/17697 3.09714307944884e-15 1.04064007469481e-12 8.76980514075513e-13 COMP/ITGA2/AEBP1/TGFBI/FN1/LUM/SPARC/SPOCK1/ADAM9/MMP9/CTSK/CTSS/MMP12/COCH/CTSB/ANTXR1/ASPN/SERPINH1/ITGA11/ITGA3 20

MF GO:0030020 extracellular matrix structural constituent conferring tensile strength 13/525 41/17697 9.80121690624694e-11 2.19547258699932e-08 1.85019463002135e-08 COL10A1/COL11A1/COL8A1/COL1A1/COL3A1/COL5A2/COL1A2/COL17A1/COL5A1/COL6A3/COL12A1/COL4A1/COL4A2 13

MF GO:0008236 serine-type peptidase activity 24/525 182/17697 9.44982942508608e-10 1.43819405144653e-07 1.21201190425789e-07 CTRL/CELA2B/KLK1/CTRC/PRSS3/FAP/PLAU/CELA3B/TMPRSS4/MMP1/HPN/CTRB2/F11/MMP9/SEC11C/PRSS1/MMP7/PLAT/C1S/DPP10/PRSS2/MMP2/KLK7/CELA3A 24

MF GO:0005539 glycosaminoglycan binding 27/525 229/17697 1.07008485970724e-09 1.43819405144653e-07 1.21201190425789e-07 POSTN/SULF1/VCAN/COL11A1/CEL/LAMC2/COMP/REG1A/SULF2/THBS2/FN1/DPYSL3/CXCL10/F11/REG1B/COL5A1/MMP7/REG3G/FSTL1/FBN1/GPNMB/TNFAIP6/LXN/SERPINA5/BGN/EPYC/REG3A 27

MF GO:0017171 serine hydrolase activity 24/525 186/17697 1.47769709646957e-09 1.65502074804591e-07 1.39473866298356e-07 CTRL/CELA2B/KLK1/CTRC/PRSS3/FAP/PLAU/CELA3B/TMPRSS4/MMP1/HPN/CTRB2/F11/MMP9/SEC11C/PRSS1/MMP7/PLAT/C1S/DPP10/PRSS2/MMP2/KLK7/CELA3A 24

MF GO:0005178 integrin binding 20/525 132/17697 2.07550413735758e-09 1.79963634356048e-07 1.51661082837647e-07 FAP/COMP/ITGA2/COL3A1/TGFBI/FN1/SFRP2/ADAM9/TSPAN8/COL5A1/THY1/FBN1/GPNMB/ITGB6/EDIL3/ISG15/SPP1/ITGBL1/EMILIN1/ITGA3 20

MF GO:0004252 serine-type endopeptidase activity 22/525 160/17697 2.14242421852438e-09 1.79963634356048e-07 1.51661082837647e-07 CTRL/CELA2B/KLK1/CTRC/PRSS3/FAP/PLAU/CELA3B/TMPRSS4/MMP1/HPN/CTRB2/F11/MMP9/PRSS1/MMP7/PLAT/C1S/PRSS2/MMP2/KLK7/CELA3A 22

MF GO:0061135 endopeptidase regulator activity 23/525 182/17697 4.88892357470518e-09 3.6503962691132e-07 3.07630512653964e-07 SERPINI2/CST1/C5/CST2/SLPI/SERPINB5/SFRP2/PI3/SPOCK1/COL6A3/DPEP1/RARRES1/SERPINI1/SERPINB3/LEF1/BIRC3/CD109/TIMP1/LXN/SERPINA5/SERPINH1/CSTA/SERPINB2 23

MF GO:0004866 endopeptidase inhibitor activity 22/525 175/17697 1.16523081437568e-08 7.83035107260456e-07 6.59888608562226e-07 SERPINI2/CST1/C5/CST2/SLPI/SERPINB5/PI3/SPOCK1/COL6A3/DPEP1/RARRES1/SERPINI1/SERPINB3/LEF1/BIRC3/CD109/TIMP1/LXN/SERPINA5/SERPINH1/CSTA/SERPINB2 22

MF GO:0030414 peptidase inhibitor activity 22/525 182/17697 2.40646197158321e-08 1.4701294953672e-06 1.2389249193414e-06 SERPINI2/CST1/C5/CST2/SLPI/SERPINB5/PI3/SPOCK1/COL6A3/DPEP1/RARRES1/SERPINI1/SERPINB3/LEF1/BIRC3/CD109/TIMP1/LXN/SERPINA5/SERPINH1/CSTA/SERPINB2 22

MF GO:0061134 peptidase regulator activity 24/525 219/17697 3.81920181392334e-08 2.13875301579707e-06 1.80239524200944e-06 SERPINI2/CST1/C5/CST2/SLPI/SERPINB5/FN1/SFRP2/PI3/SPOCK1/COL6A3/DPEP1/RARRES1/SERPINI1/SERPINB3/LEF1/BIRC3/CD109/TIMP1/LXN/SERPINA5/SERPINH1/CSTA/SERPINB2 24

MF GO:0004175 endopeptidase activity 34/525 427/17697 1.89559329456358e-07 9.79875918420558e-06 8.25772625485997e-06 CTRL/CELA2B/KLK1/CTRC/CTSE/PRSS3/FAP/PLAU/CELA3B/TMPRSS4/MMP1/HPN/CTRB2/BACE1/F11/ADAM9/MMP9/CTSK/CTSS/PRSS1/MMP12/ADAMTS12/MMP7/PLAT/ADAM28/MMP11/C1S/CTSB/PRSS2/ADAMTS2/MMP2/KLK7/MMP10/CELA3A 34

MF GO:0048407 platelet-derived growth factor binding 6/525 11/17697 2.69692602495796e-07 1.29452449197982e-05 1.09093699355442e-05 COL1A1/COL3A1/COL1A2/COL5A1/COL4A1/PDGFRB 6

MF GO:0008237 metallopeptidase activity 20/525 181/17697 4.56272535995819e-07 2.04410096126127e-05 1.72262894291755e-05 TRHDE/CPA2/FAP/CPA1/ANPEP/MMP1/AEBP1/ADAM9/MMP9/DPEP1/CPB1/MMP12/ADAMTS12/MMP7/ADAM28/MMP11/ADAMTS2/MMP2/MMP10/CPA4 20

MF GO:0019838 growth factor binding 17/525 137/17697 6.48155784857707e-07 2.72225429640237e-05 2.29413034377267e-05 COL1A1/COL3A1/IGFBP2/KLB/COL1A2/IGFBP3/LTBP1/COL5A1/SRPX2/OSMR/IGFBP5/AMHR2/COL4A1/IL2RG/CD109/PDGFRB/NTRK2 17

MF GO:0050840 extracellular matrix binding 11/525 57/17697 7.56554338280196e-07 2.99061479602525e-05 2.52028627860524e-05 COL11A1/ITGA2/TGFBI/SPARC/SPOCK1/ADAM9/CTSS/LGALS1/BGN/SPP1/ITGA3 11

MF GO:0050839 cell adhesion molecule binding 35/525 499/17697 2.42485974980449e-06 9.05280973260344e-05 7.62909090874162e-05 POSTN/FAP/CDH11/COMP/ITGA2/COL3A1/S100P/GPRC5A/CTNND2/SFN/TGFBI/FN1/CDH3/STXBP6/SFRP2/CAPG/ADAM9/TSPAN8/COL5A1/THY1/FXYD5/ANLN/FBN1/GPNMB/ITGB6/EDIL3/JUP/ANXA1/TRIM29/ISG15/HMCN1/SPP1/ITGBL1/EMILIN1/ITGA3 35

MF GO:0048018 receptor ligand activity 33/525 482/17697 7.84151448347489e-06 0.000277341985941849 0.000233724919230443 NRG4/IAPP/EGF/GPHA2/TFF1/C5/INHBA/REG1A/FAM3B/GREM1/CCL20/DKK1/SEMA3C/SFRP2/CXCL10/CCL18/LIF/FBN1/GPNMB/MIA/EFNA5/SST/TNFRSF11B/CXCL5/TIMP1/NRTN/STC2/TNFSF4/SPX/EPO/FLRT2/NBL1/SPP1 33

MF GO:0043394 proteoglycan binding 8/525 36/17697 8.27113175771949e-06 0.000277910027059375 0.000234203625560689 COMP/ITGA2/FN1/COL5A1/CTSK/CTSS/GPNMB/CTSB 8

MF GO:1901681 sulfur compound binding 21/525 250/17697 1.90893753994067e-05 0.000610860012781014 0.000514791176184501 GNMT/POSTN/COL11A1/ACADL/CEL/LAMC2/COMP/ITGA2/CBS/THBS2/FN1/DPYSL3/CXCL10/F11/COL5A1/MMP7/FSTL1/FBN1/GPNMB/LXN/SERPINA5 21

MF GO:0004867 serine-type endopeptidase inhibitor activity 12/525 94/17697 2.144340390059e-05 0.000654998519145295 0.000551988100407532 SERPINI2/SLPI/SERPINB5/PI3/SPOCK1/COL6A3/SERPINI1/SERPINB3/CD109/SERPINA5/SERPINH1/SERPINB2 12

MF GO:0008238 exopeptidase activity 13/525 113/17697 3.0427907363288e-05 0.000889024076005632 0.000749208886107503 TRHDE/CPA2/FAP/CPA1/ANPEP/AEBP1/HPN/BACE1/F11/DPEP1/CPB1/GGT6/CPA4 13

MF GO:0008201 heparin binding 16/525 169/17697 4.46112331977692e-05 0.00124911452953754 0.00105266857282456 POSTN/COL11A1/CEL/LAMC2/COMP/THBS2/FN1/CXCL10/F11/COL5A1/MMP7/FSTL1/FBN1/GPNMB/LXN/SERPINA5 16

MF GO:0070492 oligosaccharide binding 5/525 15/17697 5.28980185831188e-05 0.00138733750345667 0.00116915347252458 REG1A/REG1B/REG3G/LGALS1/REG3A 5

MF GO:0004222 metalloendopeptidase activity 12/525 103/17697 5.39434704132663e-05 0.00138733750345667 0.00116915347252458 FAP/MMP1/ADAM9/MMP9/MMP12/ADAMTS12/MMP7/ADAM28/MMP11/ADAMTS2/MMP2/MMP10 12

MF GO:0098631 cell adhesion mediator activity 9/525 59/17697 5.57412389781699e-05 0.00138733750345667 0.00116915347252458 ITGA2/NRCAM/STXBP6/PALLD/JUP/ANXA1/ITGA11/TRIM29/EMILIN1 9

MF GO:0002020 protease binding 13/525 128/17697 0.000112078083106535 0.00267099141100842 0.00225092947857539 FAP/COL1A1/COMP/COL3A1/LCN2/COL1A2/FN1/SERPINB3/TIMP1/SERPINA5/CSTA/TTN/ITGA3 13

MF GO:0001968 fibronectin binding 6/525 27/17697 0.000115265998391732 0.00267099141100842 0.00225092947857539 IGFBP3/SFRP2/CTSK/CTSS/IGFBP5/ITGA3 6

MF GO:0004857 enzyme inhibitor activity 25/525 375/17697 0.000149428279783453 0.00334719346714936 0.0028207864745087 SERPINI2/CST1/C5/CST2/SLPI/SERPINB5/SFN/PI3/SPOCK1/COL6A3/DPEP1/CAMK2N2/RARRES1/SERPINI1/SERPINB3/LEF1/BIRC3/CD109/TIMP1/LXN/ANXA1/SERPINA5/SERPINH1/CSTA/SERPINB2 25

MF GO:0030170 pyridoxal phosphate binding 8/525 54/17697 0.000178038153738713 0.00373880122851297 0.00315080679971801 ALB/GPT2/CBS/ABAT/CTH/DDC/GCAT/KYNU 8

MF GO:0070279 vitamin B6 binding 8/525 54/17697 0.000178038153738713 0.00373880122851297 0.00315080679971801 ALB/GPT2/CBS/ABAT/CTH/DDC/GCAT/KYNU 8

MF GO:0019842 vitamin binding 13/525 138/17697 0.000238838896467274 0.00486362843715175 0.00409873449120871 ALB/GNMT/GPT2/CBS/ABAT/CTH/DDC/GCAT/RBP1/KYNU/TCN1/EGLN3/CRABP2 13

MF GO:0004869 cysteine-type endopeptidase inhibitor activity 8/525 58/17697 0.000295691040749073 0.00584424645245227 0.00492513250535608 CST1/CST2/SPOCK1/DPEP1/SERPINB3/LEF1/BIRC3/CSTA 8

MF GO:0015171 amino acid transmembrane transporter activity 9/525 74/17697 0.000330899915714375 0.006353278381716 0.00535410991441605 SLC6A14/SLC3A1/SLC16A10/SLC38A5/SLC38A3/SLC25A15/SLC43A1/SLC6A6/SLC7A2 9

MF GO:0008235 metalloexopeptidase activity 8/525 62/17697 0.000470288304760059 0.00877871502218777 0.00739810257195649 TRHDE/CPA2/CPA1/ANPEP/AEBP1/DPEP1/CPB1/CPA4 8

MF GO:0016769 transferase activity, transferring nitrogenous groups 5/525 23/17697 0.000486985127751977 0.00884470286079266 0.00745371262391362 GPT2/GATM/ABAT/BCAT1/PSAT1 5

MF GO:0008514 organic anion transmembrane transporter activity 16/525 211/17697 0.000578580700808028 0.0102317429195525 0.00862261543032463 SLC6A14/SLC4A4/SLC3A1/SLC16A10/SLC38A5/SLC38A3/SLC16A4/SLC17A4/SLC25A15/SLC43A1/SLC44A4/SLC6A6/SLC2A1/SLC7A2/CEACAM1/CFTR 16

MF GO:0017147 Wnt-protein binding 6/525 37/17697 0.000704152490688579 0.0121330890703263 0.0102249403506196 EGF/SFRP5/CTHRC1/SFRP2/SFRP4/MST1R 6

MF GO:0008509 anion transmembrane transporter activity 21/525 327/17697 0.000802819952188122 0.0134873751967604 0.011366240375716 GABRP/SLC6A14/SLC4A4/SLC3A1/SLC16A10/SLC38A5/ANO1/SLC38A3/SLC16A4/SLC17A4/SLC25A15/SLC43A1/FXYD3/SLC44A4/TTYH1/SLC6A6/SLC2A1/SLC7A2/CEACAM1/CFTR/CLIC3 21

MF GO:0008191 metalloendopeptidase inhibitor activity 4/525 16/17697 0.00104886354541777 0.0171911293297742 0.0144875118725228 SPOCK1/RARRES1/TIMP1/LXN 4

MF GO:0042834 peptidoglycan binding 4/525 17/17697 0.00133966298944257 0.0214346078310812 0.0180636262736868 REG1A/REG1B/REG3G/REG3A 4

MF GO:0004181 metallocarboxypeptidase activity 5/525 29/17697 0.00148431294381138 0.0226695067782102 0.0191043149227398 CPA2/CPA1/AEBP1/CPB1/CPA4 5

MF GO:0043236 laminin binding 5/525 29/17697 0.00148431294381138 0.0226695067782102 0.0191043149227398 ITGA2/ADAM9/CTSS/LGALS1/ITGA3 5

MF GO:0005507 copper ion binding 7/525 59/17697 0.00174485414441126 0.0260564885565414 0.0219586322735265 ALB/CP/HEPH/LOX/F5/LOXL1/MOXD1 7

MF GO:0005342 organic acid transmembrane transporter activity 12/525 153/17697 0.00205303832219301 0.029354079840717 0.0247376174096268 SLC6A14/SLC3A1/SLC16A10/SLC38A5/SLC38A3/SLC16A4/SLC17A4/SLC25A15/SLC43A1/SLC6A6/SLC7A2/CEACAM1 12

MF GO:0046943 carboxylic acid transmembrane transporter activity 12/525 153/17697 0.00205303832219301 0.029354079840717 0.0247376174096268 SLC6A14/SLC3A1/SLC16A10/SLC38A5/SLC38A3/SLC16A4/SLC17A4/SLC25A15/SLC43A1/SLC6A6/SLC7A2/CEACAM1 12

MF GO:0032395 MHC class II receptor activity 3/525 10/17697 0.00266583175597281 0.0373216445836193 0.0314521378226616 HLA-DQA1/KRT17/HLA-DRA 3

MF GO:0004602 glutathione peroxidase activity 4/525 21/17697 0.00306672349920192 0.0404085919894841 0.0340536066578046 GSTA1/GPX2/ALOX5AP/GPX8 4

MF GO:0004806 triglyceride lipase activity 4/525 21/17697 0.00306672349920192 0.0404085919894841 0.0340536066578046 PNLIPRP1/PNLIPRP2/CEL/PNLIP 4

MF GO:0008483 transaminase activity 4/525 21/17697 0.00306672349920192 0.0404085919894841 0.0340536066578046 GPT2/ABAT/BCAT1/PSAT1 4

MF GO:0098632 cell-cell adhesion mediator activity 6/525 50/17697 0.00347976943031366 0.0438053477445599 0.0369161608498954 NRCAM/STXBP6/PALLD/JUP/ANXA1/TRIM29 6

MF GO:0030546 receptor activator activity 3/525 11/17697 0.0035852591159982 0.0438053477445599 0.0369161608498954 EGF/GREM1/EFNA5 3

MF GO:0036122 BMP binding 3/525 11/17697 0.0035852591159982 0.0438053477445599 0.0369161608498954 COMP/GREM1/NBL1 3

MF GO:0097493 structural molecule activity conferring elasticity 3/525 11/17697 0.0035852591159982 0.0438053477445599 0.0369161608498954 FBN1/TTN/EMILIN1 3

MF GO:0030021 extracellular matrix structural constituent conferring compression resistance 4/525 22/17697 0.00366142398589039 0.0439370878306847 0.0370271824137036 VCAN/LUM/ASPN/BGN 4

MF GO:0016209 antioxidant activity 8/525 86/17697 0.00397964858703044 0.0469179622892009 0.0395392601998592 ALB/NQO1/GSTA1/GPX2/ALOX5AP/PTGS2/GPX8/DUOX2 8

MF GO:0004601 peroxidase activity 6/525 52/17697 0.00424210816164139 0.0491499428383278 0.0414202212515983 GSTA1/GPX2/ALOX5AP/PTGS2/GPX8/DUOX2 6

MF GO:0015174 basic amino acid transmembrane transporter activity 3/525 12/17697 0.00467583649221689 0.0515108544716353 0.0434098366317979 SLC3A1/SLC38A3/SLC7A2 3

MF GO:0016175 superoxide-generating NADPH oxidase activity 3/525 12/17697 0.00467583649221689 0.0515108544716353 0.0434098366317979 NOX4/DUOX2/NCF2 3

MF GO:0031994 insulin-like growth factor I binding 3/525 12/17697 0.00467583649221689 0.0515108544716353 0.0434098366317979 IGFBP2/IGFBP3/IGFBP5 3

MF GO:0015081 sodium ion transmembrane transporter activity 11/525 149/17697 0.00491812521765881 0.0533061313913987 0.044922773634982 SLC6A14/SLC4A4/SLC41A1/ATP4A/SLC17A4/SLC8A2/KCNK1/SLC24A3/SLC6A6/SLC6A16/FXYD2 11

MF GO:0072509 divalent inorganic cation transmembrane transporter activity 4/525 24/17697 0.00507561973668024 0.0537721658295095 0.0453155156896555 SLC39A5/SLC30A2/SLC41A1/SLC30A8 4

MF GO:0015179 L-amino acid transmembrane transporter activity 6/525 54/17697 0.00512115865042947 0.0537721658295095 0.0453155156896555 SLC3A1/SLC38A5/SLC38A3/SLC25A15/SLC43A1/SLC7A2 6
