# Supplementary material for: Identification of Candidate Therapeutic Target Genes and Profiling of Tumor-Infiltrating Immune Cells in Pancreatic Cancer via Integrated Transcriptomic Analysis
Source: Hindawi journal article supplement (doi:10.1155/2022/3839480), 2022-08-23
Supplement: f3 [file 3839480.f3.docx]

**Supplementary Table S3** KEGG enrichment analysis of the 564 robust DEGs.

ID Description GeneRatio BgRatio pvalue p.adjust qvalue geneID Count

hsa00260 Glycine, serine and threonine metabolism 9/124 40/3894 2.99103151280262e-06 0.000224327363460196 0.000201501070336176 GNMT/CBS/GATM/CTH/GCAT/GAMT/PHGDH/PSAT1/SARDH 9

hsa00480 Glutathione metabolism 7/124 57/3894 0.00197153679746893 0.0594022559581776 0.0533578158782227 ANPEP/CHAC1/GSTA1/GPX2/GGT6/GPX8/GSTA2 7

hsa01230 Biosynthesis of amino acids 8/124 75/3894 0.00237609023832711 0.0594022559581776 0.0533578158782227 GPT2/CBS/CTH/BCAT1/MAT1A/ENO2/PHGDH/PSAT1 8

hsa00270 Cysteine and methionine metabolism 6/124 50/3894 0.00465741681582247 0.0873265652966713 0.0784407042664837 CBS/CTH/BCAT1/MAT1A/PHGDH/PSAT1 6

hsa00561 Glycerolipid metabolism 6/124 61/3894 0.0122517247887826 0.153146559859782 0.137563225698611 PNLIPRP1/PNLIPRP2/CEL/PNLIP/MGLL/MBOAT2 6

hsa00590 Arachidonic acid metabolism 6/124 61/3894 0.0122517247887826 0.153146559859782 0.137563225698611 PLA2G1B/EPHX2/GPX2/PTGS2/GPX8/PTGIS 6

hsa04020 Calcium signaling pathway 14/124 240/3894 0.0191167091735339 0.195676282265171 0.175765362315382 EGF/P2RX1/CHRM3/GRPR/MCOLN3/CCKBR/SLC8A2/EDNRA/MST1R/HTR2B/GNA15/PDGFRB/CXCR4/NTRK2 14

hsa04066 HIF-1 signaling pathway 8/124 109/3894 0.0217774685153314 0.195676282265171 0.175765362315382 EGF/MKNK1/ENO2/HK2/EGLN3/TIMP1/SLC2A1/EPO 8

hsa04060 Cytokine-cytokine receptor interaction 16/124 295/3894 0.0234811538718205 0.195676282265171 0.175765362315382 INHBA/CCL20/CXCL10/CCL18/IL22RA1/OSMR/LIF/IL1RAP/AMHR2/TNFRSF21/IL2RG/TNFRSF11B/CXCL5/TNFSF4/CXCR4/EPO 16

hsa04061 Viral protein interaction with cytokine and cytokine receptor 7/124 100/3894 0.0388417075916575 0.291312806937431 0.261670451143798 CCL20/CXCL10/CCL18/IL22RA1/IL2RG/CXCL5/CXCR4 7

hsa00380 Tryptophan metabolism 4/124 42/3894 0.0431780773097753 0.294395981657559 0.264439899313456 AOX1/DDC/KYNU/CYP1B1 4

hsa02010 ABC transporters 4/124 45/3894 0.0534793214569672 0.334245759106045 0.300234787126834 ABCA5/TAP1/CFTR/ABCC8 4

hsa00830 Retinol metabolism 5/124 68/3894 0.0639883811170832 0.369163737213942 0.331599707813225 AOX1/HSD17B6/SDR16C5/DHRS9/CYP2S1 5

hsa00980 Metabolism of xenobiotics by cytochrome P450 5/124 78/3894 0.101338331009656 0.539308636490929 0.48443161733922 GSTA1/EPHX1/GSTA2/CYP2S1/CYP1B1 5

hsa00250 Alanine, aspartate and glutamate metabolism 3/124 37/3894 0.11206700161215 0.539308636490929 0.48443161733922 GPT2/ABAT/GLS2 3

hsa01210 2-Oxocarboxylic acid metabolism 2/124 19/3894 0.121039123804064 0.539308636490929 0.48443161733922 GPT2/BCAT1 2

hsa01240 Biosynthesis of cofactors 8/124 156/3894 0.122243290937944 0.539308636490929 0.48443161733922 NQO1/BCAT1/MAT1A/KYNU/HSD17B6/PSAT1/SDR16C5/RGN 8

hsa00770 Pantothenate and CoA biosynthesis 2/124 21/3894 0.142772100606845 0.594883752528519 0.534351721569477 BCAT1/VNN1 2

hsa00220 Arginine biosynthesis 2/124 22/3894 0.153929106976797 0.607614895961042 0.545787415319392 GPT2/GLS2 2

hsa01200 Carbon metabolism 6/124 118/3894 0.172360596780223 0.646352237925835 0.580583062838645 GPT2/ENO2/PHGDH/PSAT1/HK2/RGN 6

hsa00280 Valine, leucine and isoleucine degradation 3/124 48/3894 0.195561265478051 0.688639049527983 0.618567005891802 AOX1/ABAT/BCAT1 3

hsa01524 Platinum drug resistance 4/124 73/3894 0.202000787861542 0.688639049527983 0.618567005891802 GSTA1/TOP2A/BIRC3/GSTA2 4

hsa03320 PPAR signaling pathway 4/124 76/3894 0.222194564368536 0.698699916133877 0.627604135193939 ACADL/MMP1/OLR1/ACSL5 4

hsa00650 Butanoate metabolism 2/124 28/3894 0.223583973162841 0.698699916133877 0.627604135193939 ABAT/ACSM3 2

hsa00512 Mucin type O-glycan biosynthesis 2/124 32/3894 0.271292462155232 0.771651839493646 0.693132880387275 GCNT3/ST6GALNAC1 2

hsa00240 Pyrimidine metabolism 3/124 57/3894 0.272149481791516 0.771651839493646 0.693132880387275 ENTPD1/NT5E/CDA 3

hsa00130 Ubiquinone and other terpenoid-quinone biosynthesis 1/124 11/3894 0.299839984591594 0.771651839493646 0.693132880387275 NQO1 1

hsa00430 Taurine and hypotaurine metabolism 1/124 11/3894 0.299839984591594 0.771651839493646 0.693132880387275 GGT6 1

hsa00760 Nicotinate and nicotinamide metabolism 2/124 35/3894 0.307080636883782 0.771651839493646 0.693132880387275 AOX1/NT5E 2

hsa00350 Tyrosine metabolism 2/124 36/3894 0.318949426990707 0.771651839493646 0.693132880387275 AOX1/DDC 2

hsa00500 Starch and sucrose metabolism 2/124 36/3894 0.318949426990707 0.771651839493646 0.693132880387275 HK2/AMY2B 2

hsa00860 Porphyrin and chlorophyll metabolism 2/124 42/3894 0.388882288509423 0.836015858465113 0.750947578130066 CP/HEPH 2

hsa00071 Fatty acid degradation 2/124 43/3894 0.400253923765419 0.836015858465113 0.750947578130066 ACADL/ACSL5 2

hsa04068 FoxO signaling pathway 2/124 43/3894 0.400253923765419 0.836015858465113 0.750947578130066 EGF/FBXO32 2

hsa00982 Drug metabolism - cytochrome P450 3/124 72/3894 0.403940606951306 0.836015858465113 0.750947578130066 AOX1/GSTA1/GSTA2 3

hsa00360 Phenylalanine metabolism 1/124 17/3894 0.423802299145746 0.836015858465113 0.750947578130066 DDC 1

hsa00450 Selenocompound metabolism 1/124 17/3894 0.423802299145746 0.836015858465113 0.750947578130066 CTH 1

hsa00910 Nitrogen metabolism 1/124 17/3894 0.423802299145746 0.836015858465113 0.750947578130066 CA4 1

hsa00061 Fatty acid biosynthesis 1/124 18/3894 0.442231113926744 0.836015858465113 0.750947578130066 ACSL5 1

hsa00565 Ether lipid metabolism 2/124 49/3894 0.466253430696688 0.836015858465113 0.750947578130066 PLA2G1B/PLA2G7 2

hsa00983 Drug metabolism - other enzymes 3/124 80/3894 0.471945015598014 0.836015858465113 0.750947578130066 GSTA1/GSTA2/CDA 3

hsa00100 Steroid biosynthesis 1/124 20/3894 0.477352709749908 0.836015858465113 0.750947578130066 CEL 1

hsa00330 Arginine and proline metabolism 2/124 51/3894 0.487303112184355 0.836015858465113 0.750947578130066 GATM/GAMT 2

hsa04012 ErbB signaling pathway 3/124 85/3894 0.512673086304051 0.836015858465113 0.750947578130066 NRG4/EGF/PAK3 3

hsa03060 Protein export 1/124 23/3894 0.525962682968866 0.836015858465113 0.750947578130066 SEC11C 1

hsa00534 Glycosaminoglycan biosynthesis - heparan sulfate / heparin 1/124 24/3894 0.541147551817189 0.836015858465113 0.750947578130066 HS3ST1 1

hsa01212 Fatty acid metabolism 2/124 57/3894 0.547277026094218 0.836015858465113 0.750947578130066 ACADL/ACSL5 2

hsa00592 alpha-Linolenic acid metabolism 1/124 25/3894 0.555849800802892 0.836015858465113 0.750947578130066 PLA2G1B 1

hsa00140 Steroid hormone biosynthesis 2/124 61/3894 0.584482678474394 0.836015858465113 0.750947578130066 HSD17B6/CYP1B1 2

hsa00591 Linoleic acid metabolism 1/124 29/3894 0.610129911452026 0.836015858465113 0.750947578130066 PLA2G1B 1

hsa01522 Endocrine resistance 3/124 98/3894 0.610230528962505 0.836015858465113 0.750947578130066 MMP9/MMP2/BIK 3

hsa04014 Ras signaling pathway 7/124 232/3894 0.615411781477702 0.836015858465113 0.750947578130066 EGF/PLA2G1B/PAK3/EFNA5/PDGFRB/NTRK2/KSR1 7

hsa00030 Pentose phosphate pathway 1/124 30/3894 0.62263803330971 0.836015858465113 0.750947578130066 RGN 1

hsa00053 Ascorbate and aldarate metabolism 1/124 30/3894 0.62263803330971 0.836015858465113 0.750947578130066 RGN 1

hsa00410 beta-Alanine metabolism 1/124 30/3894 0.62263803330971 0.836015858465113 0.750947578130066 ABAT 1

hsa00052 Galactose metabolism 1/124 31/3894 0.634747992903291 0.836015858465113 0.750947578130066 HK2 1

hsa00010 Glycolysis / Gluconeogenesis 2/124 67/3894 0.636017447286036 0.836015858465113 0.750947578130066 ENO2/HK2 2

hsa04064 NF-kappa B signaling pathway 3/124 104/3894 0.650688103696597 0.836015858465113 0.750947578130066 PLAU/PTGS2/BIRC3 3

hsa00051 Fructose and mannose metabolism 1/124 33/3894 0.657823329844003 0.836015858465113 0.750947578130066 HK2 1

hsa00640 Propanoate metabolism 1/124 34/3894 0.66881268677209 0.836015858465113 0.750947578130066 ABAT 1

hsa00562 Inositol phosphate metabolism 2/124 73/3894 0.68246328984754 0.839094208828943 0.75371269284284 IMPA2/INPP4B 2

hsa04024 cAMP signaling pathway 6/124 216/3894 0.694558049720484 0.840191189178005 0.754698050630068 NPY1R/VIPR2/EDNRA/SST/FXYD2/CFTR 6

hsa01521 EGFR tyrosine kinase inhibitor resistance 2/124 79/3894 0.723997023356651 0.848434011746075 0.762102129849106 EGF/PDGFRB 2

hsa03018 RNA degradation 2/124 79/3894 0.723997023356651 0.848434011746075 0.762102129849106 BTG2/ENO2 2

hsa04062 Chemokine signaling pathway 5/124 192/3894 0.74115940567698 0.855183929627284 0.768165213980999 CCL20/CXCL10/CCL18/CXCL5/CXCR4 5

hsa04022 cGMP-PKG signaling pathway 4/124 167/3894 0.787576077001024 0.879313072864481 0.789839111064236 GATA4/SLC8A2/EDNRA/FXYD2 4

hsa00520 Amino sugar and nucleotide sugar metabolism 1/124 48/3894 0.790488946158345 0.879313072864481 0.789839111064236 HK2 1

hsa00600 Sphingolipid metabolism 1/124 49/3894 0.797243852730463 0.879313072864481 0.789839111064236 SGPP2 1

hsa00564 Glycerophospholipid metabolism 2/124 98/3894 0.826525713381844 0.886293257407987 0.796109031215595 PLA2G1B/MBOAT2 2

hsa03460 Fanconi anemia pathway 1/124 54/3894 0.827911048014135 0.886293257407987 0.796109031215595 UBE2T 1

hsa04010 MAPK signaling pathway 7/124 294/3894 0.839024283679561 0.886293257407987 0.796109031215595 EGF/MKNK1/IL1RAP/MAP4K4/EFNA5/PDGFRB/NTRK2 7

hsa04015 Rap1 signaling pathway 4/124 210/3894 0.910198565312993 0.948123505534367 0.851647780409818 EGF/ID1/EFNA5/PDGFRB 4

hsa00230 Purine metabolism 2/124 130/3894 0.924834174430813 0.950172097017959 0.853487918724903 ENTPD1/NT5E 2

hsa00190 Oxidative phosphorylation 1/124 133/3894 0.987475058610574 0.99459757723448 0.893392911480796 ATP4A 1

hsa03010 Ribosome 1/124 158/3894 0.99459757723448 0.99459757723448 0.893392911480796 RPL3L 1
